The biological functions of Naa10.

Max Doerfel<sup>1</sup>, Gholson J. Lyon<sup>1,2,3\*</sup>

1) Stanley Institute for Cognitive Genomics, Cold Spring Harbor Laboratory, NY, USA; 2) Department of Psychiatry, Stony Brook University, Stony Brook, NY, USA; 3) Utah Foundation for Biomedical Research, Salt Lake City, UT, USA.

Author emails:

Max Doerfel: [MDoerfel@cshl.edu](mailto:MDoerfel@cshl.edu)

\*Gholson J. Lyon: [gholsonjlyon@gmail.com](mailto:gholsonjlyon@gmail.com)

\*Corresponding author.

Key Words: amino-terminal acetylation; acetyltransferases; proteins; proteomics; enzymology; Ogden Syndrome; NAA10; NAA15; NAA50.

## **Abstract:**

N-terminal acetylation (NTA) is one of the most abundant protein modifications known, and the NAT machinery is conserved throughout all Eukarya. Over the past 50 years, the function of NTA has begun to be slowly elucidated, and this includes the modulation of protein-protein interaction, protein-stability, protein function, and as well as protein targeting to specific cellular compartments. Many of these functions have been studied in the context of Naa10/NatA; however, we are only starting to really understand the full complexity of this picture. Roughly, about 40 % of all human proteins are substrates of Naa10 and the impact of this modification has only been studied for a few of them. Besides acting as a NAT in the NatA complex, recently other functions have been linked to Naa10, including post-translational NTA, lysine acetylation and NAT/KAT-independent functions. Also, recent publications have linked mutations in Naa10 to various diseases, emphasizing the importance of Naa10 research in humans. The recent design and synthesis of the first 3 bisubstrate inhibitors that potently and selectively inhibit the NatA/Naa10 complex, monomeric Naa10, and hNaa50 further increases the toolset to analyze Naa10 function.

## *Table of content*

|                                                                        |           |
|------------------------------------------------------------------------|-----------|
| <b>INTRODUCTION</b>                                                    | <b>1</b>  |
| 1.1 General Functions of Amino-terminal acetylation                    | 3         |
| 1.2 The NatA complex                                                   | 5         |
| 1.2.1 Mammalian Naa10 and isoforms                                     | 7         |
| 1.2.2 Mammalian Naa15 and isoforms                                     | 8         |
| 1.2.3 other NatA components                                            | 8         |
| 1.2.4 Localization of NatA                                             | 9         |
| <b>MAMMALS</b>                                                         | <b>12</b> |
| 1.3 Naa10 function in mammals                                          | 12        |
| 1.3.1 Naa10 and cyclin D1 regulation                                   | 13        |
| 1.3.2 NF-kB/ DNA damage                                                | 16        |
| 1.3.3 Naa10 in cellular hypoxia                                        | 18        |
| 1.3.4 Naa10 in bone formation                                          | 22        |
| 1.3.5 Naa10 in neuronal development                                    | 23        |
| 1.3.6 Naa10 and disease                                                | 24        |
| 1.4 Function of Naa15/Naa16/Tubedown                                   | 27        |
| 1.5 Function of Naa50                                                  | 27        |
| <b>NATA IN OTHER ORGANISMS</b>                                         | <b>29</b> |
| 1.6 Naa10 in <i>C. elegans</i>                                         | 29        |
| 1.7 NatA in Yeast ( <i>S. cerevisiae</i> unless indicated otherwise)   | 30        |
| 1.7.1 Mating type/silencing defect                                     | 30        |
| 1.7.2 NatA in ribosome function and protein targeting                  | 33        |
| 1.7.3 NatA and proteasome function                                     | 35        |
| 1.7.4 NatA in prion propagation                                        | 38        |
| 1.8 NATs in prokaryotes (archaeabacteria, eubacteria)                  | 39        |
| 1.8.1 In <i>E. coli</i> : RIMs                                         | 39        |
| 1.8.2 In Archaea                                                       | 40        |
| 1.9 NATs in plants                                                     | 41        |
| 1.10 Function of NTA in plants                                         | 42        |
| <b>CONCLUSION</b>                                                      | <b>44</b> |
| 1.11 Co-translational NTA and protein quality control                  | 44        |
| 1.12 Post-translational NTA of Naa10                                   | 45        |
| 1.13 NAT-independent functions of Naa10 and transcriptional regulation | 46        |
| <b>REFERENCES</b>                                                      | <b>48</b> |

# 1 INTRODUCTION

N<sup>α</sup>-terminal acetylation (NTA) is one of the most abundant modifications of eukaryotic proteins. Today it is believed that the majority of the proteome of higher organisms is fully or partially acetylated. In fact, recent large-scale proteomics analyses have identified peptides that were fully or partially acetylated at their designated N-terminus in the following percentages: 13-19% in *Halobacterium salinarum* and *Natronomonas pharaonis* (Falb et al., 2006; Aivaliotis et al., 2007), 29% in *Haloferax volcanii* (Kirkland et al., 2008), 16% in bacteria (45 different organisms (Bonissone et al., 2013), 60-70% in *S. cerevisiae* (Arnesen et al., 2009b; Van Damme et al., 2011c; Bonissone et al., 2013; Van Damme et al., 2014), 75% in *Drosophila melanogaster* (Goetze et al., 2009), 90% in *Arabidopsis thaliana* (Bienvenut et al., 2012), at least 4% in *C. elegans* (Mawuenyega et al., 2003), 83% in mouse (Lange and Overall, 2011), 90% in human erythrocytes (Lange et al., 2014) and 85% in HeLa cells (Arnesen et al., 2009b; Van Damme et al., 2011c). However, it should be noted that these values do not necessarily reflect the whole proteomes. A recent computational analysis of large-scale proteome analyses was used to develop prediction software for NTA in archae (*P. furiosus*, *T. acidophilum*, *H. salinarum* and *N. pharaonis*), animals (*Homo sapiens*, *Caenorhabditis elegans*, and *Drosophila melanogaster*), plants (*A. thaliana* and *Oryza sativa*) and fungi (*S. cerevisiae* and *N. crassa*). The analysis revealed a bias for N-terminal acetylated proteins in highly abundant cytosolic proteins (Martinez et al., 2008). This bias could indicate that the reported percentage of acetylation is higher than the percentage in the actual proteomes: archae 1-6.5%, animal 58 %, fungi and plants 60% (Martinez et al., 2008). Furthermore, in some studies only annotated N-termini were analyzed, others included N-termini derived from alternative translation initiation sites.

*In vitro* data suggests that NTA occurs mainly co-translationally on the emerging polypeptide chain at a length of approximately 25-80 residues (Strous et al., 1973; Filner and Marcus, 1974; Strous et al., 1974; Driessen et al., 1985; Gautschi et al., 2003), either on the initiating methionine (iMet) or on the second amino acid after methionine cleavage, also known as N-terminal methionine excision (NME) (Kendall and Bradshaw, 1992; Xiao et al., 2010; Bonissone et al., 2013). The removal of the iMet is the first occurring widespread protein modification and involves peptide deformylases and methionine aminopeptidases (MetAPs) (Gigliante et al., 2014). In addition to co-translational acetylation, accumulating evidence also supports the occurrence of post-translational N<sup>α</sup>-acetylation. The ribosomal protein L7/L12 in *E. coli* e.g. becomes acetylated post-translationally depending on the availability of nutrients (Gordiyenko et al., 2008). Furthermore, proteomic analyses identified NTA of internal peptides, further supporting the idea of post-translational acetylation (Helbig et al., 2010; Helsens et al., 2011). This is especially interesting for many proteins that are imported into organelles, after which the cleaved mature N-terminus of the protein (now missing its target/transit peptide) is acetylated by dedicated NATs that reside in the respective target organelle as shown for yeast mitochondrial localized proteins (Van Damme et al., 2014) or chloroplast proteins in *Chlamydomonas reinhardtii* and *Arabidopsis thaliana* (Zybailov et al., 2008; Bienvenut et al., 2011; Bienvenut et al., 2012).

N<sup>α</sup>-terminal acetylation is catalyzed by distinct N<sup>α</sup>-acetyltransferases (NATs) that belong to the GCN5-related N-acetyltransferase (GNAT) family, a diverse family that

Date: 2015-01-28

catalyze the transfer of an acetyl group from acetyl-CoA to the primary amine of a wide variety of substrates from small molecules to large proteins (Vetting et al., 2005). Besides the NATs, this protein family also includes/contains lysine acetyltransferases (KATs) and histone acetyltransferases (HATs) (Marmorstein and Zhou, 2014).

In 2009, a new nomenclature for the N<sup>α</sup>-acetyltransferases was introduced (Polevoda et al., 2009), in which the concept of multi-protein complexes for NATs was formalized. In humans, six NATs, NatA-F, were defined that specifically co-translationally catalyze the acetylation of the N<sup>α</sup>-terminal amino group of a well-defined subset of proteins, although N<sup>ε</sup>-acetylation of internal lysines has also been reported (Kalvik and Arnesen, 2013). NatA consists of the catalytic subunit Naa10 and the auxiliary subunit Naa15 and acetylates small side chains such as Ser, Ala, Thr, Gly, Val after the initiator methionine has been cleaved by methionine aminopeptidases (via NME) (see Figure 1). NatB and NatC are defined as including the catalytic subunits Naa20 and Naa25 and the auxiliary subunits Naa30 and Naa35/Naa38, respectively. They acetylate proteins with their methionine retained. The only known substrates for NatD (Naa40) are histone H2A and H4. Naa50 is the catalytic subunit of NatE, with a substrate specificity for N-termini starting with methionine followed by Leu, Lys, Ala and Met. NatF is composed of Naa60 and has a substrate specificity that partially overlaps with NatC and NatE. It is important to note that this might not be the complete picture, as there are possibly other proteins binding and interacting with proteins in these NATs as currently defined [for reviews see (Arnesen, 2011; Van Damme et al., 2011a; Starheim et al., 2012)].

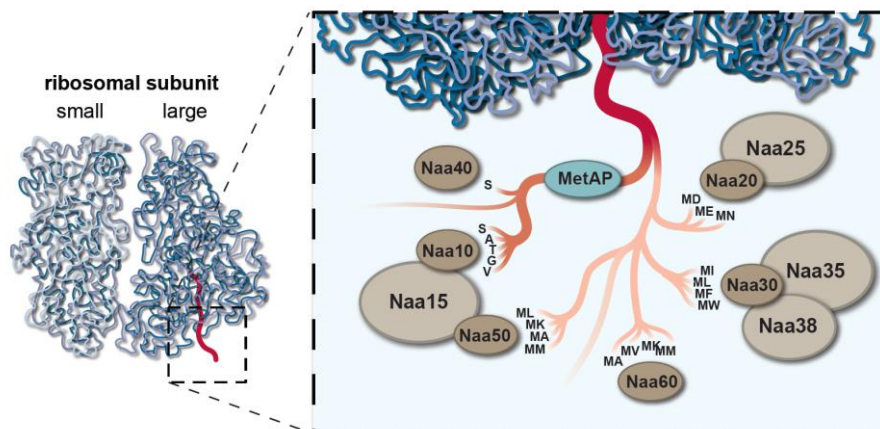

**Figure 1:** The co-translational N-terminal protein modification process. As soon as the nascent polypeptide chain emerges from the ribosome exit tunnel, the initiator methionine is cleaved by methionine aminopeptidases (MetAPs) if the following amino acid is small and uncharged. For the sake of simplicity, this process is illustrated by one enzyme despite the fact that other enzymes including peptide deformylases are involved, depending on organism and cellular compartment. Subsequently, the new N-termini can get acetylated by NatA, composed of the catalytic Naa10 and the auxiliary subunit Naa15. The majority of cytosolic proteins fall into this category. If the iMet is not processed, NTA can be accomplished by NatB (composed of Naa20 and Naa25), NatC (Naa30, Naa35, Naa38), NatD (Naa40) NatE (Naa50 and possibly Naa15) and NatF (Naa60). Figure modified from (Kalvik and Arnesen, 2013).

Modeling of the substrate binding pocket of the catalytic subunits of different NATs revealed that 3 tyrosines in the catalytic center form a scaffold ready to interact with the peptide backbone of the substrate, whereas the specificity of each NAT is tuned by

surrounding amino acids that are not conserved between the different NATs (Grauffel et al., 2012).

## 1.1 General Functions of Amino-terminal acetylation

Despite its discovery more than 50 years ago, very little is known about the biological function of NTA. For many years, it has been generalized from a few examples that NTA broadly protects many proteins from degradation. This was supported by the fact that acetylation of globin and lysozyme prevents their degradation by the ubiquitin proteolytic system from reticulocytes (Hershko et al., 1984). In line with this, the NTA of enkephalins diminishes their proteolytic cleavage by aminopeptidase M. (Jayawardene and Dass, 1999), improves the chemical stability of guinea pig myelin basic protein (de Haan et al., 2004) and protects glucagon-like peptide (GLP-1) from DPP-IV- (dipeptidyl peptidase IV) mediated degradation (John et al., 2008). Analysis of the half-life of  $\beta$ -galactosidase in a split-ubiquitin system showed that proteins having N-terminal amino acids that are prone to acetylation (Met, Ser, Ala, Thr, Val, or Gly) have a relative long half-life, whereas Arg, Lys, Phe, Leu, or Asp at the amino-terminus have very short half-lives (Bachmair et al., 1986). One way that NTA could contribute to protein stability is by blocking the access for N-terminal ubiquitination as shown for p16 and p14/p19<sup>ARF</sup> (Ben-Saadon et al., 2004; Ciechanover and Ben-Saadon, 2004; Kuo et al., 2004). Also, p21<sup>Cip1</sup> is acetylated (most likely by NatA) at its N-terminus, whereas an N-terminally tagged variant that abolishes N<sup>α</sup>-acetylation becomes ubiquitinated (Chen et al., 2004). Another study suggests that NTA may play a role in the structural stabilization of N-terminally flexible proteins, as bioinformatics analysis of the yeast proteome showed that proteins with N-terminal-disordered regions are more likely to be acetylated (Holmes et al., 2014). In line with that, many studies have shown directly that NTA can stabilize an N-terminal  $\alpha$ -helix (Shoemaker et al., 1987; Fairman et al., 1989; Chakrabartty et al., 1993; Doig et al., 1994; Greenfield et al., 1994; Jarvis et al., 1995; Fauvet et al., 2012; Kang et al., 2012; Kang et al., 2013). However, other studies suggest that NTA has no effects on protein stability (Greenfield et al., 1994; Yi et al., 2011). In addition, recent studies showed that acetylation might regulate protein stability and degradation for some proteins, depending on the cellular availability of interaction partners. The ubiquitin ligase Doa10 recognizes Nt-acetylated Ala, Val, Ser, Thr, and Cys and earmarks acetylated substrates for degradation (Hwang et al., 2010). NTA therefore creates protein degradation signals (<sup>Ac</sup>N-degrons) that are targeted by the Ac/N-end rule pathway resulting in ubiquitylation and proteasome-mediated degradation by the Doa10 E3 N-recogin, in conjunction with the Ubc6 and Ubc7 E2 enzymes (Varshavsky, 2011). Conversely, multiple Doa10 substrates do not require N<sup>α</sup>-acetylation for their degradation, and acetylation has only mild effects on the stability of the tested substrates (Zattas et al., 2013). These discrepancies can be explained with the findings that N<sup>α</sup>-acetylation can have stabilizing effects when an interaction partner is involved. In this case, the acetylated N-termini recruits the interaction partners that then shield the <sup>Ac</sup>N-degron, preventing ubiquitylation and degradation to regulate subunit stoichiometries (Shemorry et al., 2013). In agreement with this, it is widely accepted that N<sup>α</sup>-terminal acetylation can act as an avidity enhancer within protein complexes (Deakin et al., 1980; Scott et al., 2011; Nazmi et al., 2012). Interestingly, NTA may also



Date: 2015-01-28

regulate NEDDylation, as N<sup>α</sup>-terminal acetylation of the E2 enzyme, Ubc12, is absolutely required for its interaction with E3, Dcn1, and promotes cullin neddylation (Scott et al., 2011). This is also another good example where NTA acts as an avidity enhancer.

Another function of NTA has been implicated in protein sorting and secretory processes. In yeast, the ARF-like GTPase Arl3p/ARP is acetylated by NatC and this modification is required for its targeting to the Golgi apparatus, possibly through the acetylation-dependent interaction with the integral membrane protein Sys1p (Setty et al., 2004). Simultaneously, a different group confirmed that Sys1p is the receptor for Arl3p and knockout of NatC or mutation of the NatC complex, that abrogated its acetyltransferase activity, resulted in failure to target Arl3p to the Golgi (Behnia et al., 2004). Furthermore, targeting of the human homologue of Arl3p, ARFRP1, is dependent on Sys1p and mutation of the N-terminus of ARFRP1, that disagrees with acetylation by NatC, induced its mis-localization in COS cells (Behnia et al., 2004). This and the fact that the N-terminus of Arl3p is a potential NatC substrate in *S. cerevisiae*, *D. melanogaster*, *C. elegans* and plants indicates that this system is well conserved. Interestingly, two other human lysosomal Arf-like GTPases, Arl8a and Arl8b (also known as Arl10b/c and Gie1/2), and their single homologue in *Drosophila* are potential substrates of NatC and mass spectrometric analyses confirmed that human Arl8b is N-terminally acetylated (Hofmann and Munro, 2006). Later *in vitro* acetylation assays showed that Arl8b is acetylated by NatC and knockdown of the catalytic subunit of NatC (Starheim et al., 2009a) or replacement of the leucine in position 2 with alanine (Hofmann and Munro, 2006) resulted in a loss of its lysosomal localization. It should be mentioned the protein was still found to be acetylated, presumably by NatA following removal of the initiator methionine (Hofmann and Munro, 2006), indicating that specifically the acetylated methionine rather than acetylation itself is important for lysosomal targeting of Arl8b. Also, the inner nuclear membrane protein Trm1-II was found to be mislocated to the nucleoplasm, when NatC was knocked out or when the penultimate amino acid was mutated to inhibit NatC-dependent NTA (Murthi and Hopper, 2005). On the other hand, systematic analysis of predicted N-terminal processing in yeast showed that cytoplasmic proteins are typically acetylated, whereas those bound to ER are largely unmodified (Forte et al., 2011). Mutation of the N-terminal amino acid of the secretory protein carboxypeptidase Y, which allowed acetylation of this protein, inhibited targeting to the ER (Forte et al., 2011). However, fluorescence microscopy analysis in yeast indicated unaltered subcellular localization patterns for all 13 studied NatC substrates, after disruption of NatC catalytic subunit (Aksnes et al., 2013). Furthermore, no disruption of the nuclear membrane, endoplasmic reticulum, Golgi apparatus, mitochondria, or bud neck was observed, suggesting the intactness of these organelles and subcellular structures as judged by the unchanged shape, number, size and distribution in the cell (Aksnes et al., 2013). Taken together, this indicates that NatC is not – at least not in general – a determinant for substrate subcellular localization (Aksnes et al., 2013). Similarly, fluorescence microscopy analysis of 13 NatB substrates in wild type and NAA20Δ yeast cells revealed that acetylation by NatB is not a general signal for protein localization (Caesar et al., 2006).

Other examples in which NTA can affect protein function and/or activity include hemoglobin isoforms (Scheepens et al., 1995; Ashiuchi et al., 2005), phospholamban (PLB) (Starling et al., 1996), N-TIMPs (N-terminal inhibitory domains of TIMPs /inhibitors of

metalloproteinases (Van Doren et al., 2008), parvalbumin (Permyakov et al., 2012), melanocyte-stimulating hormone (MSH) in the barfin flounder (*Verasper moseri*) (Kobayashi et al., 2009), the contractile proteins actin and tropomyosin in fission and budding yeast (Polevoda et al., 2003; Singer and Shaw, 2003; Coulton et al., 2010) as well as the stress-induced carboxypeptidase Y inhibitor Tfs1p in yeast (Caesar and Blomberg, 2004).

In addition, NTA has been linked to various diseases, including apoptosis and cancer (Kalvik and Arnesen, 2013), host parasite interaction in malaria (Chang et al., 2008), and has been discussed to play a role in Parkinson's disease (see below). As pointed out in earlier reviews: “Although...[NTA]...is essential for cell viability and survival, very little is known about the physiological reasons associated with this crucial role” (Gigliione et al., 2014) and “there may be a variety of acetylation-dependent functions depending on the target protein, rather than one general function [and] there is even the possibility that this modification affects the function of only very few proteins” (Arnesen, 2011).

The best studied N<sup>α</sup>-acetyltransferases NatA consists of the catalytic subunit Naa10 and the auxiliary subunit Naa15. In this review we mainly concentrate on Naa10 structure and function and discuss the recent development of the field.

## 1.2 The NatA complex

As mentioned above, the NatA complex consists at least of the auxiliary and catalytic subunit, Naa15 and Naa10, respectively and is evolutionarily conserved from yeast to vertebrates (Mullen et al., 1989; Park and Szostak, 1992; Sugiura et al., 2003; Arnesen et al., 2005a). We adopt here the nomenclature of inserting letters to indicate the species about which we are discussing, so yNatA refers to NatA in yeast, where we are specifically referring to *S. cerevisiae*, hNatA refers to NatA in humans, and mNatA refers to NatA in mice. However, this nomenclature in 2009 did not address other species, and it might be worth updating the nomenclature at some future international meeting focused on the NATs.

In any case, there is good *in vitro* and *in vivo* evidence that yNatA acetylates the N-termini of small side chains like serine, alanine, glycine and threonine (Arnold et al., 1999; Polevoda et al., 1999) and NatA from humans has identical or nearly identical specificities, acetylating proteins starting with small side chains like serine, glycine, alanine, threonine and cysteine (Arnesen et al., 2009b; Van Damme et al., 2011b; Van Damme et al., 2011c) after the removal of the initiator methionine by methionine aminopeptidases. However, it is critical to note that heterologous combinations of human and yeast subunits are not functional in yeast, suggesting significant structural subunit differences between the species, presumably due to lack of proper dimerization due to species-specific differences between the proteins (Arnesen et al., 2009b). Interestingly, (Met-)Ala-N-termini are more prevalent in the human proteome, whereas (Met)-Ser-N-termini are more abundant in the yeast proteome (Van Damme et al., 2011c). Accordingly, hNatA displays a preference towards these Ala-N-termini whereas yNatA seems to be the more efficient in acetylating Ser-starting N-termini, indicating that NatA substrate specificity/efficiency of Nt-acetylation has co-evolved with the repertoire of NatA type substrates expressed (Van Damme et al., 2014).

Size-exclusion chromatography and circular dichroism showed that purified human Naa10 consists of a compact globular region comprising two thirds of the protein and a flexible unstructured C-terminus (Sánchez-Puig and Fersht, 2006). The recent X-ray crystal



Date: 2015-01-28

structure of the 100 kD holo-NatA (Naa10/Naa15) complex from *S. pombe* revealed that the auxiliary subunit Naa15 is composed of 37  $\alpha$ -helices ranging from 8 to 32 residues in length, among which 13 conserved helical bundle tetratricopeptide repeat (TPR) motifs can be identified (Liszczyk et al., 2013). These Naa15 helices form a ring-like structure that wraps completely around the Naa10 catalytic subunit (Liszczyk et al., 2013). TPR motifs mediate protein-protein interactions, and it was speculated that TPR might be important for interaction with other NatA-binding partners such as the ribosome, Naa50/NatE and the HYPK chaperone (Liszczyk et al., 2013). We discuss the possible interaction with NatE in more detail below. Naa10 adopts a typical GNAT fold containing a N-terminal  $\alpha$ 1-loop- $\alpha$ 2 segment that features one large hydrophobic interface and exhibits the most intimate interactions with Naa15, a central acetyl CoA-binding region and C-terminal segments that are similar to the corresponding regions in Naa50 (Liszczyk et al., 2013). The X-ray crystal structure of archaeal *T. volcanium* Naa10 has also been reported, revealing multiple distinct modes of acetyl-Co binding involving the loops between  $\beta$ 4 and  $\alpha$ 3 including the P-loop (Ma et al., 2014). To our knowledge, there is not yet any published cryo-electron microscopy data regarding larger complexes between the ribosome, nascent polypeptide chain and any NATs. A very elegant cryo-EM structure of the ribosome, nascent polypeptide chain, and the signal recognition particle was recently published (Voorhees et al., 2014).

Besides acting in a complex, it has been shown that a fraction of human Naa10 exists independent of Naa15 in the cytoplasm and is able to acetylate acidic side chains like aspartate and glutamate in  $\gamma$ - and  $\beta$ -actin (Van Damme et al., 2011b; Foyen et al., 2013a). These Type I actins are natural NatB substrates (initiator methionine followed by amino acid with acidic side chain) and are therefore initially acetylated by NatB at the methionine in yeast and humans (Van Damme et al., 2012). However, further processing/cleavage by an N<sup>α</sup>-acetylaminopeptidase (ANAP), which specifically removes the N-terminal Ac-Met or Ac-Cys from actin exposes the acidic N-terminal residue (Polevoda and Sherman, 2003b), which can be subsequently acetylated by Naa10. This substrate switching of Naa10 from small side chains towards acidic side chains could be explained by comparing the X-ray crystal structures of complexed (Naa15-bound) and uncomplexed Naa10 of *S. pombe*. The complexed form of Naa10 adopts a GNAT fold containing a central acetyl CoA-binding region and flanking N- and C-terminal segments that allows the acetylation of conventional substrates (Liszczyk et al., 2013). In the uncomplexed form, Leu22 and Tyr26 shift out of the active site of Naa10 and Glu24 is repositioned by ~5 Å resulting in a conformation that allows for the acetylation of acidic N-termini (Liszczyk et al., 2013). However, it should be noted that some proteins starting with an N-terminal acidic amino acid are usually further modified by arginyl-transferases and targeted by the Arg/N-end rule pathway for degradation (Varshavsky, 2011). Therefore, further studies have to show if Type I actins are unique substrates of non-complexed Naa10 and/or if more *in vivo* substrates with acidic N-termini exist. Such studies also need to explore whether the NTA of actin does trigger any downstream processing in the Arg/N-end rule pathway.

Apart from its function as an N-terminal acetyltransferase, NatA has been shown at least *in vitro* to possess N-terminal propionyltransferase activity (Foyen et al., 2013b) and lysine acetylation activity (Jeong et al., 2002; Lin et al., 2004; Lim et al., 2006; Yoo et al., 2006; Lim et al., 2008; Lee et al., 2010b; Shin et al., 2014). Autoacetylation at an internal

Date: 2015-01-28

lysine K136 in hNaa10 e.g. has been shown to regulate its enzymatic activity (Seo et al., 2010). However, LC/MS/MS analyses on human Naa10 expressed and purified from *E. coli* did not show acetylation at any of the internal 16 lysines but identified autoacetylation on its own N-terminal glycine (Murray-Rust et al., 2006). The physicochemical properties of a lysine side chain are quite different from the known N-terminal substrates, thus it is not yet known how much lysine is directly acetylated by monomeric Naa10. The degree to which autoacetylation of Naa10 occurs *in vivo* is also currently not well characterized.

### 1.2.1 Mammalian Naa10 and isoforms

Naa10 (N<sup>α</sup>-acetyltransferase 10; NatA catalytic subunit; ARD1, arrest-defective protein 1 homolog; DXS707; TE2), the catalytic subunit of NatA, has an apparent molecular weight of 26 kDa and contains a typical Gcn5-related N-acetyltransferases (GNAT) domain. In mouse, *NAA10* is located on chromosome X A7.3 and contains 9 exons. Two alternative splicing products of mouse Naa10, mNaa10<sup>235</sup> and mNaa10<sup>225</sup>, were reported in NIH-3T3 and JB6 cells that may have different activities and function in different subcellular compartments (Chun et al., 2007). The human *NAA10* is located on chromosome Xq28 and is encoded by 8 exons (Tribioli et al., 1994). According to RefSeq (NCBI) (Pruitt et al., 2007), three different isoforms derived from alternate splicing (see Figure 2) exist. Additionally, a processed *NAA10* gene duplicate *NAA11* (ARD2) has been identified that is expressed in several human cell lines (Jurkat, HEK293, NPA) (Arnesen et al., 2006b). However, later studies have revealed data arguing that Naa11 is not expressed in the human cell lines HeLa and HEK293 or in cancerous tissues, and *NAA11* transcripts were only detected in testicular and placental tissues (Pang et al., 2011). Naa11 has also been found in mouse, where it is mainly expressed in the testis (Pang et al., 2009). *NAA11* is located on chromosome 4q21.21 or 5 E3 for human or mouse, respectively, and only contains two exons.

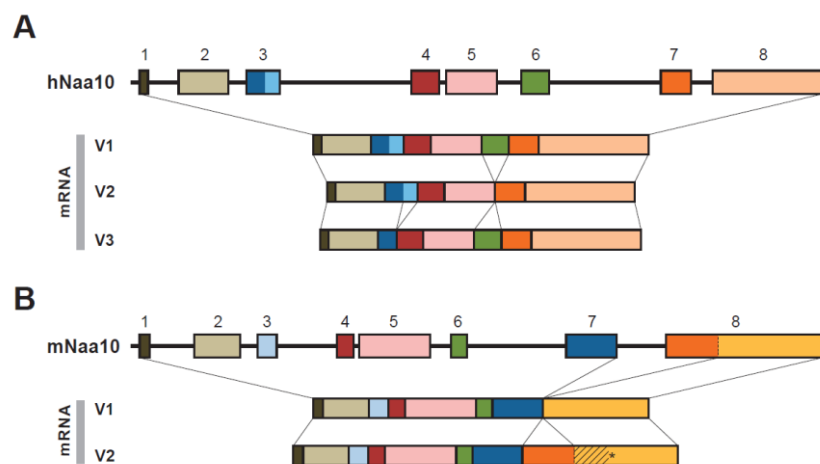

**Figure 2:** *NAA10* transcript variants. A) Human *NAA10* according to RefSeq. There are 3 human transcript variants. Variant 1 represents the longest transcript and encodes the longest isoform (235 aa). Variant 2 lacks in-frame exon 6 in the coding region and is shorter than isoform 1 (220 aa). Variant 3 uses an alternate in-frame splice site in exon 3 (229 aa). B) In mouse, two *NAA10* transcripts are described. Variant 1 represents the shorter transcript but the longer isoform (235 aa). Variant 2 uses an alternate splice site (exon 8), which results in a frameshift that induces a stop codon (\*). The resulting isoform has a shorter and distinct C-terminus.

## 1.2.2 Mammalian Naa15 and isoforms

Human Naa15 (N<sup>α</sup>-acetyltransferase 15; NatA auxiliary subunit, NMDA Receptor-Regulated Protein; NARG1; Tubedown-100; Tbdn100 ; tubedown-1, NATH) is considered to be mainly the auxiliary subunit of NatA, although it certainly might have independent functions. The human *NAA15* gene is located on chromosome 4q31.1 and contains 23 exons. Initially, 2 mRNA species were identified, 4.6 and 5.8 kb, both harboring the same open reading frame encoding a putative protein of 866 amino acids (~105 kDa) protein that can be detected in most human adult tissues (Fluge et al., 2002). According to RefSeq/NCBI (Pruitt et al., 2007), only one human transcript variant exists, although 2 more isoforms are predicted. It should be noted that, in addition to full length Naa15, a N-terminally truncated variant of Naa15 (named tubedown-1), Naa15<sub>273-865</sub>, has been described (Gendron et al., 2000). However, northern blot analyses of poly(A) mRNA from mouse revealed that full length Naa15 is widely expressed, whereas smaller transcripts were visualized merely in heart and testis (Willis et al., 2002).

Similar to the situation with *NAA10*, a *NAA15* gene variant has been identified, *NAA16*, that originates from an early vertebrate duplication event (Arnesen et al., 2009a). The encoded protein shares 70% sequence identity to hNaa15 and is expressed in a variety of human cell lines, but is generally less abundant as compared to hNaa15 (Arnesen et al., 2009a). Three isoforms of Naa16 are validated so far (NCBI RefSeq). Mouse *NAA15* is located on chromosome 2 D and contains 20 exons, whereas mouse *NAA16* is located on chromosome 14 D3 and consists of 21 exons.

It has been shown in principle that NatA could assemble from all the isoforms. Naa15 interacts with Naa11, in humans (Arnesen et al., 2006b) and mouse (Pang et al., 2009), and Naa10 interacts with the Naa15 paralogue, Naa16, creating a more complex and flexible system for N<sup>α</sup>-terminal acetylation as compared to lower eukaryotes (Arnesen et al., 2009a). Such a system might create the opportunity for functional redundancy or compensation in the event of loss of Naa10 or Naa15, although we are not aware of any studies showing whether *NAA11* expression might be upregulated in tissues lacking or having reduced *NAA10* expression.

## 1.2.3 other NatA components

As there is a known crystal structure of *S. pombe* Naa10 bound to NAA15, it is safe to conclude that this is a very stable complex in that species. We await such crystal structures for human Naa10 and Naa15. It is certainly possible that there are proteins interacting transiently with NatA, but there could also be the possibility of a more stable trimeric or larger complex involving Naa50 (N<sup>α</sup>-acetyltransferase 50, NatE; NAT13; Mak3; Nat5, SAN separation anxiety) or other proteins. Naa50 is the catalytic acetyltransferase subunit of NatE, is expressed in several human cell lines, and has been shown to be associated with NatA in yeast (Gautschi et al., 2003), fruit fly (Williams et al., 2003) and humans (Arnesen et al., 2006a). Naa50 has a distinct substrate activity for Met followed by a hydrophobic amino acid in human and yeast (Polevoda et al., 1999; Evjenth et al., 2009; Evjenth et al., 2012) and has been claimed to possess ε-acetyltransferase activity towards K525 in β-tubulin (Chu et al., 2011) and histone 4 (Evjenth et al., 2009). Furthermore, hNaa50 has been shown to harbor autoacetylation activity on internal lysines (K34, K37 and K140) *in vitro*, modulating Naa50

Date: 2015-01-28

substrate activity (Evjenth et al., 2009; Evjenth et al., 2012). However, in contradiction to this, the X-ray crystal structure of human Naa50 revealed a GNAT fold with a specific substrate binding groove that allows for acetylation of  $\alpha$ -amino substrates but excludes lysine side chains as a substrate (Liszczyk et al., 2011). This seems to be strong evidence against a role for Naa50 in direct acetylation of lysine side chains. Further studies have to sort out these discrepancies.

Because Naa50 has a distinct/different substrate specificity and *NAA50* $\Delta$  cells did not display the NatA phenotype in yeast (Gautschi et al., 2003), Naa50 was considered as an independent NAT and was named NatE (Starheim et al., 2009b). Furthermore, in HeLa cells, more than 80 % of endogenous Naa50 is not associated with the NatA complex (Hou et al., 2007). Therefore, future experiments have to examine whether Naa50 has a distinct function independent of NatA and/or if Naa50 works in a cooperative manner with NatA.

Recently, the chaperone like protein HYPK (Huntingtin Interacting Protein K) was shown to interact with Naa10 and 15 and is required for NTA of the known *in vivo* NatA substrate PCNP (Arnesen et al., 2010). However, it is an open question whether HYPK generally is required for NatA-mediated acetylation of downstream substrates.

Further interaction partners of Naa10 have been identified including Myosin light-chain kinase, MYLK (Shin et al., 2009), tuberous sclerosis 2, TSC2 (Kuo et al., 2010) RelA/p65 (Xu et al., 2012) DNMT1 (DNA methyltransferase 1) (Lee et al., 2010a), androgen receptor (Wang et al., 2012) and proteasome activator 28 $\beta$  (Min et al., 2013). In high throughput screens CDC25A (cell division cycle 25 homolog) (Rual et al., 2005) and Rho guanine nucleotide exchange factor 6 have been shown as interaction partners of NatA (Xiao et al., 2007). Additionally,  $\beta$ -Catenin (Lim et al., 2006; Lim et al., 2008), HIF-1 $\alpha$  (Jeong et al., 2002; Arnesen et al., 2005b) and methionine sulfoxide reductase A (Shin et al., 2014) have been suggested to bind to Naa10. In a recent high-throughput study, multiple orthogonal separation techniques were employed to resolve distinct protein complexes. Fractionation of soluble cytoplasmic and nuclear extracts from HeLa S3 and HEK293 cells into 1,163 different fractions identified several interaction partners for Naa10 (Naa15, Naa16, Mina, M89BB, TCEA1 and PLC $\beta$ 3) and Naa15 (RT21, ML12A, HYPK and Cap1), Naa16 (TCEA1, PLCB3, Naa10 and Mina) (Havugimana et al., 2012). However, these interactions seem to be transient in the cell and have not yet been shown to regulate or change NatA function; therefore, we do not list them as part of any putative larger NatA complex. As we stated above, definitive evidence of any sort of larger stable complex, other than the dimer between Naa10 and Naa15, could come from structural studies, including possibly cryo-electron microscopy.

#### 1.2.4 Localization of NatA

Mainly from yeast data, it is thought that the auxiliary subunits of NatA as well as other NATs are associated with mono- and polysome fractions and co-translationally acetylate the nascent polypeptide chain as it emerges from the ribosome (Gautschi et al., 2003; Polevoda et al., 2008). In line with this, it has been shown that human Naa10 and Naa15, HYPK (Arnesen et al., 2010), the human paralog of Naa15, Naa16 (Arnesen et al., 2009a) as well as yeast Naa15 (Raue et al., 2007) and rat Naa15 (Yamada and Bradshaw, 1991) are associated with poly- or monosomes. In yeast, NatA binds via the ribosomal

Date: 2015-01-28

proteins, uL23 and uL29 (Polevoda et al., 2008). Further data indicates that NatA preferably associates with translating ribosomes. Particularly, yNatA as well as other ribosome-associated protein biogenesis factors (including the chaperones Ssb1/2 and ribosome-associated complex, signal recognition particle and the aminopeptidases Map1 and Map2) bind with increased apparent affinity to randomly translating ribosomes as compared with non-translating ones (Raue et al., 2007). Interestingly, Hsp70 chaperones may be direct targets of NatA and NTA by NatA contributes an unanticipated influence on protein biogenesis, both through and independent of Hsp70 activity (Holmes et al., 2014), supporting a role of NatA in protein biogenesis. However, the NatA complex also exists in a ribosome-free context. For instance it has been shown that the majority of hNatA is non-polysomal (Arnesen et al., 2005a) and a minor fraction of cytosolic hNaa10 exists independent of the NatA complex, carrying out post-translational acetylation as mentioned above (Van Damme et al., 2011b). Mammalian Naa10, Naa11 and Naa15 and Naa50 (isoforms) have been reported to be mainly localized in the cytoplasm and to a lesser extent to the nucleus (Fluge et al., 2002; Sugiura et al., 2003; Bilton et al., 2005; Arnesen et al., 2006a; Arnesen et al., 2006b; Chun et al., 2007; Xu et al., 2012; Park et al., 2014; Zeng et al., 2014). In mouse, an isoform specific localization of Naa10 has been described. mNaa10<sup>235</sup> was mainly nuclear in NIH-3T3 and JB6 cells whereas another variant mNaa10<sup>225</sup>, derived from alternative splicing at a different 3'-splice site, was mainly localized in the cytoplasm (Chun et al., 2007). In humans, Naa10<sup>225</sup> is absent and Naa10<sup>235</sup> was found to be evenly distributed in both cytoplasm and nucleus of HeLa and HT1080 cells as seen by immunofluorescence, confocal microscopy, and cell fractionation (Chun et al., 2007). Interestingly, Naa10 could be detected in nuclear fractions of doxorubicin treated HEK293 cells whereas a deletion construct lacking amino acids 1-35 could not be detected suggesting that a nuclear localization signal (NLS) resides in the N-terminal part of Naa10 (Park et al., 2012). Sequence analysis had previously identified a putative NLS more C-terminally in Naa10 between residues 78 and 83 (KRSHRR) (Arnesen et al., 2005a). In agreement with that, deletion of this NLS<sub>78-83</sub> almost completely abrogated nuclear localization of Naa10, whereas Naa10 wild type was imported to the nuclei of proliferating HeLa and HEK293 cells, especially during S phase (Park et al., 2014). Furthermore, the deletion of NLS<sub>78-83</sub> altered the cell cycle and the expression levels of cell cycle regulators and resulted in cell morphology changes and cellular growth impairment, all of which was mostly rescued when the nuclear import of hARD1 was restored by exogenous NLS (Park et al., 2014). It should be noted that Arnesen *et al.* reported that neither leptomycin B nor actinomycin D significantly changed the localization patterns of Naa10 in HeLa cells, indicating that Naa10 is not actively imported through importin  $\beta$ -dependent mechanisms (Arnesen et al., 2005a).

Naa15 also harbors a putative NLS between residues 612-628 (KKNAEKEKQQRNQQKKK), however, only Naa10 was found to be localized in the nuclei of HeLa, GaMg, HEK293, MCF-7 and NB4 cells, whereas Naa15 was predominantly localized in the cytoplasm (Arnesen et al., 2005a). In contrast to this, a different study showed that Naa15 localizes to the nucleus where it interacts with the osteocalcin promoter, as shown by cellular fractionation and ChIP experiments in MC3T3E1 calvarial osteoblasts (Willis et al., 2002). Further studies have to resolve these discrepancies and analyze possible cell-type specific differences. Besides that, it has been shown that Naa10 associates with microtubules

Date: 2015-01-28

in dendrites in cultured neurons (Ohkawa et al., 2008) and Naa15 colocalizes with the actin-binding protein cortactin and the F-actin cytoskeleton in the cytoplasm IEM mouse and RF/6A rhesus endothelial cells (Paradis et al., 2008).



## 2 MAMMALS

### 2.1 Naa10 function in mammals

The N<sup>α</sup>-acetyltransferase NatA is expressed widely in many tissues and NatA N-termini are overrepresented in eukaryotic proteomes. As pointed out earlier, 80-90 % of soluble human proteins are fully or partially acetylated and nearly 40-50 % of all proteins are potential NatA substrates according to their sequence in *S. cerevisiae*, *D. melanogaster* and humans (Van Damme et al., 2011c; Starheim et al., 2012). In the current model, Naa15 links Naa10, Naa50 and possibly other factors like HYPK to the ribosome where NatA/Naa10 acetylates the N<sup>α</sup>-amino group of canonical substrates and NatE/Naa50 acetylates methionine followed by a hydrophobic amino acid in a co-translational manner (Figure 3). Some known canonical NatA substrates include PCNP (Arnesen et al., 2010), androgen receptor (Wang et al., 2012), caspase-2 (Yi et al., 2011),  $\alpha$ -tubulin (Ohkawa et al., 2008) and TSC2 (Kuo et al., 2010), although a wealth of proteomic studies in recent years has suggested many more (Arnesen et al., 2009b; Lange et al., 2014). Post-translational acetylation by non-ribosome-associated NatA or monomeric Naa10 might occur as well.

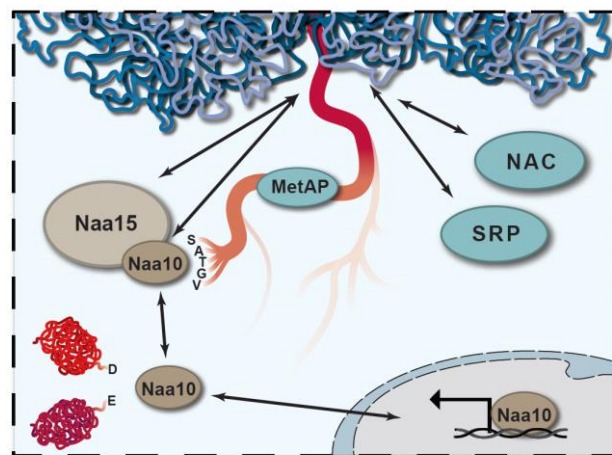

**Figure 3:** Multiple functions of Naa10. Associated with the ribosome in the NatA complex, Naa10 co-translationally acetylates the N<sup>α</sup>-terminal amino group of the nascent polypeptide chains of classical substrates as they emerge from the ribosome. Uncomplexed Naa10 post-translationally N<sup>α</sup>-acetylates proteins starting with acidic side chains and might also N<sup>ε</sup>-acetylate internal lysines. Furthermore, it has been suggested that Naa10 translocates into the nucleus where it acts in cooperation with transcription factors to modulate protein expression. Furthermore, Naa15 as well as the signal recognition particle SRP and nascent polypeptide-associated complex NAC might bind to similar regions on the ribosome near the exit tunnel (see below).

On the other hand, when Naa10 is not in a complex with Naa15, Naa10 adopts a different catalytic activity towards N-termini with acidic side chains. Presumably, this function occurs post-translationally in the cytosol, as Naa15 is necessary to link Naa10 to the ribosome (Figure 3). Substrates with acidic N termini include  $\gamma$ - and  $\beta$ -actin (Van Damme et al., 2011b). Proteins that have been reported to be substrates for  $\epsilon$ -acetylation at lysines by Naa10 include  $\beta$ -catenin (Lim et al., 2006; Lim et al., 2008) or HIF-1 $\alpha$  (Jeong et al., 2002; Yoo et al., 2006; Lee et al., 2010b) although there is controversy in the field whether HIF-1 $\alpha$  is an actual substrate of Naa10 or not (see below). Another ambiguous finding is that Naa10

Date: 2015-01-28

can translocate into the nucleus, regulating gene transcription, and this function might even be independent of its catalytic activity (Figure 3). In H1299 lung cancer cells e.g., Naa10 binds to nonmethylated DNA at the E-Cadherin promoter, directly interacts with DNMT1 (DNA methyltransferase 1) thereby recruiting DNMT1 resulting in silencing of the E-Cadherin promoter in a NAT-independent manner as analyzed by a Naa10-R82A mutant (Lee et al., 2010a). Similarly, the enzymatic activity is not necessary for Naa10 to significantly suppress migration, tumor growth, and metastasis in human cancer cells. Instead, Naa10 binds to the GIT-binding domain of PIX (Rho guanine nucleotide exchange factor 7), thereby preventing the formation of the GIT-PIX-Paxillin complex, resulting in reduced intrinsic Cdc42/Rac1 activity and decreased cell migration (Hua et al., 2011).

Due to its ubiquitous expression in almost all tissues and the broad substrate specificity of NatA, it is perhaps not surprising that many pathways and cellular functions/processes are regulated by NatA/Naa10 activity. This includes, as indicated above, regulation of gene transcription and cell motility. In this regard, it has been shown that overexpression or knock-down of Naa10 in HT1080 cells reduces migration and enhances invasion (Shin et al., 2009). The authors also reported that Naa10 interacts with activated (phosphorylated) MYLK (myosin light-chain kinase) and acetylates it at Lys<sup>608</sup>, thereby inactivating MYLK resulting in the dephosphorylation of MLC (Shin et al., 2009). Additionally, many other functions of Naa10 have been discussed including cyclin D1 regulation, regulation of DNA-damage response pathways, cellular hypoxia, apoptosis and cancer.

In *S. cerevisiae*, NatA function is not essential but disruption has other strong defects (see below). However, the *D. melanogaster* homolog of Naa10 (variable nurse cells; vnc) was found to be crucial for normal development and loss of Naa10 results in lethality. Particularly, disruptions of this gene result in pleiotropic oogenesis defects including abnormal cyst encapsulation, desynchronized cystocyte division, disrupted nurse cell chromosome dispersion, and eventual lethality for the animal, with homozygotes for *vncBdk* ( $\Delta NAA10$ ) perishing during the second larval instar” (Wang et al., 2010). Additionally, Naa10 is essential in controlling *C. elegans* life history (see below) and loss of the corresponding homologs in *T. brucei* is lethal as well (Ingram et al., 2000; Chen et al., 2014). Surprisingly, Naa10-knockout mice have very recently been reported to be viable, displaying a defect in bone development (Yoon et al., 2014). However, a full characterization of the Naa10 knockout in mouse remains to be published. Below, we will summarize and discuss the recent findings on Naa10 function. For a recent review on Naa10 function in cancer we refer the reader to (Kalvik and Arnesen, 2013).

### 2.1.1 Naa10 and cyclin D1 regulation

The proto-oncogene cyclin D1 forms a complex with CDK4/6 (cyclin-dependent kinase 4/6) and promotes G1/S cell cycle transition. The expression of cyclin D1 is tightly regulated by many factors including growth factor-dependent activation of the canonical MAPK (mitogen-activated protein kinase) pathway that stimulate the expression of AP-1 transcription factors (c-Fos and c-Jun), NF- $\kappa$ B signaling, cytokines through the JAK-STAT pathway and Wnt-signaling (Klein and Assoian, 2008).

Date: 2015-01-28

The Wnt signal transduction pathway is evolutionarily conserved and regulates many cellular functions including cell migration, cell polarity and embryonic development. In the canonical Wnt pathway, cytoplasmic  $\beta$ -catenin is marked for ubiquitination and proteasomal degradation by the  $\beta$ -catenin destruction complex composed of axin, APC (adenomatous polyposis coli), PP2A (protein phosphatase 2A), GSK3 (glycogen synthase kinase 3) and CK1 $\alpha$  (casein kinase 1 $\alpha$ ) in the absence of stimuli (Niehrs, 2012). Activation of Frizzled and its co-receptor LRP5/6 by secreted glycoproteins called Wnt disrupts the destruction complex, leading to a stabilization and accumulation of  $\beta$ -catenin that translocates to the nucleus where it participates in the regulation of LEF/TCF (Lymphoid enhancer-binding factor 1/T-cell factor) dependent genes like c-Myc, cyclin D1 or c-jun (Komiya and Habas, 2008). c-Myc inhibits the transcription of the cyclin kinase inhibitor p21<sup>(WAF1/CIP1)</sup> thereby activating cyclin-dependent kinases and promoting cell cycle progression (Gartel et al., 2001).

The first evidence for an implication of Naa10 in the regulation of cyclin D1 came from studies on the small lung cancer cell lines H1299 and A549. Knockdown of Naa10 by siRNA in these cells attenuated  $\beta$ -catenin acetylation, reduced the recruitment of  $\beta$ -catenin/TCF (T-cell factor) on cyclin D1 promoter in chromatin immunoprecipitations, and diminished the transactivation activity of a TCF-reporter assay (TOP-FLASH) resulting in a reduced cyclin D1 expression and proliferation inhibition (Lim et al., 2006). The direct interaction of Naa10 and  $\beta$ -catenin and the  $\epsilon$ -acetylation of  $\beta$ -catenin at lysine(s) could be shown in pulldown and in vitro acetylation assays with ectopically expressed proteins, respectively (Lim et al., 2006). A follow up study from the same group showed that this regulation has implications in hypoxic stress management. Naa10 forms a stable complex with  $\beta$ -catenin and acetylates  $\beta$ -catenin, which leads to the activation of TCF4 dependent genes, promoting cell proliferation under normoxic conditions, whereas HIF-1 $\alpha$  dissociates the  $\beta$ -catenin/Naa10 complex in hypoxia (Lim et al., 2008). Particularly, HIF-1 $\alpha$  competes via its oxygen-dependent degradation domain (ODDD) with  $\beta$ -catenin for Naa10 binding, thus leading to hypoacetylation and a repressed transcriptional activity of  $\beta$ -catenin including p21WAF1/CIP1-dependent growth arrest (Lim et al., 2008). In contrast to this, no changes in  $\beta$ -catenin expression or acetylation could be observed upon siRNA mediated depletion of Naa10 in CAL62 and 8305C cells (Gromyko et al., 2010). Interestingly, CAL-62 and 8305C cells, bearing p53 mutations, show little intrinsic  $\beta$ -catenin/TCF activity (Adam et al., 2012), whereas H1299 and A549 cells have activated  $\beta$ -catenin (Lim et al., 2006; Lim et al., 2008). This could indicate that activation of the  $\beta$ -catenin/TCF pathway is an essential requirement or prerequisite for Naa10 to acetylate  $\beta$ -catenin. However, another mechanism by which HIF could block  $\beta$ -catenin signaling without affecting  $\beta$ -catenin acetylation status has been described: HIF-1 $\alpha$  N-terminal domain directly competes with TCF4 for  $\beta$ -catenin complex formation, thereby inhibiting  $\beta$ -catenin/TCF4 transcriptional activity, resulting in a G1 arrest that involves c-Myc and p21WAF1/CIP1 under hypoxic conditions (Kaidi et al., 2007). Therefore, it has been speculated that the hypoxic repression of TCF4 is subject to double-checking by (at least) two distinct mechanisms: competitive disruption of the Naa10/ $\beta$ -catenin complex and disruption of the  $\beta$ -catenin/TCF4 transcriptional complex (Lim et al., 2008).

The enzymatic activity of Naa10 seems to be important for its ability to stimulate  $\beta$ -catenin/TCF transcriptional activity. Seo and colleagues showed that Naa10 undergoes

Date: 2015-01-28

autoacetylation at an internal lysine K136, which in turn increases its enzymatic activity towards other substrates, including  $\beta$ -catenin (Seo et al., 2010). Naa10 wild type augments LiCl-induced recruitment of  $\beta$ -catenin to the cyclin D1 promoter, amplifies TCF4 reporter in HEK293 cells, enhances cell growth/increased cell proliferation in A549, HeLa, and HEK293T cells, thereby leading to increased colony forming in an anchor-independent colony formation assay and increased tumor growth in mouse xenografts with H460 human lung cancer cells expressing wild type Naa10 (Seo et al., 2010). An autoacetylation-deficient mutant K136R mutant abrogated these effects indicating that the enzymatic activity of Naa10 and the resulting auto-acetylation is important for its signaling (Seo et al., 2010). In line with this, knockdown of endogenous Naa10 decreased luciferase activity in cyclin D1 reporter system and reduces cyclin D1 expression, which could be restored by Naa10 wild type but not by the K136R mutant (Seo et al., 2010).

Taken together, Naa10 seems to activate and/or amplify the transcriptional activity of  $\beta$ -catenin/TCF transcriptional activity thereby stimulating cyclin D1 and c-Myc expression leading to inhibition of p21<sup>WAF1/CIP1</sup> and promoting the G1/S cell cycle transition. This activation seems to be downstream of  $\beta$ -catenin stabilization, as the knockdown of Naa10 did not affect  $\beta$ -catenin ubiquitination or degradation (Lim et al., 2006).

As mentioned above, Naa10-depletion has been shown to decrease cyclin D1 levels and inhibit cell cycle promotion independently of  $\beta$ -catenin in CAL62 and 8305C cells (Gromyko et al., 2010). The authors speculate that Naa10 knockdown might induce the DNA-damage response network and p53-dependent apoptosis independent of  $\beta$ -catenin (Gromyko et al., 2010). In this regard, it should be mentioned that Naa10 might regulate cyclin D1 expression also via the MAPK (mitogen-activated protein kinase)-pathway. Phosphorylation/activation of the MAPK pathway activates Erk1/2 (extracellular signal-regulated kinase 1/2) and stabilizes c-Fos by direct acetylation, which then associates with c-Jun to form the transcriptionally active AP-1 (activator protein) complex that activates cyclin D1 (Cargnello and Roux, 2011). Knockdown of Naa10 significantly decreases phorbol ester TPA-induced phosphorylation of Erk1/2, attenuates c-Jun and c-Fos activation, decreases AP-1-recruitment to the cyclin D1 promoter and results in a repression of the AP-1 target genes including cyclin D1 (Seo et al., 2010). In conclusion, recent evidence indicates that Naa10-dependent acetylation regulates cyclin D1 through various pathways, including Wnt/ $\beta$ -catenin and MAPK. It should be noted that Naa10 has been shown to interact with STAT5a in *in vitro* association and immunoprecipitation assays, thereby inhibiting NF- $\kappa$ B-dependent *IL1B* (interleukin-1 $\beta$ ) expression and reducing STAT5a-dependent *ID1* (inhibitors of differentiation 1) expression (Zeng et al., 2014), which in turn could regulate cyclin D1 expression, as cytokines, such as interleukin-3 and interleukin-6, stimulate cyclin D1 promoter activity via STAT3 and STAT5 (Klein and Assoian, 2008). However, this has not been tested in the above study (Zeng et al., 2014).

Aside from cyclin D1, Naa10 has been linked to other factors implicated in cell-cycle and cell proliferation regulation. Naa10 has, for example, been identified in a yeast two-hybrid screen as an interaction partner of CDC25A (cell division cycle 25 homolog) that is required for G1/S cell cycle progression (Rual et al., 2005). Furthermore, Naa10 has been shown to physically interact with TSC2 (tuberous sclerosis 1-2 complex), an inhibitor of mTOR (mammalian target of rapamycin) (Kuo et al., 2010). Particularly, Naa10-dependent



Date: 2015-01-28

acetylation of TSC2 induced the stabilization of TSC2, repression of mTOR activity leading to reduced cell proliferation and increased autophagy of MCF-10A and MDA-MB-435 cells (Kuo et al., 2010). However, it should also be noted that other studies postulate that Naa10 does not regulate cell cycle progression, e.g. deficiency of Naa10/Naa15 had no effect on cell-cycle progression in HeLa and U2OS cells (Yi et al., 2011).

### 2.1.2 NF- $\kappa$ B/ DNA damage

Data generated from yeast indicates that Naa10 is involved in chromosomal stability, telomeric silencing and NHEJ repair (Aparicio et al., 1991; Ouspenski et al., 1999; Wilson, 2002). Indeed, a genome-wide RNA interference screen in *D. melanogaster* cells identified Naa10 as a regulator of apoptosis as a response to doxorubicin-induced DNA damage (Yi et al., 2007). Furthermore, Naa10 regulates cell death in response to doxorubicin in HeLa, HT1080, and U2OS cells (Yi et al., 2011) and apoptosis in response to the DNA damage inducer 5-fluorouracil in RKO and H1299 cells (Xu et al., 2012), indicating a function of Naa10 in DNA damage control. The dimeric transcription factor NF- $\kappa$ B (nuclear factor  $\kappa$ B) is activated by DNA-damaging drugs such as doxorubicin, daunorubicin and mitoxantrone, that intercalate into DNA and inhibit topoisomerase II as part of the cellular stress response (Karl et al., 2009). To date, five members of the NF- $\kappa$ B family are known: RelA (p56), RelB, c-Rel, NF- $\kappa$ B1 (p105/p50) and NF- $\kappa$ B2 (p100/52). In unstimulated cells, the I $\kappa$ B (Inhibitor of  $\kappa$ B) proteins, mask the nuclear localization signals of NF- $\kappa$ B proteins, thereby keeping them sequestered in an inactive complex in the cytoplasm (Huxford et al., 1998; Jacobs and Harrison, 1998). Activation of the classic/canonical NF- $\kappa$ B pathway by cytokines such as IL-1 (interleukin-1) or TNF $\alpha$  (tumor necrosis factor  $\alpha$ ) leads to the recruitment of several factors, including RIP1 (receptor-interacting protein 1), TRAF2 (TNF receptor-associated factor 2) and cIAPs (inhibitor of apoptosis proteins) that leads to the activation of IKK (I $\kappa$ B kinase), a complex of IKK $\alpha$ , IKK $\beta$  and NEMO (NF $\kappa$ B essential modifier). This complex phosphorylates and marks I $\kappa$ B for ubiquitination and subsequent proteasomal degradation, releases and activates NF- $\kappa$ B that then translocates into the nucleus and induces the transcription of downstream target genes (Hayden and Ghosh, 2012). In DNA damage, RIP1 forms a distinct complex with PIDD (P53 inducible death domain-containing protein) and NEMO in the nucleus. NEMO is subsequently SUMOylated and phosphorylated, resulting in the nuclear export of NEMO where it forms the IKK complex and activates NF- $\kappa$ B (McCool and Miyamoto, 2012).

Park and colleagues showed that siRNA-mediated knockdown attenuated, or overexpression of Naa10 increased, respectively, doxorubicin-induced RIP1/PIDD/NEMO complex formation, NEMO ubiquitination and NF- $\kappa$ B activation in HEK293 cells (Park et al., 2012). Specifically, Naa10 binds RIP1 via its acetyltransferase domain (aa45–130); however, the N-terminus as well a functional active acetyltransferase domain of Naa10 are necessary to induce NF- $\kappa$ B activation (Park et al., 2012). TNF $\alpha$ -induced NF $\kappa$ B activation was not affected by Naa10 knockdown (Yi et al., 2011; Park et al., 2012). In line with that, *in vitro* pull-down and co-immunoprecipitation assays in three cancer cell lines (RKO, H1299 and A549) showed that Naa10 directly interacts with NF- $\kappa$ B (RelA/p56) and contributes in NF- $\kappa$ B transcriptional activation of MCL1 (induced myeloid leukemia cell differentiation protein 1),

Date: 2015-01-28

thereby protecting cells from apoptosis (Xu et al., 2012). In contrast to this, a very recent report showed that overexpression or siRNA-mediated knockdown of Naa10 had no effects on cisplatin-induced DNA damage in A549 and H1299 cells (Shin et al., 2014), suggesting that Naa10 function in DNA damage depends on the stimulus as well as the cellular system.

On the other hand, Naa10 might also induce caspase-dependent cell death upon treatment with DNA-damaging drugs. In this regard it has been shown that Naa10 is essential for the activation of caspase-2/-3/-7 and -9 in HeLa cells after doxorubicin stimulation (Yi et al., 2007). Later studies by the same group showed that Naa10 directly acetylates Caspase-2, which induces its interaction with caspase-2 scaffolding complex RAIDD (RIP-associated ICH-1/CED-3 homologous protein with a death domain), and activation of Caspase 2 (Yi et al., 2011) thereby inducing apoptosis in response to DNA damage. Another study showed that Naa10 associates with I $\kappa$ B kinase  $\beta$  (IKK $\beta$ ) which phosphorylated Naa10 at Ser209, resulting in destabilization and proteasome-mediated degradation of Naa10 (Kuo et al., 2009), supporting the direct link between Naa10 and the NF- $\kappa$ B pathway and providing a possible feedback regulation of Naa10 during NF- $\kappa$ B signaling. In line with that, a recent study found that Runx2, a transcription factor in bone development, stabilizes Naa10 by inhibiting IKK $\beta$ -dependent phosphorylation and degradation of Naa10 (Yoon et al., 2014). Interestingly, Naa10 itself is degraded only at late stages of DNA-damage-induced apoptosis in HeLa and H1299 cells (Chun et al., 2007), which also might be a hint that it is important at early stages of DNA damage regulation.

It should be noted that Naa10 might also directly induce DNA-damage response pathways. hNata-depletion in HCT116 cells, for instance, itself activates DNA damage signaling through the  $\gamma$ H2AX and Chk2 sensing system, leading to p53 dependent apoptosis (Gromyko et al., 2010). In contrast to this, another study showed that Naa10 overexpression, but not siRNA-mediated knockdown, increased  $\gamma$ H2AX expression in A549 and H1299 cells upon treatment with oxidative stress, but had no effect in untreated cells (Shin et al., 2014). The reason for these discrepancies is not clear.

However, siRNA mediated knockdown of Naa10 in HeLa cells leads to apoptosis and sensitizes cells for daunorubicin-induced apoptosis (Arnesen et al., 2006c) and knockdown of Naa10 in the cancer cell line H1299 cells augmented the cellular response to doxorubicin (cell death and caspase-3 activation) (Lim et al., 2008). This is in clear contrast to before, as knockdown of Naa10 dramatically enhanced cell survival in the presence of doxorubicin in HeLa and *D. melanogaster* Kc<sub>167</sub> cells (Yi et al., 2007). These observed differences might be due to the context dependent regulation of NF- $\kappa$ B signaling and be dependent on the dose and duration of the applied drug. Recent reports show that, while DNA damage dependent NF- $\kappa$ B activation mediates protection of normal and malignant cells from DNA damage-induced apoptotic death, prolonged treatment or high dosing of cells with genotoxic chemotherapeutics rather induces apoptosis (involving ubiquitination of RIP1 and assembly of RIP1/NEMO/FADD/caspase-8) (McCool and Miyamoto, 2012).

However, it should be noted that Naa10 intrinsically is essential for cell survival in higher eukaryotes. Loss-of-function of Naa10 in *Drosophila* affects cell survival/proliferation and is lethal for the animal (Wang et al., 2010). Furthermore, knockdown of Naa10 impaired proliferation, induces cycle arrest and/or induces cell death as shown for different thyroid carcinoma and thyroid follicular epithelial cell lines (Gromyko et al., 2010), H1299 lung



cancer cells (Lee et al., 2010a), LNCaP cells (Wang et al., 2012), HeLa (Arnesen et al., 2010) and RKO and H1299 cells (Xu et al., 2012). For a recent review on Naa10 in tumor progression see: (Kalvik and Arnesen, 2013)

### 2.1.3 Naa10 in cellular hypoxia

The hypoxia-inducible factor (HIF) mediates the cellular response to low oxygen levels. HIF (hypoxia-inducible factors) is a heterodimeric transcription factor that regulates many cellular processes including proliferation, migration, differentiation, glucose metabolism and angiogenesis. HIF is composed of a constitutively expressed HIF1 $\beta$  subunit and one of the three HIF $\alpha$  subunits (HIF1 $\alpha$ , HIF2 $\alpha$ , HIF3 $\alpha$ ). Under normoxic conditions, HIF $\alpha$  is an exceptionally short-lived protein due to the O<sub>2</sub>-dependent hydroxylation of proline (Pro) or asparagine (Asn) residues by PHD (prolyl hydroxylase domain) proteins (Benizri et al., 2008). Particularly, hydroxylation of two conserved prolines (Pro<sub>402</sub> and Pro<sub>564</sub>) in the oxygen-dependent degradation domain (ODDD) of HIF-1 $\alpha$  recruits the E3-ubiquitin ligase, pVHL (von Hippel-Lindau), leading to ubiquitination and proteasomal degradation of HIF-1 $\alpha$ . Additionally, hydroxylation of HIF-1 $\alpha$  at Asn<sub>903</sub> within the C-terminal transactivation domain (C-TAD) by another hydroxygenase termed FIH (factor inhibiting HIF) abrogates the binding of the essential transcriptional co-activators p300/CBP, and hence the transcriptional activity of the HIF-1 $\alpha$  (Brahimi-Horn et al., 2007).

Under oxygen-limiting conditions, HIF $\alpha$  is stabilized, dimerizes with HIF $\beta$  and binds to site-specific sequences termed hypoxia response elements (HRE), recruits the co-activator p300/CBP and regulates the transcription of specific target genes like VEGF, glycolytic enzymes and erythropoietin. Another regulation of HIF-1 $\alpha$  that is independent of oxygen seems to involve Lysine K<sub>532</sub> in HIF-1 $\alpha$  (Tanimoto et al., 2000; Chun et al., 2003) and acetylation at this side chain accelerates HIF-1 $\alpha$  proteasomal degradation (Demidenko et al., 2005).

Early studies showed that mouse Naa10 expression is induced by hypoxia and enhances the interaction of HIF-1 $\alpha$  with VHL leading to HIF-1 $\alpha$  ubiquitination and proteasomal degradation (Jeong et al., 2002). HIF-1 $\alpha$  could be detected in immunoprecipitates with an acetyl-lysine antibody after induction of hypoxia or Naa10 transfection in HEK293 (Jeong et al., 2002), B16F10 and MKN74 (Lee et al., 2010b) and MCF-7 (Yoo et al., 2006) cells, suggesting an *in vivo* acetylation of HIF-1 $\alpha$  by Naa10, although this result was alternatively interpreted as an acetylated protein like p300/CBP and Hsp90 coprecipitating with HIF-1 $\alpha$  (Fath et al., 2006). Nevertheless, it could be shown that Naa10 directly binds to the oxygen degradation domain (ODD) of HIF-1 $\alpha$  and  $\epsilon$ -acetylates HIF-1 $\alpha$  at Lys532 *in vitro* (Jeong et al., 2002). Additionally, it has been shown that nickel (II) or cobalt (II), ions that are known to induce hypoxia-like stress, down-regulated Naa10 and FIH-1 mRNA in the human lung adenocarcinoma A549 cells (Ke et al., 2005). In contrast to this, several studies showed that human Naa10 expression is not affected in hypoxia and/or Naa10 does not acetylate and/or destabilize HIF-1 $\alpha$  (Arnesen et al., 2005b; Bilton et al., 2005; Fisher et al., 2005; Fath et al., 2006; Murray-Rust et al., 2006). Particularly, neither mRNA nor protein levels of Naa10 are regulated by hypoxia in HeLa, HT1080, HEK293 or MCF-7 cells, and overexpression or silencing of Naa10 has no impact on HIF-1 $\alpha$  stability (Bilton et

Date: 2015-01-28

al., 2005). Fisher and colleagues also found no effect of Naa10 knockdown in HIF-1 $\alpha$  protein level in HEK293T cells and HepG2 cells but detected that Naa10 is downregulated in a number of cell lines in response to hypoxia or hypoxia mimicking compounds (Fisher et al., 2005). Furthermore, knockdown of Naa10 decreases erythropoietin and VEGF protein production under normoxic and hypoxic conditions and suppressed proliferation (Fisher et al., 2005). In contrast, Arnesen and colleagues did not find a decreased Naa10 protein level in hypoxia in HT1080, RCC4, HeLa, MCF-7 and HEK293 cells, but could confirm the interaction of Naa10 with HIF-1 $\alpha$  ODD suggesting a putative, still unclear, connection between these proteins (Arnesen et al., 2005b).

More recently, a study suggested that different splicing forms from mouse and humans differentially regulate the cellular response to hypoxia. As mentioned earlier, 2 mouse (mNaa10<sup>225</sup> and mNaa10<sup>235</sup>) and 3 human (hNaa10<sup>235</sup>, hNaa10<sup>220</sup> and hNaa10<sup>229</sup>) isoforms of Naa10 that are generated by alternate splicing are listed in RefSeq (Pruitt et al., 2007). The used isoforms implicated in hypoxia are summarized in Table 1.

**Table 1: Transcript variants of human and murine Naa10 implicated in hypoxia.** Summary of the Naa10 isoforms that were used in hypoxia research including their accession number and corresponding citation. Two other isoforms have been reported in the literature including hNaa10<sup>131</sup> and mNaa10<sup>198</sup> (Kim et al., 2006) and that there exists a predicted transcript variant X1 hNaa10<sup>184</sup> (XM\_005277911) according to RefSeq that are not included in this table.

| name                  | Gene bank accession no + isoform |                      | Citation                                                                                                                                             |
|-----------------------|----------------------------------|----------------------|------------------------------------------------------------------------------------------------------------------------------------------------------|
| mARD1 <sub>235</sub>  | NM_019870                        | transcript variant 1 | (Sugiura et al., 2003; Chun et al., 2007)                                                                                                            |
| mARD1 <sub>225</sub>  | BC027219                         | transcript variant 2 | (Jeong et al., 2002; Yoo et al., 2006; Chun et al., 2007; Lee et al., 2010b)                                                                         |
| hARD1 <sub>235</sub>  | NM_003491                        | transcript variant 1 | (Arnesen et al., 2005b; Bilton et al., 2005; Fisher et al., 2005; Chang et al., 2006; Murray-Rust et al., 2006; Chun et al., 2007; Lim et al., 2008) |
| hNaa10 <sub>220</sub> | NM_001256119                     | transcript variant 2 |                                                                                                                                                      |
| hNaa10 <sub>229</sub> | NM_001256120                     | transcript variant 3 |                                                                                                                                                      |

The C-terminal domain (aa 158-225) of mouse Naa10<sup>225</sup> completely differs from mNaa10<sup>235</sup> and hNaa10<sup>235</sup> (Kim et al., 2006), whereas mNaa10<sup>235</sup> and hNaa10<sup>235</sup> share 96 % sequence similarity. All isoforms share an N-terminal N-Acyltransferase superfamily domain. Transfection of mNaa10<sup>225</sup> into HeLa cells strongly decreased the HIF-1 $\alpha$  protein and VEGF mRNA levels under hypoxia whereas both other variants had only minor effects (Kim et al., 2006). In immunoprecipitates isolated by an acetyl-lysine antibody from HeLa cells treated with the proteasome inhibitor MG132, HIF-1 $\alpha$  could be detected when the cells were transfected with mNaa10<sup>225</sup> but was nearly undetectable when the cells were transfected with mNaa10<sup>235</sup> or hNaa10<sup>235</sup> (Kim et al., 2006). The authors conclude that mNaa10<sup>225</sup> increased the level of HIF-1 $\alpha$  acetylation under normoxic conditions whereas the two other analyzed variants had only weak effects. However, it still cannot be excluded that in these experiment another, yet not identified, acetylated protein co-precipitates with HIF-1 $\alpha$ . Moreover, it is not clear whether Naa10 directly acetylates HIF-1 $\alpha$  or if another acetyl transferase is involved that is stimulated by Naa10. Anyway, the expression pattern of Naa10 isoforms was analyzed

Date: 2015-01-28

by western blotting in the human cervical adenocarcinoma HeLa, fibrosarcoma HT1080, in the lung adenocarcinoma H1299 cell line, as well as in the murine fibroblast cell line NIH3T3. Interestingly, hNaa10<sup>235</sup> was identified as the major form in the human cell lines, whereas mNaa10<sup>235</sup> and mNaa10<sup>225</sup> were both detected in the murine cell line (Kim et al., 2006), indicating, that – at least in human cells – the shorter Naa10 variant plays only a minor role in hypoxia response.

Other studies suggest that the regulation of HIF-1 $\alpha$  by Naa10 might require other factors/regulators such as deacetylases and/or may include different signaling pathways. In this context, it has been shown that the suppression of HIF-1 $\alpha$  by Naa10 is dependent on the expression level of MTA-1 (metastasis-associated protein 1) a component of the nucleosome remodeling and histone deacetylase (HDAC; NuRD) complex. Upon CoCl<sub>2</sub>-induced hypoxia, MTA-1 is expressed, binds to the ODD and C-terminal domain of HIF-1 $\alpha$ , stimulates deacetylation of HIF-1 $\alpha$  at Lys532, thereby stabilizing HIF-1 $\alpha$  and enhancing its interaction with HDAC1 leading to increased transcriptional activity (Yoo et al., 2006). Trichostatin (TSA), a potent specific inhibitor of HDAC, increases acetylation of HIF-1 $\alpha$  and decreases HIF-1 $\alpha$  stability (Yoo et al., 2006). Therefore the authors speculate that MTA-1 may counteract Naa10 in the regulation of HIF-1 $\alpha$  stability by activating HDAC1. In contrast to this, it has been shown that TSA does not induce acetylation or regulate stability of HIF-1 $\alpha$  but induces hyperacetylation of p300 thereby reducing the interaction of p300 with HIF-1 $\alpha$  repressing the transactivation potential of HIF- $\alpha$ /p300 complex in HeLa cells (Fath et al., 2006). Similarly, it could be shown that Naa10 transfection had no effect on hypoxia-induced stabilization of HIF-1 $\alpha$  in HeLa, HepG2 and MCF-7 cells that express high levels of MTA-1, but suppresses stabilization in HEK293 cells (expressing low levels of MTA-1) (Yoo et al., 2006). Under normoxic conditions, MTA-1 expression is repressed and overexpressed HIF-1 $\alpha$  is proteasomal degraded upon Naa10 transfection even in MCF-7 cells (Yoo et al., 2006). These findings indicate that the expression level of MTA-1 as well as cellular oxygen status might impact Naa10 function in regulating HIF-1 $\alpha$  signaling. The pro-fibrotic connective tissue growth factor (CTGF) can also regulate angiogenesis by interacting with VEGF. Interestingly, transfection of the human lung adenocarcinoma cells CL1-5 and A549 with CTGF leads to increased Naa10 expression levels, increased HIF-1 $\alpha$  acetylation, enhanced its interaction and ubiquitination with/by VHL and accelerated the proteasomal degradation of HIF-1 $\alpha$  (Chang et al., 2006). Additionally, knockdown of Naa10 with antisense decreased the level of acetylated HIF-1 $\alpha$  and restored VEGF-A expression in these cells (Chang et al., 2006). Therefore the authors hypothesize that the Naa10-dependent regulation of HIF-1 $\alpha$  might be dependent on CTGF and speculate that certain cellular proteins are induced by CTGF that work coordinately with Naa10 to affect HIF-1 $\alpha$  protein stability.

A different study showed that Naa10<sup>235</sup> regulates the response to hypoxia through a different pathway, suggesting crosstalk between HIF-1 $\alpha$  and Wnt-signaling pathway. In cells with activated Wnt-signaling, HIF-1 $\alpha$  competitively dissociates Naa10 from  $\beta$ -catenin preventing its acetylation under hypoxic conditions (Lim et al., 2008). This in turn represses  $\beta$ -catenin/TCF4 transcriptional activity, resulting in c-Myc suppression and p21(cip1) induction and proliferation inhibition (Lim et al., 2008). In this context, studies from APC<sup>Min/+</sup> mice are very interesting. These mice harbor a Min (multiple intestinal neoplasia) mutation

Date: 2015-01-28

leading to a truncated version of APC (adenomatous polyposis coli), a component of the  $\beta$ -catenin-destruction complex. Whereas the APC knockout is embryonic lethal, heterozygous mice expressing this variant are viable but spontaneously develop intestinal polyps.  $Apc^{Min/+}/mNaa10^{225}$  mice (generated by crossbreeding  $Apc^{Min/+}$  and mice expressing  $mNaa10^{225}$  from the actin promoter) are characterized by a decreased polyp size and number, and the tumors contain a decreased VEGF-A level and microvessel density compared to  $Apc^{Min/+}$  mice (Lee et al., 2010b). Furthermore, expression of  $mNaa10^{225}$  in B16F10 and MKN74 reduced endogenous HIF-1 $\alpha$  protein and VEGF-A mRNA and protein levels under hypoxia and suppressed migration, whereas co-expression of HIF-1 $\alpha$  K532 mutant abolished these effects (Lee et al., 2010b).

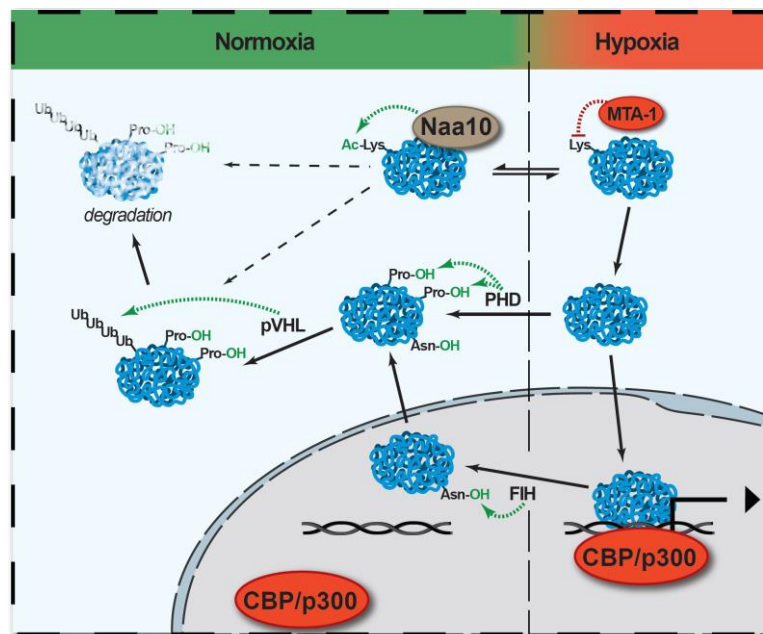

**Figure 4:** Possible role of Naa10 in cellular hypoxia. Under normoxic conditions, HIF1 $\alpha$  is hydroxylated by PHD proteins on prolines, leading to the subsequent ubiquitination by pVHL and rapid proteasomal degradation of HIF1 $\alpha$ . Furthermore, hydroxylation of Asn<sub>903</sub> by FIH disrupts binding of HIF1 $\alpha$  to its transcriptional co-activators p300/CBP, and hence the transcriptional activity of the HIF-1 $\alpha$ . Many reports have shown a direct interaction of Naa10 with HIF-1 $\alpha$ , suggesting a link in this pathway. Naa10 might either directly or indirectly stimulate HIF1 $\alpha$  lysine acetylation, thereby destabilizing HIF1 $\alpha$ , possibly through promoting its interaction with pVHL and PHDs. MTA1 counteracts the action of Naa10 by recruiting HDAC1 which leads to a deacetylation and subsequent stabilization of HIF-1 $\alpha$ .

Somewhat related to this is a study that analyzed Naa10 regulation in oxidative stress response. Under normoxic conditions, reactive oxygen species (ROS) are inevitable generated and enzymes have evolved to counteract these metabolites. One such enzyme is the methionine sulfoxide reductase (MSR) that consists of MSRA (methionine sulfoxide reductase A) and MSRB (methionine sulfoxide reductase B) that reduce S-sulfoxide and R-sulfoxide, respectively. Naa10 interacts with MSRA and acetylates it on K49 thereby inhibiting MSRA activity as shown in *in vitro* assays (Shin et al., 2014). Furthermore, Naa10 overexpression in A549 and H1299 cells or transgenic mouse (overexpressing Naa10 in kidney and liver) reduced MSRA activity as measured by an increase of ROS, thereby promoting cell death (Shin et al., 2014). The authors speculate that Naa10 regulation in

Date: 2015-01-28

hypoxia might be related to its role in oxidative stress, as intracellular ROS increases during hypoxia; however, the mechanism remains unclear.

Although the direct interaction of Naa10 and HIF-1 $\alpha$  is widely accepted and indicates a link between Naa10 and hypoxia, the physiological significance of Naa10 in this context is still unclear (Figure 4). It seems quite established that HIF-1 $\alpha$  acetylation at K532 is a destabilizing factor in normoxia. However, further studies have to address the following questions:

- Is HIF-1 $\alpha$  K532 directly acetylated by Naa10? Many studies have questioned this idea and the use of anti-lysine-antibodies is prone to misinterpretation as the position of acetylation is not defined. p300 itself for example acetylates HIF-1 $\alpha$  at K709 thereby regulating its stability (Geng et al., 2012) and changes in the acetylation status on this position would affect the above assay.
- If Naa10 does not directly acetylate HIF-1 $\alpha$  K532, does it promote its acetylation indirectly? If so, what is the unknown enzyme and how does Naa10 regulate its target recognition/catalytic activity?
- What effect does the cellular status have on Naa10 function in normoxic/hypoxic conditions? Several studies show that Naa10 function in hypoxia depends on other factors including MTA-1, CTGF and  $\beta$ -catenin. The activation of some of these pathways in different model systems could explain some of the observed discrepancies. For example, MTA-1 expression strongly correlates with hypoxia and some cells only weakly express MTA-1 under normoxic conditions (Yoo et al., 2006). Additionally, HIF-1 $\alpha$  and  $\beta$ -catenin are deregulated in many cancers (Zhong et al., 1999; Talks et al., 2000; Clevers and Nusse, 2012) and therefore might be deregulated in many cancer-derived cell lines. How does that influence the action of Naa10 in hypoxia? Therefore, the choice of the cell system to study might strongly influence the outcome of Naa10 knockdown or overexpression.
- What are the isoform-specific Naa10 effects and what are the differences between species? In mouse, mNaa10<sup>225</sup> had a strong effect on HIF-1 $\alpha$  acetylation and stability, whereas mNaa10<sup>235</sup> and hNaa10<sup>235</sup> had only minor effects. However, all isoforms interact with HIF-1 $\alpha$  and possess an N-terminal acetyltransferase domain. Therefore the differences in the regulation remain unclear. Furthermore, unlike in mouse, in human cell lines, mainly Naa10<sup>235</sup> is expressed, which seems to differ in its functionality from mNaa10<sup>225</sup> (Kim et al., 2006).

#### 2.1.4 Naa10 in bone formation

In the early phase of bone development, runt-related transcription factor 2 (Runx2) regulates osteoblast differentiation through transactivation of many genes including collagen  $\alpha$ 1, osteopontin, bone sialoprotein (BSP) and osteocalcin (OCN). A recent study showed that Naa10 interacts with the RUNT domain of Runx2, acetylates it at Lys225, and disrupts Runx2/CBF $\beta$  interaction, thereby inhibiting Runx2 transcriptional activity as shown in *in vitro* association, acetylation assays, and reporter gene assays, respectively (Yoon et al., 2014). Additionally, knockdown of Naa10 augmented the stimulatory effects of BMP-2 on osteoblastogenesis in a rat calvarial critical-size defect model and enhanced the differentiation



Date: 2015-01-28

in primary mouse osteoblasts (Yoon et al., 2014). Furthermore, overexpression of Naa10 in transgenic mice resulted in calvarial fontanelles being less closed and bones being less dense, a lower osteoblast surface and reduced mRNA of osteoblastic genes (delayed bone development), whereas Naa10 knockout mice exhibit normal skeletal structure at day 3 after birth and bones developed to a greater extent, supporting the idea that Naa10 functions in Runx2-mediated osteogenesis *in vivo* (Yoon et al., 2014).

Naa15 also has been implicated in osteogenesis. Studies of the osteocalcin promoter identified Naa15, Ku70 and Ku80 as possible regulators. These proteins bind the osteocalcin promoter and activate osteocalcin expression synergistically with Runx2, suggesting a functional interactions between Ku, Naa15, and Runx2 (Willis et al., 2002). In contrast to the above, Yoon and colleagues showed that knockdown of Naa15 does not influence BMP-2 induced osteoblast differentiation and does not affect the Naa10-dependent acetylation of Runx2 (Yoon et al., 2014).

### 2.1.5 Naa10 in neuronal development

An early study demonstrated that mNaa15 expression is temporally regulated in mouse brains during development (Sugiura et al., 2001). In a follow up study, *in situ* hybridization showed that mNaa10 and mNaa15 are highly expressed throughout mouse brain development in areas of cell division and migration, but are down-regulated as neurons differentiate and mitotic and migratory activities subside (Sugiura et al., 2003). Interestingly, during mouse brain development, Naa10 and Naa15 levels stay high in the olfactory bulb, neocortex, ventricular zone and hippocampus, regions where cell division and migration are still prominent in the neonate, suggesting that NatA plays an important role in the generation and differentiation of neurons (Sugiura et al., 2003). In line with that, it could be shown that the expression of Naa10 and Naa15 increases during neuronal dendritic development of cerebellar Purkinje cells, and knockdown of Naa10 significantly limited the dendritic extension of cultured neurons (Ohkawa et al., 2008). Furthermore, both proteins colocalize with microtubules (MTs) in dendrites, Naa10 rescues an arborization defect of HDAC6-(a major deacetylases of  $\alpha$ -tubulin)-overexpressing cells, and an immunopurified NatA complex acetylates purified  $\alpha$ -tubulin (Ohkawa et al., 2008). Tubulin acetylation is involved in neuron polarization, neurite branching and promotes vesicular transport on MTs in differentiated neurons (Perdiz et al., 2011). Therefore the authors speculate that Naa10 counteracts HDAC6 by acetylating  $\alpha$ -tubulin, thereby promoting MT stability for dendritic development. Interestingly, a different study suggests that HDAC6 reverses Naa10-mediated acetylation of Runx2, suggesting that HDAC6 might be a major counter player of Naa10 (Yoon et al., 2014).

However, other studies have shown that  $\alpha$ Tat1 ( $\alpha$ -tubulin K40 acetyltransferase) is a predominant/major  $\alpha$ -tubulin acetyltransferases *in vivo* in mammals and nematodes and fine-tunes hippocampus development (Shida et al., 2010; Kim et al., 2013). As a side note, in *D. melanogaster*, Naa50 has shown to acetylate  $\beta$ -tubulin at lysine252 on soluble tubulin heterodimers but not tubulins in MTs. thereby modulating MT polymerization (Chu et al., 2011). More studies are needed to elucidate the mechanism for how Naa10 regulates neuronal differentiation and what the involved substrates are.



## 2.1.6 Naa10 and disease

Accumulating evidence links Naa10 to neurodegenerative diseases. It has been shown that Naa10 binds via its 50 C-terminal amino acids to the cytoplasmic domain of the type I membrane protein amyloid precursor protein (APP) APP ( $\beta$ -amyloid precursor protein) and colocalizes with it in HEK293 cells (Asaumi et al., 2005). In Alzheimer's disease, APP gets processed into beta-amyloid ( $A\beta$ ) fragments that accumulate into plaques of abnormally folded proteins in the brain. Interestingly, overexpression of the NatA complex (Naa10 wild type/Naa15 wild type) in HEK293 cells decreases endocytosis of APP and suppresses  $A\beta$ 40 secretion, whereas the expression of an enzymatic-dead NatA (Naa10 R82A or G85A/Naa15 wild type) attenuated this suppression (Asaumi et al., 2005). However, the mechanism by which NatA regulates  $A\beta$  production remains unclear. Neither a direct acetylation of APP or any other of the involved proteins have been shown, and it is noteworthy that the N-terminus of APP faces outside of the cell. Aside from that, it has been shown that the natural C-terminal fragments of Tau (another Alzheimer's disease-associated protein), and  $\alpha$ -synuclein (associated with Parkinson's disease) are NTA, and the sequence properties point to NatB as the corresponding NAT. Indeed, NatB has been identified in a genetic screen for deletion mutants with mislocalisation of  $\alpha$ -synuclein, and the knockout of NatB diminishes the membrane localization of  $\alpha$ -synuclein in yeast (Zabrocki et al., 2008). Furthermore, NTA of  $\alpha$ -synuclein promotes its soluble, intrinsically alpha-helical structure, thereby inhibiting aggregation (Kang et al., 2012; Kang et al., 2013) and promoting membrane/vesicle binding (Maltsev et al., 2012; Bartels et al., 2014) and interaction with calmodulin (Gruschus et al., 2013). In contrast, NTA has been shown to be critical for  $\alpha$ -synuclein oligomer forming (Trexler and Rhoades, 2012) and no differences in the acetylation state for  $\alpha$ -synuclein in control or PD/DLB brain samples were found (Ohrfelt et al., 2011). In HeLa cells, N-acetylation does not significantly influence  $\alpha$ -synuclein fibrillization, synaptosomal membrane binding, or its subcellular localization in mammalian cells (Fauvet et al., 2012). Future work has to resolve these discrepancies and elucidate whether NTA regulates physiological dimer formation or pathological aggregation of  $\alpha$ -synuclein. For a recent review on this topic see (Alderson and Markley, 2013). On a sidenote, NatA function has been shown to regulate protein folding through the actions of chaperones, thereby promoting prion  $[PSI^+]$  propagation in yeast (see below), illustrating the important contributions of NTA to amyloidogenesis and its biological consequences (Holmes et al., 2014).

Recently, two families with an lethal X-linked disorder of infancy were described, with this new syndrome being named Ogden syndrome in honor of where the first family lives (in Ogden, Utah). The disorder comprises a distinct combination of an aged appearance, craniofacial anomalies, hypotonia, global developmental delays, cryptorchidism, and cardiac arrhythmias (Rope et al., 2011). Using X chromosome exon sequencing and a recently developed variant annotation, analysis, and selection tool (VAAST), a c.109T>C (p.Ser37Pro) variant in *NAA10* was identified (Rope et al., 2011). Functional analysis of this mutation revealed a decreased enzymatic activity of the S37P mutant in *in vitro* acetylation assays towards canonical (NatA) and new (likely monomeric Naa10) substrates (Rope et al., 2011), and further characterization of the catalytic activity ( $k_{cat}/K_m$ ) indicated that the S37P mutation possibly alters peptide substrate binding or release without affecting acetyl-CoA binding

Date: 2015-01-28

(Myklebust et al., 2014). Quantitative N-acetylome analyses (COFRADIC/MS) in a yeast model of Ogden syndrome revealed a reduced degree of NTA for a majority of NatA substrates in a yNatA knocked out strain (yNAA10Δ/yNAA15Δ) overexpressing the human NatA (hNaa15/hNaa10-S37P) mutant complex compared to a strain overexpressing the human NatA (hNaa15/hNaa10 wild type) complex (Van Damme et al., 2014). Similarly, quantitative analysis of the proteome wide acetylation degree in B-cells and fibroblasts from the Ogden families revealed a reduction of the *in vivo* acetylation status for a subset of N-termini of classical NatA substrates and some NatE substrates (Myklebust et al., 2014). Interestingly, co-immunoprecipitation experiments showed that the S37P Ogden mutation also decreased the interaction of Naa10 with Naa50, the catalytic subunit of NatE, providing a possible explanation for these findings (Myklebust et al., 2014). In yeast, immunoprecipitation assays from these strains with an anti-Naa15 antibody showed a 2 fold reduction in NatA complex formation and a reduced acetyltransferase activity of the mutated Naa10 compared to wild type (Van Damme et al., 2014). In agreement with that, immunoprecipitation experiments in HEK293 cells and patient fibroblasts showed a reduced NatA complex formation, disruption of Naa10-Naa50 interaction as well as a impaired enzymatic activity of Naa10-S37P (Myklebust et al., 2014). Interestingly, structural dynamic simulations of both, wild-type human NatA complex and the S37P mutant, showed perturbations of the hNaa10-hNaa15 interaction interface and changes in the flexibility of key regions for substrate binding which would explain the impaired Nt-acetyltransferase activity and complex stability of NatA-S37P (Myklebust et al., 2014). Taken together, this data suggests a diminished functionality of hNatA S37P *in vitro* and *in vivo*.

The functional consequences of the S37P mutation were studied in various models. In the recently developed Ogden syndrome heterologous yeast model, human NatA wild type rescued the sensitivity of the yNatA knockout strain towards caffeine and cycloheximide whereas the S37P mutant was qualitatively shown in yeast strain dotting to only partially rescue the phenotypes (Van Damme et al., 2014), indicating an increased sensitivity of the S37P cells towards stress. Fibroblasts from Ogden patients displayed altered morphology, growth and migration characteristics, possibly linked to a perturbed retinoblastoma (Rb) pathway, as Rb1 proteins levels were found to be increased; however, Naa10 protein levels or subcellular localization of Naa10 were unaffected in B-cells and fibroblast from Ogden males (Myklebust et al., 2014). These cellular studies indicate that the Ogden mutation induces changes in general cellular key features, including proliferation, and sensitizes cells towards stress. Interestingly, analysis of the X-chromosome inactivation pattern of the Ogden family revealed skewing of the affected allele in fibroblasts from carrier women, indicating a decreased fitness or production rate of these cells (Myklebust et al., 2014).

The mechanism for how reduced NTA acetylation of a subset of NatA substrates could induce the severe phenotype observed in Ogden syndrome is still unknown. However, now that some putative affected proteins are identified, further studies have to elucidate the specific consequences of a decrease in acetylation on the function of these proteins. In a first attempt, analysis of the stability of 7 affected proteins (reduced acetylation status) revealed no change of the steady state protein levels except for THOC7 (THO complex subunit 7 homolog), and mutations of THOC7 (G2V or G2P) that partially or completely abrogated NTA, respectively, strongly reduced steady-state protein level in A431cells, which could be

Date: 2015-01-28

rescued upon proteasomal inhibition (Myklebust et al., 2014). Similarly, siRNA-mediated knockdown of NatA decreased the half-life of THOC7 in cycloheximide chase experiments, indicating that NTA confers stability on THOC7 (Myklebust et al., 2014), which possibly contributes to the Ogden phenotype. However, further studies are necessary to affirm this assumption and analyze the effects of NTA-impairment on affected proteins.

Another group used exome sequencing to identify a R116W mutation in a boy and a V107F mutation in a girl in two unrelated families with sporadic cases of non-syndromic intellectual disabilities postnatal growth failure and skeletal anomalies (Rauch et al., 2012; Popp et al., 2014). A relative mild phenotype in the boy compared to a strong defect in the girl correlates with the remaining catalytic activity of Naa10 as measured in *in vitro* NTA assays, suggesting that the “N-terminal acetyltransferase deficiency is clinically heterogeneous with the overall catalytic activity determining the phenotypic severity” (Popp et al., 2014). In a study from 2013 where 106 genes proposed to be involved in monogenic forms of X-linked intellectual disability (XLID) were reassessed using data from the National Heart, Lung, and Blood (NHLBI) Exome Sequencing Project, the mutation in Naa10 reported in 2012 was marked as “awaiting replication” (Piton et al., 2013).

Another recent study implicated a mutation in *NAA10* in a single family with Lenz microphthalmia syndrome (LMS), a very rare, genetically heterogeneous X-linked recessive disorder characterized by microphthalmia or anophthalmia, developmental delay, intellectual disability, skeletal abnormalities and malformations of teeth, fingers and toes. Exome sequencing in this family with three affected brothers of LMS identified a splice mutation in the intron 7 splice donor site (c.471+2T→A) of *NAA10* (Esmailpour et al., 2014). Patient fibroblasts lacked expression of full length Naa10 protein and displayed cell proliferation defects, although it was not clear from the study if the control (wild type) cell lines were taken from unaffected family members or from completely unrelated individuals. STRA6, a retinol binding protein receptor that mediates cellular uptake of retinol/vitamin A and plays a major role in regulating the retinoic acid signaling pathway, was found to be dysregulated, as shown by expression array studies, and retinol uptake was decreased in patient cells (Esmailpour et al., 2014). Finding additional unrelated families with the exact same mutation, or at least other mutations in *NAA10* and also with this similar phenotype, will be very important, particularly as there is very little overlap between Ogden Syndrome and this phenotype. The field of human genetics has begun to coalesce around the notion that mutations should be found in more than one family prior to making strong assertions that any reported mutation really contributes to any particular phenotype being studied. In this regard, the two unrelated families with Ogden Syndrome were both found to have the exact same mutation, with perfect segregation in 5 affected boys in one family and in 3 affected boys in the other family, alongside not being found in several unaffected males in at least one of the families. However, even though this was reported in 2011, there have not yet been any reports of even a third family with the exact same mutation, thus highlighting the major issues with finding additional families, just as what appears to have occurred with these above singleton families.

However, accumulating evidence from *S. cerevisiae* suggests that phenotypic changes observed with NatA mutations can be based on the reduced acetylation status of multiple target proteins, as shown for the mating type switching (Geissenhöner et al., 2004; Wang et al., 2004) and the [PSI<sup>+</sup>] prion phenotype (Holmes et al., 2014) (see below). Therefore, the

observed discrepancies in the above studies might result from differences in the acetylation status of proteins and/or protein complexes as well as acetylation-induced global changes, including in protein biogenesis. This shows the inevitable need to study the effects of NTA on individual proteins as well as on more general level.

## 2.2 Function of Naa15/Naa16/Tubedown

In contrast to Naa10, the auxiliary subunit of the NatA complex, Naa15, is less intensively studied. Specific knockdown of hNAA16 in HEK293 cells induces cell death, suggesting an essential role for hNaa16p in human cells (Arnesen et al., 2009a). Furthermore, Naa15 is overexpressed in tumor cells in PTC (papillary thyroid carcinomas) and especially in a Burkitt lymphoma cell line indicating a function in the progression of papillary thyroid carcinomas, but heterologous expression of Naa15 did not alter the cellular proliferation rate (Fluge et al., 2002).

Recent studies suggest that Naa15 may play a role in the maintenance of a healthy retina. The expression of Naa15 during oxygen-induced retinal neovascularization in mice and in a specimen of stage 3 human retinopathy of prematurity (IHC) is suppressed, indicating that loss of retinal endothelial Naa15 expression is associated with retinal fibrovascular growth and thickening (Gendron et al., 2006). In line with this, Naa15 loss resulting from old age or conditional knockdown was associated with retinal lesions showing significant extravascularly localized albumin and correlated with increased activity of senescence (Gendron et al., 2010). Furthermore, in endothelial-specific-Naa15-knockdown mice a significant leakage of albumin from retinal blood vessels compared with control age-matched mice was observed contributing to the retinal pathology (Paradis et al., 2008). Naa15 interacts with the actin binding protein cortactin in cytoplasmic regions at the cortex of cultured endothelial cells thereby regulation endothelial cell permeability (Paradis et al., 2008).

Naa15 is also involved in tumor progression. Quantitative analysis of Naa15 expression in neuroblastic tumors (neuroblastomas, ganglioneuroblastomas, and ganglioneuromas) and normal adrenal tissues revealed that Naa15 is highly expressed in tumors with significant neuroblastic components, unfavorable histopathology, advanced stage, high-risk group, and poor outcome. Additionally, retinoic acid-induced neuronal differentiation responses of neuroblastoma cells were associated with a significant decrease in Naa15 expression, whereas limited neuronal differentiation responses to retinoic acid were associated with little or no decrease in Naa15 expression, indicating that Naa15 expression is linked to the differentiation status and aggressiveness of neuroblastic tumors (Martin et al., 2007).

## 2.3 Function of Naa50

In yeast (*S. cerevisiae*), deletion of the N<sup>α</sup>-terminal acetyltransferase Naa50 does not cause a detectable phenotype (Gautschi et al., 2003). However, early studies in *Drosophila* showed that Naa50 is required for establishing sister chromatid cohesion. Mutation of *Drosophila melanogaster* Naa50 (san/separation anxiety) disrupts centromeric sister chromatid cohesion, activates the spindle checkpoint, and causes metaphase delay or arrest

Date: 2015-01-28

(Williams et al., 2003). This function seems to be conserved in metazoans as indicated in a later study, where enzymatic active Naa50 was critical for sister chromatid cohesion in HeLa cells, independently of NatA, as shown in rescue experiments with a catalytic-defective Y124F mutant (Hou et al., 2007). However, the mechanism by which Naa50 regulates sister chromatid cohesion has not been elucidated. One possible substrate that matches the preferred N-terminal sequence for the NAT activity of hNaa50 is TIMELESS-interacting protein, a protein that is reportedly involved in chromatid cohesion (Evjenth et al., 2009). But, we have not found any published experimental data regarding this yet.

Recently, Naa50 was described to have  $\beta$ -tubulin acetyltransferase activity. Dynamic instability is a critical property of microtubules (MTs). Naa50 acetylates  $\beta$ -tubulin at a novel site (lysine 252) on soluble tubulin heterodimers but not on polymerized tubulins in MTs. After cold-induced catastrophe, MT regrowth was accelerated in Naa50-siRNA knockdown cells while the incorporation of acetylation-mimicking K252A/Q mutant tubulins was severely impeded (Chu et al., 2011). Because K525 interacts with the  $\alpha$ -tubulin-bound GTP, the authors propose that acetylation slows down tubulin incorporation into MTs by neutralizing the positive charge on K252, which allows tubulin heterodimers to form a conformation that disfavors tubulin incorporation.



### 3 NATA IN OTHER ORGANISMS

---

Since its first identification in a yeast screen (Whiteway and Szostak, 1985) homologues for Naa10 have been found in a variety of other organisms. In an early review, Polevoda and Sherman used the general BLAST server from the National Center for Biotechnology Information (NCBI) to identify orthologs of yeast NATs. They found candidates for Naa10 in *S. pombe*, *C. elegans*, *D. melanogaster*, *A. thaliana*, *T. brucei*, *D. discoideum*, *M. musculus* and *H. sapiens*, and orthologs for Naa50 were found in *S. pombe*, *C. elegans*, *D. melanogaster*, *A. thaliana* and *H. sapiens*, showing the generality of the NTA machinery in eukaryotes (Polevoda and Sherman, 2003b). Since then, many orthologs of Naa10 have been identified in a variety of different organisms. Also, a proteomic analysis comparison of acetylated proteins in *S. cerevisiae* and human HeLa cells revealed that the NatA substrate specificity is almost the same in both organisms indicating that the acetylation of proteins is evolutionary conserved (Arnesen et al., 2009b). Interestingly, in the archaea *S. solfataricus*, only a single ssNaa10 has been identified to date with a more relaxed substrate specificity (acetylating NatA, NatB and NatC-type substrates) (Mackay et al., 2007). A recent structural comparison of ssNaa10 with *S. pombe* Naa10 showed that the active site of ssNaa10 represents a hybrid of Naa10 and Naa50 and, as a result, can facilitate acetylation of Met- and non-Met-containing amino-terminal substrate peptides (Liszczyk and Marmorstein, 2013). Therefore, the authors suggest that this ssNaa10 is an ancestral NAT variant from which the eukaryotic NAT machinery evolved (Liszczyk and Marmorstein, 2013).

Naa10 homologues have also been identified in the protozoan parasites *Trypanosoma brucei* and *Plasmodium falciparum* (Ingram et al., 2000; Chang et al., 2008). In *T. brucei*, disruption of both alleles was lethal, indicating that Naa10 is essential.

#### 3.1 Naa10 in *C. elegans*

The *C. elegans* ortholog to Naa10 (abnormal dauer formation-31, DAF-31, K07H8.3) was first identified in a genetic screen to identify novel mutants affecting dauer and dauer-like larvae (Chen et al., 2014). In favorable environments, the embryonic development in *C. elegans* consists of four larval stages (L1-L4); however, when food is limited, the nematodes arrest at the L1 dauer diapause, a long-lived stress resistant stage (Fielenbach and Antebi, 2008). The insulin/IGF-1 signaling pathway regulates, among others, dauer and stress resistance in *C. elegans*. Activation of the insulin/IGF-1 transmembrane receptor (IGFR) ortholog DAF-2 results in the activation of a signaling cascade that eventually inhibits the DAF-16/FOXO (forkhead box O transcription factor) transcription factor, by promoting its sequestration in the cytoplasm, thereby negatively regulating dauer formation, longevity, fat metabolism and stress response (Murphy and Hu, 2013). The identified mutant animals (bearing a 393 bp deletion in the promoter and N-terminal region of *NAA10/daf-31*) formed dauer-like uncoordinated (Unc) larvae in the presence of dauer-inducing pheromones and under starvation, but unlike wild type animals, were sensitive to SDS and did not resume development when food was provided (Chen et al., 2014). Furthermore, overexpression of Naa10 stimulated transcriptional activity of DAF-16 thereby enhancing the longevity phenotype of DAF-2/insulin receptor mutants, indicating that Naa10 regulates *C. elegans*



Date: 2015-01-28

larval development dependent on the DAF-2/IGFR pathway (Chen et al., 2014). However, the exact mechanism remains unclear and the sequence of DAF-16 (starting with MQLE...) indicates that it is not a direct target for NTA by Naa10. Interestingly, in parallel with the above, another report was published implicating NatC in the regulation of stress resistance towards a broad-spectrum of physiologic stressors, including multiple metals, heat, and oxidation. Particularly, Naa35 (NATC-1, NatC auxiliary subunit, T23B12.4) is transcriptionally repressed by DAF-16 and mutations in *NAA35* or *NAA30* increased dauer formation, indicating that NatC is an effector of the insulin/IGF-1 signaling pathway downstream of DAF-16 (Warnhoff et al., 2014). Taken together, these data shows that NTA may play an important role in *C. elegans* development at different levels, although the exact mechanism for this action remains elusive. Interestingly, the ortholog of *NAA15* in *C. elegans*, *hpo-29*, was identified in an RNAi screen for genes that, when knocked down, result in hypersensitivity towards pore-forming toxins (Kao et al., 2011). However, the mechanism of this action was not analyzed.

### 3.2 NatA in Yeast (*S. cerevisiae* unless indicated otherwise)

The yeast *NAA10* gene was first identified in a genetic screen searching for mutants with an arrest-defective phenotype (mutants that exhibit a high proportion of budding cells and are resistant to mating  $\alpha$ -factor) and therefore named *ARD1* (arrest-defective) (Whiteway and Szostak, 1985). Later studies showed that *NAA15* knockout cells exhibit the same phenotype as a *NAA10* knockout: temperature sensitivity, a growth defect, de-repression of the silent mating type locus (*HML*) and failure to enter G<sub>0</sub> phase (Lee et al., 1989; Mullen et al., 1989), highlighting that both Naa10 and Naa15 function together to regulate gene silencing and mating in yeast. Interestingly, a later study found that disruption of NatA elevated protein aggregation and modulated the expression as well as the recruitment of molecular chaperones, including Hsp104 and Hsp70, to protein aggregates, potentially contributing to the observed heat sensitivity (Holmes et al., 2014). In agreement with that, overexpression of the Hsp70 protein Ssb1 partially suppressed the temperature sensitivity and derepression of the silent mating type loci caused by  $\Delta$ *NAA15* or  $\Delta$ *NAA10* (Gautschi et al., 2003). Furthermore, disruption of NatA (Naa10 or Naa15) affects general cell fitness as assayed by the ability of cells to restart their cell cycle when nutrients are added after starvation (Aragon et al., 2008; van Deventer et al., 2014).

#### 3.2.1 Mating type/silencing defect

In yeast, sexual reproduction is regulated by nonhomologous alleles, the mating type. The alleles of the mating type locus, *MATa* and *MAT $\alpha$* , encode for proteins specifically regulating the expression of sex specific genes. Two silent loci, *HML* and *HMR* are located on opposite sides of this locus and serve as donors during the recombinational process of mating type switching. In most strains, each *HML* and *HMR* contain a cryptic copy of the mating type sequences *MAT $\alpha$*  and *MATa*, respectively (Haber, 2012). Silencing of the *HML* and *HMR* loci, rDNA loci and telomeres is accomplished by trans-acting factors like Sir (silent information regulator) proteins that bind to specific silencer sequences, called HML-E, HML-I, HMR-E and HMR-I (Haber, 2012). Orc1p, the large subunit of the origin recognition complex (ORC),

Date: 2015-01-28

binds to the silencer and recruits Sir1p (Fox et al., 1997). The N-terminal domain of Orc1p is related to Sir3p and is required for mating type silencing (Bell et al., 1995). Binding of these proteins at the silencer region recruits the Sir2p/Sir3p/Sir4p complex. The histone deacetylase Sir2p deacetylates the tails of histone H3 and H4, establishing binding sites for Sir3p/Sir4p (they bind deacetylated tails of histones) (Steglich et al., 2013). This is thought to start a sequential recruitment of additional Sir proteins, leading to the deacetylation of further histones and spreading of Sir proteins along the silencer to repress the transcription in this region (Rusche et al., 2003). Similarly, silencing adjacent to telomeres is regulated in yeast, involving many of the components of the *HML/HMR* silencing machinery; however, telomeric silencing is less robust (Haber, 2012).

As mentioned before, it is well established that mutations in *yNAA10* prevent entry into stationary phase  $G_0$  and induce de-repression of the normally silent  $\alpha$  information at the *HML* locus, leading to a mating defect in *MATa* cells (Whiteway and Szostak, 1985; Whiteway et al., 1987; Aparicio et al., 1991). Interestingly, *MATa ard1* cells respond normally to **a**-factor (Whiteway and Szostak, 1985). Further studies showed that overexpression of Sir1p suppresses the mating defect of *yNAA10Δ/yNAA15Δ* cells (Stone et al., 1991). Comparing wild type and *NAA10Δ* mutant strains and biochemical analyses of Sir proteins revealed that NatA acetylates the N<sup>α</sup>-terminal alanine residues of Sir3 and of Orc1 bromo-adjacent homology (BAH) domain but not Sir2 and this is important for the silencing of *HML* (Wang et al., 2004). Interestingly, introducing either wild type Sir3 or Sir3-A2S, -A2G or -A2T mutants (all theoretically susceptible to acetylation by the NatA complex) restored the mating defect in *sir3Δ MATa* cells (Wang et al., 2004) whereas a *sir3Δ sir3-A2Q* mutant that abrogates acetylation by NatA had severe defect for silencing at *HML* and telomeres (Wang et al., 2004; Ruault et al., 2011). Interestingly, the introduction of Sir3-A2S mutant could restore the mating of *sir1Δ/sir3Δ* double knockout cells and only exhibited a slight telomeric silencing effect, whereas the Sir3-A2G or -A2T mutants all failed to mate in the absence of Sir1 (Stone et al., 2000; Wang et al., 2004; van Welsem et al., 2008). Taken together, these data suggest that mutation of the N-terminal alanine of Sir3 causes different phenotypes, ranging from a mild effect of the A2S mutation, an intermediate effect of the A2T or A2G mutations, to the A2Q mutation, displaying the strongest effects. Similar effects were shown for the *MATα* cells, although the characteristics of the mutations appears to be not as severe as for the *MATa* cells (Wang et al., 2004). In this context, a later study found an explanation for why NatA mutations preferentially de-repress the *HML* loci. When Sir3 becomes limiting, silencing at *HMR* is more stable than *HML*, indicating that the *HMR* locus is better able to sustain silencing at very low levels of Sir3 (Motwani et al., 2012). In agreement with that, weakening of *HMR-E* by using a synthetic variant that lacks much of the functional redundancy of natural silencer (*HMR SSAI*) leads to a strong mating defect upon disruption of *NAA15* (Geissenhöner et al., 2004).

An explanation for the impact of Sir3 acetylation on its function partly comes from structural studies of acetylated and non-acetylated forms of Sir3. *In vitro* studies of purified yeast chromatin fragments and Sir3 purified from wild type or *NAA10Δ* yeast showed a reduced interaction of the unacetylated BAH domain (compared to the acetylated form) with nucleosomes (Onishi et al., 2007; Sampath et al., 2009) and acetylated Sir3 formed Sir-nucleosome filaments, whereas the non-acetylated Sir3 formed short filaments with a

Date: 2015-01-28

different morphology (Onishi et al., 2007). The crystal structure of non-acetylated Sir3 indicated that the N-terminal BAH domain is disordered (Armache et al., 2011). In contrast to this, acetylated Sir3 exhibits a more structured N-terminus as demonstrated by the crystal structure of the N-terminal BAH domain of Sir3 bound to the nucleosome core particle (NCP) (Arnaudo et al., 2013). Particularly, the interaction of the N-terminal acetyl group and loop 3 of Sir3 appears to generate a rotation of the whole BAH domain toward the surface of the NCP, positioning helix 8 closer to the core histones and thereby stabilizing the interaction of Sir3 and the nucleosome (Arnaudo et al., 2013). Mutations within the N-terminal region that either prevent N-terminal methionine cleavage or replace the Ala at position 2 would disrupt this structure and reduce NPC binding as the residual initiator methionine would clash with Trp142 or long side chains would clash with the short N-terminal helix (Arnaudo et al., 2013).

Methylation of histones is another important mechanisms in regulating Sir3 function/silencing. Methylation of H3 K79 by Dot1 e.g. abrogates binding of Sir3 to histone H3 (Onishi et al., 2007; Wang et al., 2013). Furthermore, studies showed that N<sup>α</sup>-terminal acetylation of Sir3 enhances its specificity for nucleosomes that are unmethylated at H3K79 (van Welsem et al., 2008). The crystal structures of the unacetylated Sir3 suggests that methylation of H3K79 decreases the potential of this lysine to form hydrogen bonds with E84 and E140 in Sir3 that would potentially result in a decreased affinity Sir3 for the nucleosome (Armache et al., 2011). However, in the structure of the acetylated form a set of additional interactions with the nucleosome arising from the acetylated N-terminus of Sir3 can be observed and methylation of H3K79 would create repulsion with the residues in the acetylated BAH loop 3 (Arnaudo et al., 2013), which could explain the increased affinity of acetylated Sir3 towards nucleosomes and the increased sensitivity of acetylated Sir3 towards nonmethylated nucleosomes. In contrast to this, the silencing defects of weak Sir3 mutants such as *sir3-A2G* or *sir3-A2T* mutants could be suppressed by mutations in histones H3 and H4, specifically, by H3 D77N and H4 H75Y mutations but not by knockout of Dot1, indicating that methylation is not responsible for the silencing defect of these mutants (Sampath et al., 2009).

As indicated above, another protein that has been studied, in regards to a silencing defect in NatA mutants, is Orc1. The N-terminal BAH domain of Orc1 shares 50% identity with Sir3 and the first eight residues of both proteins are completely identical (Geissenhöner et al., 2004). Furthermore, similar to Sir3, Orc1 purified from wild type yeast is found to be acetylated, but unacetylated in *NAA10Δ* or *NAA15Δ* cells (Geissenhöner et al., 2004; Wang et al., 2004). Interestingly, tethering of Sir1 or Orc1 to the *HMR* silencer rescued the mating defect of *MATα* yeast *NAA15Δ* cells, indicating that the silencing defect works upstream of Sir1 and hence, through Orc1 (Geissenhöner et al., 2004). Mutations in the penultimate residue of Orc1 (Orc1-A2P and Orc1-A2V) that inhibited its ability to be acetylated by NatA caused a severe loss of telomeric silencing; however, silencing at *HML* or *HMR* was not disrupted in these mutants (Geissenhöner et al., 2004). This is in line with the idea that *HML/HMR* silencing is more robust than telomeric silencing (Haber, 2012) and also suggests that the silencing phenotype of *NAA10Δ* and/or *NAA15Δ* cells is caused by an acetylation deficiency of at least two proteins, Orc1 and Sir3.

### 3.2.2 NatA in ribosome function and protein targeting

As pointed out earlier, the NatA complex is – at least partially - associated with the ribosome. Besides that, it could also be proven that the ribosome itself is susceptible to acetylation by NATs. Edman degradation of ribosomal proteins from *S. cerevisiae* identified 14 proteins whose electrophoretic mobility suggest they carry an additional charge, presumably due to acetylation, in an *NAA15Δ* strain compared to the wild type (Takakura et al., 1992). Two other studies used two-dimensional difference gel electrophoresis (2D-DIGE) combined with mass spectrometric analysis to identify acetylated ribosomal proteins. In these studies, 30/19 of the of 68/60 identified ribosomal proteins were N<sup>α</sup>-terminally acetylated, and 24/17 of these were NatA substrates, only 4/2 were NatB substrates and two were unusual NatD substrates (Arnold et al., 1999; Kamita et al., 2011). These data give arises the question what the effect of this modification is on ribosome function.

A recent study suggests that NatA-dependent acetylation is necessary for ribosome biogenesis in conjunction with Ebp2. The nuclear protein Ebp2 is required for ribosome synthesis, especially for the maturation of 25S rRNA and assembly of 60S subunit. Mutation of nuclear protein Ebp2 (*ebp2-14* mutant) exhibited synergistic growth defects and defects in the biogenesis of 60S ribosomal subunit with *NAA10Δ* or *NAA15Δ* mutants, which could be repressed by overexpression of ribosomal protein eL36A (Wan et al., 2013). Indeed, eL36 was found to be N-terminally acetylated by NatA in one of the previous screens (Arnold et al., 1999). However, mutation of the second amino acid to proline in eL36A or eL36B did not exhibit the above mentioned effects, whereas mutation of Brx1 (*brx1-S2P*), a functional partner of Ebp2, led to synthetic lethality with *ebp2-14*, suggesting that Brx1 and not eL36A acetylation by NatA is important for ribosome biogenesis (Wan et al., 2013). It should be noted that, according to their sequence, all analyzed proteins in this study are putative NatA substrates. However, further studies are necessary to identify the exact acetylation targets that impact ribosome biogenesis to elucidate the mechanism by which NTA affects this process.

To analyze the impact of N<sup>α</sup>-terminal acetylation on translational activity, Kamita and colleagues performed a polyU-dependent poly-(Phe) synthesis assay with purified ribosomes from wild type and *NAA15Δ* strains (Kamita et al., 2011). The authors detected a decrease of the ribosomal protein synthesis activity by 27% in the mutant compared to wild type ribosomes and dilution spot assays revealed an increased sensitivity of the mutant cells towards the antibiotic paromomycin and hygromycin, but not anisomycin and cycloheximide. Anisomycin is a competitive inhibitor of A-site binding that sterically hinders positioning of the acceptor end of A-site tRNA in the peptidyl transferase center (PTC) on the 60S subunit of the ribosome, and cycloheximide is known to interfere with the translocation step in protein synthesis by blocking translational elongation. Paromomycin is a translational error-inducing antibiotic that binds to the decoding center on the ribosome's 40S subunit and promotes conformational changes affecting formation of the codon–anticodon helix between mRNA and tRNA at the A-site. Therefore, the authors speculate that N<sup>α</sup>-acetylation of ribosomal proteins by NatA has no specific effect on translocation or peptidyl transferase activity but may be required to maintain proper translational fidelity (Kamita et al., 2011). In a translational fidelity assay using a bicistronic reporter gene, elevated stop codon readthrough was observed in the *NAA15Δ* mutant strain compared to wild type, and this effect



Date: 2015-01-28

was strongly influenced by the addition of paromomycin, indicating that N<sup>α</sup>-acetylation by NatA is indeed required for optimal translational termination (Kamita et al., 2011).

In addition to the above, NatA-dependent acetylation could influence ribosome function through the action of ribosome-associated protein biogenesis factors (RPBs), which act on newly synthesized proteins as soon as they emerge from the ribosome exit tunnel. These RPBs regulate enzymatic processing, chaperone-assisted folding, and protein sorting. RPBs include the NATs, methionine aminopeptidases, signal recognition particle (SRP), as well as chaperones like the Ssb/Ssz/Zuotin triad and nascent polypeptide-associated complex (NAC). For a review, see (Kramer et al., 2009). Recent findings suggest that NatA regulates protein import into the endoplasmic reticulum (ER). In eukaryotes, this translocation process is mediated by the heterotrimeric Sec61 complex that consists of the yeast proteins Sec61, Sbh1 and Sss1. During co-translational translocation, the nascent polypeptide chain is recognized by the signal recognition particle SRP that, through its interaction with the SRP receptor, targets the ribosome nascent chain complex (RNC) to the membrane of the ER. The elongating polypeptide chain then is transferred to Sec61 and inserted into the channel. In contrast to this, posttranslational translocation requires, besides the Sec61 complex, also the Sec63 complex (Sec63, Sec62, Sec71 and Sec72) and the luminal chaperone BiP. Additionally, in yeast, another complex, called Ssh1, can be formed by Ssh1, Sss1 and Sbh2 that is exclusively responsible for co-translational import into the ER. For recent reviews, the reader is referred to (Robson and Collinson, 2006; Park and Rapoport, 2012; Akopian et al., 2013).

Interestingly, NatA preferentially associates with translating ribosomes but seems to discriminate ribosomes translating SRP substrates, as shown in cross-linking experiments of ribosome nascent chain complexes *in vitro* translating Pgk1, ppα-factor, and Dap2 (Raue et al., 2007) (see Table 2). In line with this, systematic bioinformatic studies of predicted N-terminal processing found that cytoplasmic proteins are typically biased in favor of acetylation, whereas secretory proteins are not (Forte et al., 2011). Furthermore, mutation of the penultimate amino acid of the post-transcriptionally targeted proteins CPY (carboxypeptidase Y), Pdi1 and ppα-factor that allowed acetylation by NatA inhibited their translocation, whereas this effect was restored in *NAA10Δ* cells (Forte et al., 2011). It should be noted that *NAA10Δ* cells itself showed no gross ER translocation defect for the ppα-factor, Sec62, or Pdi1 (Forte et al., 2011; Soromani et al., 2012). However, the artificial SRP-substrates OPY and D<sub>HC</sub>-α translocated normally and were found to be unprocessed, even after mutation of the N-terminus (Forte et al., 2011). Thus, the authors conclude that the N<sup>α</sup>-acetylation by Naa10 abolishes post-transcriptional, SRP-independent protein translocation *in vivo* but does not regulate SRP-dependent translocation. The authors argue that SRP could block the nascent polypeptide chain from N-terminal processing (Forte et al., 2011). In this context it is noteworthy that both SRP and NatA bind to the ribosome via uL23/uL29 at the tunnel exit (Pool et al., 2002; Halic et al., 2004; Polevoda et al., 2008), which supports the above findings (competitive binding of SRP and NatA for ribosome). In contrast to this, Soromani and colleagues found that two Sec proteins, Sec61 and Sec62, which are themselves targeted to the ER membrane in an SRP-dependent fashion, are acetylated by NatA (Soromani et al., 2012), indicating that NatA-dependent acetylation is still possible even if SRP is binding to specific RNCs. In this context it is interesting that additional ribosome binding



Date: 2015-01-28

sites of SRP have been identified. When SRP contacts the signal peptide and its receptor on the ER membrane, SRP is repositioned to the side opposite to uL23/uL29, freeing up uL23, allowing binding of Sec61 translocon (Pool et al., 2002). Also, NAC has been shown to bind uL23 (Wegrzyn et al., 2006), although other studies identified eL31 as the major ribosomal binding site of NAC (Pech et al., 2010; Zhang et al., 2012). However, different models suggest that SRP function is influenced by NAC and that this dynamic interplay is important for protein targeting to the ER (Zhang et al., 2012). Therefore, it would be interesting to see if and how NatA may be involved in this process and what the consequences are for the acetylation status of proteins.

As a side note, another Sec protein, Sbh1, is N-terminally acetylated by NatA, and because this protein is inserted by the guided-entry of tail-anchored protein insertion (GET) pathway, the authors conclude that this translocation pathway is also not affected by NTA (Soromani et al., 2012) (Table 2).

**Table 2: Summary of the used proteins/artificial constructs used in the mentioned studies to analyze protein targeting.** Pgk1 is a cytosolic protein and not targeted to the ribosome. Sbh1 is targeted by guided-entry of tail-anchored protein insertion (GET) pathway. SRP-dependent = co-translational targeting to ER vs post-translational targeting

| name  | N-terminal domain                           | artificial construct | targeting       | NatA | Ref.                                                               |
|-------|---------------------------------------------|----------------------|-----------------|------|--------------------------------------------------------------------|
| Pgk1  | 3-phosphoglycerate kinase                   | -                    | -               | -    | (Raue et al., 2007)                                                |
| OPY   | oligosaccharyltransferase $\alpha$ -subunit | +                    | SRP-dependent   | -    | (Forte et al., 2011)                                               |
| dap2  | dipeptidyl aminopeptidase                   | -                    |                 | -    | (Raue et al., 2007)                                                |
| DHC   | dipeptidyl aminopeptidase                   | +                    |                 | -    | (Forte et al., 2011)                                               |
| Pho8  | Repressible vacuolar alkaline phosphatase   | -                    |                 | -    | (Soromani et al., 2012)                                            |
| Sec61 | subunit of Sec61 complex                    | -                    |                 | +    | (Soromani et al., 2012)                                            |
| Sec62 | subunit of Sec63 complex                    | -                    |                 | +    | (Soromani et al., 2012)                                            |
| pp2a  | prepro- $\alpha$ -factor                    | -                    | SRP-independent | -    | (Raue et al., 2007; Forte et al., 2011)<br>(Soromani et al., 2012) |
| Pdi1  | protein disulfide isomerase                 | -                    |                 | -    | (Forte et al., 2011; Soromani et al., 2012)                        |
| CPY   | carboxypeptidase Y                          | -                    |                 | -    | (Forte et al., 2011; Soromani et al., 2012)                        |
| Sbh1  | subunit of Sec61 complex                    | -                    | GET             | +    | (Soromani et al., 2012)                                            |

### 3.2.3 NatA and proteasome function

The proteasome is an ATP-dependent protease consisting of a cylinder-shaped 20S core flanked by a 19S regulatory subcomplex. The regulatory particle is organized in a lid (regulatory particle non ATPase Rpn3, -5, -9, -11, -12, -15) and a base comprised of the organizing subunits Rpn1 and Rpn2, the ubiquitin receptors Rpn12 and Rpn13, as well as 6 AAA-ATPases (regulatory particle triple A protein1-6, Rpt1-6), that unfolds the respective substrate, opens the gate and translocates the substrates into the 20S core. The 20S core consists of 4 stacked heptameric ring structures, two outer rings that are composed of 7

Date: 2015-01-28

structural  $\alpha$  subunits and 7 catalytic  $\beta$  subunits that exhibit protease activity in the center of the particle. For a recent review see (Bhattacharyya et al., 2014).

Some of the catalytic  $\beta$ -type subunits of the 20S core are synthesized as catalytically inactive forms with an N-terminal propeptide, which is then cleaved during particle assembly. Incomplete propeptide removal results in severe assembly defects of the proteasome (Groll et al., 1997). Mutants in  $\beta 5$ ,  $\beta 2$  and  $\beta 1$ , which lack the N-terminal propeptide, are defective for specific peptidase activity, are more sensitive to environmental stresses, and have defects in proteasome assembly (Arendt and Hochstrasser, 1999). Deletion of *NAA10* or *NAA15* restores the phenotype, indicating that the propeptide protects the N-terminal threonine of the mature form against acetylation (Arendt and Hochstrasser, 1999). A similar study showed that the deletion of the N-terminal propeptides of the  $\beta 1$ ,  $\beta 2$  subunit precursors drastically inhibited the enzymatic activity of the proteasome (Jäger et al., 1999). Further chemical analyses revealed that acetylation of the N-terminal threonine in  $\beta 1$  is responsible for the measured activity loss, supporting the idea that the propeptide protects the mature subunit moiety from being acetylated prior to incorporation into the proteasome complex (Jäger et al., 1999). The authors also propose a similar mechanism for  $\beta 2$  and  $\beta 5$ ; however, the N-termini have not been analyzed for NTA (Jäger et al., 1999). Taken together, this indicates that the expression of the  $\beta$ -chains together with the propeptide is a natural mechanism to circumvent acetylation of an N-terminus that is important for catalytic function.

Furthermore, acetylation of other components of the proteasome has been identified *in vivo*. Purified 20S proteasome subunits from wild type, *NAA10Δ*, *NAA20Δ* and *Naa30Δ* mutant cells indicated that the  $\alpha 1$ ,  $\alpha 2$ ,  $\alpha 3$ ,  $\alpha 4$ ,  $\alpha 7$ , and  $\beta 3$  subunits were acetylated by NatA, the  $\beta 4$  subunit was acetylated by NatB and the  $\alpha 5$  and  $\alpha 6$  subunits were acetylated by NatC (Kimura et al., 2000). In a similar approach for the 26S regulatory subunit, the same group found that 8 subunits, Rpt4, Rpt5, Rpt6, Rpn2, Rpn3, Rpn5, Rpn6, Rpn8, Rpn13 and Rpn15 were NatA substrates and that 2 subunits, Rpt3 and Rpn11, were NatB substrates, whereas Rpt1 was unprocessed (Kimura et al., 2003; Kikuchi et al., 2010). Although these data indicates that a multitude of proteasomal factors are acetylated *in vivo*, little is known about the functional consequences of this modification and the so far analyzed effects seem to be relative small. Analysis of the 20S proteasomes derived from either *NAA15Δ* mutant cells revealed a very similar *in vitro* activity compared to wild type-derived proteasomes with respect to chymotrypsin-like, trypsin-like, and peptidylglutamyl peptide hydrolyzing activities (Kimura et al., 2000). In the absence of the chaotropic agent SDS, which is used in the *in vitro* assay to induce activity of the 20S proteasome, the *NAA15Δ* proteasomes displayed a twofold-higher chymotrypsin-like peptidase activity (Kimura et al., 2000). However, crude proteasome extracts from the wild type strain and the *NAA15Δ* deletion mutant exposed a similar accumulation level of the 26S proteasome in *in vitro* and exhibited normal chymotrypsin-like activity in the presence of ATP (Kimura et al., 2003). On the other hand, the accumulation level of 20S proteasome and the chymotrypsin-like activity were appreciably higher in the extracts from the *NAA15Δ* deletion mutant (Kimura et al., 2003), indicating that NTA might have a suppressing role in proteasome function.

In contrast to this, data generated with *H. volcanii* suggests that acetylation is required for the assembly of the 20S core particle. In this archaea, the structural proteins  $\alpha 1$  and  $\alpha 2$  are acetylated on their initiator methionine (Humbard et al., 2006). Interestingly, the acetylated

Date: 2015-01-28

form of  $\alpha 1$  was almost exclusively found in purified S20 core particles, even after the cellular ratio of acetylated/non-acetylated  $\alpha 1$  was changed by mutation of the penultimate amino acid, indicating that the acetylated protein is preferably inserted into the core particle (Humbard et al., 2009). However, it should be noted that the observed changes on methionine cleavage or NTA of  $\alpha 1$  that were introduced by mutation of its penultimate residue did not follow the classical rules. Variants of  $\alpha 1$  with ser, thr or val and even pro were found to be acetylated on the initiator methionine instead of the penultimate amino acid after methionine processing. The reason for this unexpected behavior is not clear. Recently, the effect of NTA on nuclear-cytoplasmic shuttling of proteasomes during starvation was analyzed. In *S. cerevisiae*, proteasomes accumulate in the nucleus; however, during starvation, proteasomes are relocalized into the cytosol and stored into cytoplasmic proteasome storage granules (PSG). This shuttling efficiency ceases with age (impairment of proteasome relocalization and/or PSG formation correlates with replicative age). Interestingly, NatC auxiliary subunit Naa35 was identified in a yeast screen for mutants affecting nuclear-cytoplasmic shuttling during starvation (van Deventer et al., 2014). Additionally, loss of N-acetylation by deletion of the NatC subunits Naa30, Naa35 or Naa38 or a catalytically inactive NatC mutant (Naa30 N123A/Y130A) caused an increased nuclear enrichment/retention of the proteasomes under starvation without affecting PSG formation as visualized by tagging the catalytically active  $\beta 1$ -subunit (Pre3) of the proteasome with GFP (van Deventer et al., 2014). Disruption NatB (*NAA20 $\Delta$*  and *NAA25 $\Delta$* ) had similar effects but also quenched PSG formation under starvation, whereas disruption of NatA (*NAA10 $\Delta$* , *NAA15 $\Delta$*  and *NAA50 $\Delta$* ) had no effects (van Deventer et al., 2014). The involved NatB or NatC substrates have not been identified. N-terminal MX- to MP- (X2P) mutation, resulting in an N-terminus that cannot be N-acetylated of the putative candidates  $\alpha 5$  (Pup2),  $\alpha 6$  (Pre5), Rpn9, Fub1, Avo2, Hul5 or Nup100 failed to phenotypically mimic cells lacking NatB or NatC.

Interestingly, proteasomes from rat (Tokunaga et al., 1990) and humans have been found to be acetylated as well. Purification of human 26S proteasome from HEK293 cells and LC-MS/MS identified eight subunits, Rpt3, Rpt5, Rpn1, Rpn2, Gankyrin,  $\alpha 5$ ,  $\alpha 6$ , and  $\beta 4$ , that are acetylated at the first methionine residue, whereas seven subunits, Rpt4, Rpt6, Rpn6, Rpn13/ADRM1,  $\alpha 4$ ,  $\alpha 7$ , and  $\beta 3$  are acetylated at the second amino acid after the removal of the first methionine residue (Wang et al., 2007). It would be interesting to see whether NTA of the identified proteins has any influence on enzymatic activity or assembly of the proteasome in these organisms. Recently, experiments linked Naa10 function to the 28S proteasome in human cells. In the 28S proteasome, the 19S regulatory subcomplex is replaced by a 11S cap (proteasome activator 28; consisting of a heteroheptamer of PA28 $\alpha$  and PA28 $\beta$ ) that stimulates protein degradation in an ATP-independent manner without recognizing ubiquitin (Bhattacharyya et al., 2014). Knockdown or overexpression of Naa10 in RKO and H1299 cells increased or reduced chymotrypsin-like proteasome activity, respectively, without affecting expression level of PA proteins, indicating that Naa10 is a negative regulator of 28S proteasome activity in cells (Min et al., 2013). Experiments in a cell free system revealed that Naa10 reverts activating effects of PA28 on proteasome activity of 20S proteasome core but had no effect on chymotrypsin-like activity of 20S core in the absence of PA28 $\beta$  or 26S proteasome (Min et al., 2013).

### 3.2.4 NatA in prion propagation

Several studies have linked NatA to the Sup35/[PSI<sup>+</sup>] prion in *S. cerevisiae*. Prions are protein-based units of inheritance that, by altering their conformational state and self-assembly into amyloid fibers, serve as novel, self-replicating agents to determine phenotypic traits (Sweeny and Shorter, 2008). The eukaryotic release factor 3, eRF3/Sup35 facilitates, in its soluble nonprion [*psi*<sup>-</sup>] state, translation termination. In the [PSI<sup>+</sup>] prion state, in the alternative conformation that includes Sup35 aggregation, this leads to a termination defect (to stop codon read-through) (Liebman and Chernoff, 2012). The N-terminal PrD (prion-determining domain) is required for formation and propagation of the prion state.

Interestingly, disruption of *NAA10* or *NAA15* in [PSI<sup>+</sup>] yeast strains reversed the [PSI<sup>+</sup>] phenotype measured by stop-codon readthrough assays (colony growth assays based on expression of the *ade1-14* (UGA) allele containing a premature stop codon that leads to adenine auxotrophy in [*psi*<sup>-</sup>] but not in [PSI<sup>+</sup>] cells and stop codon read-through in P<sub>gk1</sub>-stop-β-galactosidase reporter) (Pezza et al., 2009). Furthermore, Sup35 aggregates from ΔNatA [PSI<sup>+</sup>] strain exhibit reduced thermodynamic stability, and are composed of smaller core polymers compared to wild type [PSI<sup>+</sup>] but did not appear to alter the number of Sup35 aggregates or the solubility of Sup35 (Pezza et al., 2009). However, later studies by the same group showed that the decrease in Sup35 aggregate size observed in a [PSI<sup>+</sup>]<sup>strong</sup> ΔNatA strain leads to increased ribosome binding of the aggregates and a decreased stop-codon readthrough, indicating an increase in aggregate-associated termination activity (Pezza et al., 2014). Taken together, these data suggest that NatA function is required for [PSI<sup>+</sup>] strains to display the prion phenotype. Interestingly, Sup35 was identified as a substrate of NatA in a global qualitative and quantitative analysis of protein N-acetylation (Arnesen et al., 2009b). Mutation of the penultimate amino acid to proline abrogates NTA of Sup35; indeed, S2P mutation in [PSI<sup>+</sup>] induced reduced stability and core size of Sup35-S2P aggregates; however, the effects were weaker compared to deletion of NatA, and the Sup35-S2P did not revert stop-codon readthrough, indicating that Sup35 NTA alone is not sufficient and additional factors contribute to the phenotype conversion of the ΔNatA [PSI<sup>+</sup>] strain (Holmes et al., 2014).

The propagation of the [PSI<sup>+</sup>] state involves the action of many chaperones. The Hsp104 chaperone and the Hsp70 chaperone Ssa1/2 (constitutively expressed) and Ssa3/4 (stress inducible), promote fragmentation of prion fibers into smaller seeds, initiating new rounds of prion propagation (Liebman and Chernoff, 2012). The Hsp40 protein Sis1 is an important co-chaperone of HSP70 in prion propagation (Higurashi et al., 2008; Tipton et al., 2008). In contrast to this, the Hsp70 chaperone Ssb1/2 seems to destabilize the prion state [PSI<sup>+</sup>] (Liebman and Chernoff, 2012). In an early study on acetylated proteins in yeast, Ssa1/2 and Ssb1/2 proteins but not Hsp104 have been shown to undergo NTA by NatA (Polevoda et al., 1999). Notably, Ssb was also found to be acetylated by ssNaa10 in *S. solfataricus*, despite the fact that the N-terminal sequence (MEEK...) of Ssb points towards NatB as the corresponding NAT (Mackay et al., 2007; Polevoda et al., 2009). This again indicates that the sequence specificity of the NAT has co-evolved with its substrates sequence. However, the sequence of Ssa3/4 (starting MS...) also indicates that these proteins are targets of NatA in yeast, which has been confirmed biochemically (Van Damme et al., 2014). Interestingly, loss of NatA strongly increased heat-shock response (HSR) as measured

Date: 2015-01-28

by Hsf1 reporter gene expression, increased Hsp104, Ssa1/2, Ssb1/2 and Sis1 protein levels and induced a change in the recruitment of the chaperones Ssb1/2 Ssa1/2 to Sup35 as seen in immunoprecipitation experiments in [*PSI*<sup>+</sup>] cells (Holmes et al., 2014), but did not affect Hsp104 or Ssa1/2 expression levels in [*psi*<sup>-</sup>] cells (Pezza et al., 2009). Additionally, elevation of HSR activity by using a constitutively active Hsf1 mutant (Hsf1ON), reduces Sup35 aggregate size in [*PSI*<sup>+</sup>] cells (mimics the effects of NatA disruption), whereas downregulation of HSR by expressing a dominant-negative mutant of Hsf1 (Hsf1DN) resulted in the loss of the smallest Sup35 core polymers (Holmes et al., 2014). Because disruption of NatA in [*PSI*<sup>+</sup>] strain led to the accumulation of protein aggregates, as assayed by a centrifugation assay, sensitivity to translational inhibitors and Hsf1-mediated gene expression, the authors conclude that loss of NTA promotes general protein misfolding, a redeployment of chaperones to these substrates, and a corresponding stress response that subsequently reduces the size of prion aggregates and reverse their phenotypic consequences (Holmes et al., 2014). However, single mutation of Ssa1, Ssa2, Ssb1, Ssb2 or Sup35 only partially mimicked the effects of  $\Delta$ NatA (Pezza et al., 2009; Holmes et al., 2014), whereas mutation of all of these proteins [*ssa1(S2P)* $\Delta$ *ssa2*, *ssb1(S2P)* $\Delta$ *ssb2*, *sup35(S2P)*] did mimic the effects of disruption of NatA in [*PSI*<sup>+</sup>] strain, including induction of smaller sized Sup35 aggregates and reversion of stop-codon readthrough in colony growth *ade1-14* (UGA) assays (Holmes et al., 2014). This indicates that the increased chaperones and loss of Sup35 NTA combinatorially contribute to the effect of NatA disruption on prion propagation (Holmes et al., 2014).

### 3.3 NATs in prokaryotes (archaeobacteria, eubacteria)

#### 3.3.1 In *E. coli*: RIMs

In contrast to eukaryotes, in *Escherichia coli* and *Salmonella typhimurium*, only a few proteins seem to be N<sup>α</sup>-terminally acetylated (Bernal-Perez et al., 2012; Ansong et al., 2013) and ectopically expressed human proteins in *E. coli* usually lack N<sup>α</sup>-acetylation as shown for human  $\beta\beta$  alcohol dehydrogenase (Höög et al., 1987), rat chaperonin 10 (Ball et al., 1994), Annexin II tetramer (Kang et al., 1997) or Spartin and Tropomyosin (Johnson et al., 2010). However, some proteins are found to be fully or partially acetylated when expressed in *E. coli*, including stathmin-like subdomains (Charbaut et al., 2002) prothymosin  $\alpha$  (Wu et al., 2006) interferon- $\gamma$  (Honda et al., 1989), interferon- $\alpha$  (Takao et al., 1987) or the serine proteinase inhibitor eglin c (Grütter et al., 1985). However, a recent analysis of 112 million mass spectrometric data from 57 bacterial species revealed that NTA might be markedly more common than accepted, as about 16% of bacterial N-termini were found to be N-acetylated (Bonissone et al., 2013).

To date only three N<sup>α</sup>-acetyltransferases have been identified in prokaryotes which specifically modifies only one protein each, as opposed to eukaryotes, in which these enzymes are much less specific (Nesterchuk et al., 2011). These enzymes, RimI, RimJ and RimL (ribosomal modification) specifically acetylate the ribosomal proteins S18 (Isono and Isono, 1980; Yoshikawa et al., 1987), S5 (Cumberlidge and Isono, 1979; Yoshikawa et al., 1987) and L7/L12 (Isono and Isono, 1981; Tanaka et al., 1989), respectively. According to their low sequence identity with the NATs it is most likely that the RIM proteins do not have



Date: 2015-01-28

a common ancestor and evolved independently (Polevoda and Sherman, 2003a; Vetting et al., 2008).

Mutation of each of these Rims leads to temperature sensitivity in the *E. coli* strain K12 (Isono and Isono, 1978), however, this phenotype is independent of the acetylation of S18, S5 and S12 (Cumberlidge and Isono, 1979; Isono and Isono, 1980; Isono and Isono, 1981; Yoshikawa et al., 1987). Nevertheless, there is evidence, that the RimI and RimJ-mediated acetylation occurs post translationally and is required for the assembly of the ribosomal subunits or translation initiation (or more generally for ribosome function) (Poot et al., 1997; Recht and Williamson, 2001; Roy-Chaudhuri et al., 2008).

RimJ has evolved dual functionality; it functions in ribosomal-protein acetylation and as a ribosome assembly factor, where the enzymatic activity is not needed in *E. coli* (Roy-Chaudhuri et al., 2008). Furthermore it has been shown to regulate Pyelonephritis-associated pilus (Pap) transcription in response to multiple environmental cues (White-Ziegler et al., 2002).

RimL seems to have a regulatory function during the growth cycle. A shift in acetylation occurs during the growth cycle: L7 is the acetylated form of L12 (Terhorst et al., 1973). L12/L7 is not acetylated during early log phase but becomes acetylated at the stationary phase (Ramagopal and Subramanian, 1974). Later mass spectrometric data from intact ribosomes showed that NTA of L12 during the stationary phase correlates with an increased ribosomal stability mediates the adaption of the cells to nutrient deprivation (Gordiyenko et al., 2008).

Taken together, it seem like the main function of NTA is regulation/initiation of translation/transcription. If acetylation can also act as a signal for protein degradation as has recently been proposed for eukaryotic NTA (Hwang et al., 2010) has to be shown. However, that was questioned as the enzyme that recognizes acetylated N-termini in eukaryotes and tags them for destruction (Doa10 ubiquitin ligase) does not have orthologues in prokaryotes such as *E. coli* (Jones and O'Connor, 2011).

### 3.3.2 In Archaea

In contrast to bacteria, NTA is quite common in archaea. Large-scale proteomics studies in *Halobacterium salinarum*, *Natronomonas pharaonis* (Falb et al., 2006) and *Haloferax volcanii* (Kirkland et al., 2008) showed that up to 14%, 19% and 29% of the identified proteins are acetylated, respectively. In the former study, acetylation was limited to cleaved N-termini starting with serine or alanine residues, suggesting NatA activity (Falb et al., 2006; Aivaliotis et al., 2007), whereas the latter study also found NatB like substrates (Kirkland et al., 2008). However, many of the encountered proteins were only acetylated partially.

So far, only one NAT in *Sulfolobus solfataricus* has been studied in more detail. However, homologous proteins have also been identified in the archaea *Pyrobaculum aerophilum*, *Natronomonas pharaonis* and *Halobacterium salinarum* (Mackay et al., 2007), *Aeropyrum pernix* (Polevoda and Sherman, 2003b) as well as *Thermoplasma acidophilum* (Han et al., 2006) and *Thermoplasma volcanium* (Ma et al., 2014). The *S. solfataricus* ssNaa10 represents an ancestral variant of the eukaryotic NATs and it adopts a more relaxed substrate specificity as it acetylates NatA, B, C and E substrates (Mackay et al., 2007). In line

Date: 2015-01-28

with that, *in vitro* acetylation assay showed that although ssNaa10 has higher sequence similarity to hNaa10 over hNaa50 (34% vs. 24% sequence identity, respectively) and therefore has a preference for Ser- over Met-amino-terminal substrates, it still is able to accommodate NatA and NatE substrates (Liszcak and Marmorstein, 2013). Furthermore, studies on the X-ray crystal structure of ssNaa10 combined with mutagenesis and kinetic analyses showed that the active site of ssNaa10 represents a hybrid of the NatA and NatE active sites (Liszcak and Marmorstein, 2013), explaining the above findings. The X-ray crystal structure of archaeal *T. volcanium* Naa10 has also been reported, revealing multiple distinct modes of acetyl-Co binding involving the loops between  $\beta 4$  and  $\alpha 3$  including the P-loop (Ma et al., 2014). It should be noted that the acetylation activity of ssNaa10 has been confirmed *in vitro* for a variety of substrates including the *S. solfataricus* proteins Holliday junction resolving enzymes (Hjc and Hje), single-stranded DNA-binding protein (SSB) as well as Alba1 (Mackay et al., 2007; Ma et al., 2014).

Until now, no auxiliary subunit of any of the NATs has been described in archaea, and the function of NTA in archaea is unknown.

### 3.4 NATs in plants

In 2003, Plevoda and Sherman identified the first candidates for NATs (Naa10, Naa20 and Naa30) in *A. thaliana* by homology search with the amino acid sequences of yeast NATs (Plevoda and Sherman, 2003b). More recent studies identified orthologs and their gene duplicates for 6 catalytic subunits and 5 auxiliary subunits corresponding to NatA-F from humans in *Populus nigra* (Liu et al., 2013) and *Populus trichocarpa*, *Chlamydomonas reinhardtii*, *Medicago truncatula*, and *Vitis vinifera* (Bienvenut et al., 2012), implying that all known NATs are conserved in woody plants. Additionally, six distinct methionine aminopeptidases have been identified and characterized in *A. thaliana* (Gigliante et al., 2000).

To date, 200/1054 proteins in *A. thaliana* (Baerenfaller et al., 2008; Bienvenut et al., 2012) and 58 proteins in *Populus nigra* (Liu et al., 2013) proteins have been found to be N-terminally acetylated. A large-scale N-terminomic study in the model diatom *Thalassiosira pseudonana* (phytoplankton) revealed that about 70% of cytosolic proteins were completely or partially acetylated (Huesgen et al., 2013). Furthermore, similar acetylation patterns between animal and plant kingdoms have been observed, suggesting a strong convergence of the characterized modification (Liu et al., 2013). Also, the observed patterns for methionine removal follow the same rules as those of other eukaryotes (Huesgen et al., 2013).

In addition to cytosolic proteins, posttranslational acetylation of proteins imported into organelles has been observed. A large scale analysis of chloroplast preparations from *Arabidopsis thaliana* identified 47 N-terminal acetylated nuclear encoded proteins (Zybailov et al., 2008) and proteomic studies detected NTA on 30% of nuclear encoded stromal chloroplast proteins in the green algae *Chlamydomonas reinhardtii* (Bienvenut et al., 2011) and on 50 % of nuclear encoded plastid proteins in *Thalassiosira pseudonana* (Huesgen et al., 2013). Similarly, a comparative large scale characterization of plant and mammalian proteomes found that 25 % of the identified acetylated *Arabidopsis thaliana* proteins become N<sup>α</sup>-acetylated at a position downstream of the annotated position 1 or 2 (compared to 8 % in humans) and the majority of these proteins (>80 %) reside in the chloroplasts and become

acetylated at the new N-terminus after removal of the chloroplast transit peptide (Bienvenut et al., 2012). Furthermore, the authors indicate that the sequence of the acetylated chloroplast appears to match to NatA substrates, suggesting a dedicated NatA might exist in this organelle (Bienvenut et al., 2012). Interestingly, in *Thalassiosira pseudonana*, a nuclear encoded plastid-targeted putative N-acetyltransferase was identified that could be responsible for the observed NTA of imported and plastid-encoded proteins (Huesgen et al., 2013).

All these data indicate that NTA is very common in plants. Also, it appears that most NAT components have been identified in the analyzed species so far, and the fact that the same rules for N-terminal processing apply, indicates that N-terminal processing is very well conserved in plants. Plants also possess chloroplasts and many studies support post-translational NTA in these plastids. It would be very interesting to identify and characterize the dedicated acetyltransferase in these plastids to understand the evolution of the NATs. On a side note, recently two mitochondrial proteins have been identified to be (partially) acetylated in a NatA-dependent manner, and it has speculated that this NTA is accomplished either post-translationally in mitochondria upon import of Naa10 or alternatively post-translationally upon mitochondrial export of the substrates (Van Damme et al., 2014).

### 3.5 Function of NTA in plants

Compared to mammals or yeast, the function of NTA in plant is even less studied or understood. However, some data point out that NTA in plants may have similar effects as described earlier. Analysis of the acetylation status of stromal proteins and in combination with pulse-chase experiments e.g. revealed that among all identified N-terminally acetylated stromal proteins with a short half-life the NTA was underrepresented indicating that NTA may have a stabilizing role in the plastids of plants (Bienvenut et al., 2011) in contrast to the proposed destabilizing Ac/N-end rule pathway in the mammalian cytosol (Varshavsky, 2011). The authors speculate that, because a) the majority of the plastid proteins have an unusual N-terminus due to the cleavage of their transit peptides and b) the chloroplast does not have a proteasome which is indispensable for the <sup>Ac</sup>N-degron degradation process, but contains a number of bacterial-type chambered proteases, including ClpP (which appears to display specificity for such unusual N-termini), an  $\alpha$ -acetylated N-terminus could protect stromal proteins from rapid degradation (Bienvenut et al., 2011). However, further studies have to analyze the effect of NTA on the stability of plastid and cytosolic plant proteins.

Interestingly, the  $\epsilon$ -subunit of chloroplast ATP synthase has been found to be partially acetylated in *Citrullus lanatus* L. (wild watermelon) and during drought, the non-acetylated form gets degraded by metalloaminopeptidases (Hoshiyasu et al., 2013) indicating that the effect of NTA on stability might be more complex and might even depend on the respective substrate. It should be mentioned that NTA might be generally important for photosynthesis. An *Arabidopsis thaliana* Naa30 (*AtMak3*) mutant exhibit a decreased effective quantum yield of photosystem II and a growth defect (Pesaresi et al., 2003). However, in the latter case, it is not clear how a cytoplasmatic N-acetylation defect would influence chloroplast function. The authors speculate that NTA may be relevant for “stability and/or import of organellar precursor proteins and thus, indirectly, for organellar function” (Pesaresi et al., 2003). This could indicate that, as discussed for yeast, targeting of proteins is regulated by NTA. In this context it is interesting to mention that components of the photosystem II also have been

Date: 2015-01-28

found to be acetylated in *Spinacia oleracea* (spinach) (Michel et al., 1988). Thus, direct acetylation of photosystem compounds by an organelle-localized NAT could also influence photosystem function.

As for mammalian NATs, NTA has also been implicated in plant development. A loss of function mutation of Naa20 (NatB catalytic subunit, nbc-1) or Naa25 (NatB auxiliary subunit, transcurvata2, tcu2) in *Arabidopsis thaliana* caused a strong phenotype that includes leaf reticulation, early flowering, unfertilized or aborted ovules in siliques, indicating that the NatB auxiliary subunit is important for vegetative and reproductive development (Ferrández-Ayela et al., 2013). Furthermore, genetic interaction of *NAA25* and *AGO10* (Argonaute10) suggest a link between NatB-mediated N<sup>α</sup>-terminal acetylation and the microRNA pathway (Ferrández-Ayela et al., 2013). The mechanism for this genetic interaction is not clear and future studies have to explore whether other NATs are also involved in plant development. Interestingly, systematic investigation of publicly available microarray data showed that the expression levels of NatA-F are relatively low during development; these NATs are expressed at low levels but share distinct tissue-specific expression patterns (Zhu et al., 2014).

## 4 CONCLUSION

---

NTA is one of the most abundant protein modifications known, and the NAT machinery is conserved throughout all Eukarya. Over the past 50 years, the function of NTA has begun to be slowly elucidated, and this includes the modulation of protein-protein interaction, protein-stability, protein function, and as well as protein targeting to specific cellular compartments. Many of these functions have been studied in the context of Naa10/NatA; however, we are only starting to really understand the full complexity of this picture. Roughly, about 40 % of all human proteins are substrates of Naa10 and the impact of this modification has only been studied for a few of them. Besides acting as a NAT in the NatA complex, recently other functions have been linked to Naa10, including post-translational NTA, lysine acetylation and NAT/KAT-independent functions. Also, recent publications have linked mutations in Naa10 to various diseases, emphasizing the importance of Naa10 research in humans. The recent design and synthesis of the first 3 bisubstrate inhibitors that potently and selectively inhibit the NatA/Naa10 complex, monomeric Naa10, and hNaa50 further increases the toolset to analyze Naa10 function (Foyen et al., 2013a).

### 4.1 Co-translational NTA and protein quality control

The highly complicated process of protein translation requires the interplay of multiple factors, including non-ribosomal proteins that permanently or transiently associate with the ribosome and welcome the emerging protein as soon as a nascent polypeptide reaches the exit from the ribosomal tunnel. The “welcoming committee” consists of ribosome-associated protein biogenesis factors (RPBs) that co-translationally regulate various processes, including protein folding, targeting protein sorting, protein quality control and protein modifications (Giglion et al., 2014). RPBs include the NATs, MetAPs (methionine aminopeptidases), SRP (signal recognition particle) and chaperones like Hsp70/Hsp40 and NAC (nascent polypeptide-associated complex) (Kramer et al., 2009). The region around the exit tunnel of the proteasome, which is comprised of the ribosomal proteins uL22, uL23, uL24, uL29 as well as eL19, eL31 and eL39 in archaea and eukaryotes, constitutes a general docking platform for RPBs, and recent research indicates that uL23 might play an eminent role as it interacts with almost all RPBs analyzed (Kramer et al., 2009).

It is widely accepted that NATs and NatA, in particular, are linked to the ribosome and co-translationally acetylate nascent chain as they emerge from the ribosomal exit tunnel (Strous et al., 1973; Filner and Marcus, 1974; Strous et al., 1974; Driessen et al., 1985; Yamada and Bradshaw, 1991; Gautschi et al., 2003; Arnesen et al., 2005a; Raue et al., 2007; Polevoda et al., 2008; Arnesen et al., 2009a; Arnesen et al., 2010). Recent findings suggest that NatA negatively regulates protein sorting/targeting to the ER through SRP-dependent and/or SRP-independent mechanisms, and the bias observed in secretory proteins towards not being NTA supports this idea, although some ER-targeted proteins, including Sec61 and Sec62, have been shown to be NTA by NatA (Raue et al., 2007; Forte et al., 2011; Soromani et al., 2012). Interestingly, both, SRP and NatA bind to the ribosome via uL23/uL29 at the tunnel exit; however, SRP seems to reposition to the opposite side of the tunnel during signal peptide recognition to allowing binding of the Sec61 translocon to uL23 (Pool et al., 2002;



Date: 2015-01-28

Halic et al., 2004; Polevoda et al., 2008). In addition to SRP and NatA, NAC has been shown to interact with uL23; however, eL31 seems to be the major ribosomal binding site of NAC (Wegrzyn et al., 2006; Pech et al., 2010; Zhang et al., 2012). This data on the one hand indicates that RPBs compete for nascent chains at the ribosome as suggested for NATs and N-myristoyltransferases (Utsumi et al., 2001) and on the other hand suggests that NATs might functionally regulate adjacent RPBs. We are only beginning to understand the complicated interplay of RPBs on the ribosome, but recent studies suggest that NAC might modulate the function of SRP possibly through the Hsp70/40 chaperone system in an isoform-specific fashion, and this dynamic interplay is important for proper protein targeting and folding (Koplin et al., 2010; del Alamo et al., 2011; Sedwick, 2011; Zhang et al., 2012; Pechmann et al., 2013; Holmes et al., 2014). The role of Naa10/NatA in this context is obscure but the data summarized here strongly implicates a connection of NATs to the protein sorting and protein folding machinery, which could explain, at least in part, the connection of Naa10 and other NATs to neurodegenerative diseases such as Alzheimer's or Parkinson's disease, where misfolding of certain protein species leads to the accumulation of toxic amyloid aggregates (Asaumi et al., 2005; Zabrocki et al., 2008; Pezza et al., 2009; Kang et al., 2012; Kang et al., 2013; Holmes et al., 2014; Pezza et al., 2014). However, it should be noted that the ribosome itself is susceptible to acetylation by NatA and other NATs (Takakura et al., 1992; Arnold et al., 1999; Kamita et al., 2011), and NTA of ribosomal proteins seem to affect various processes, including ribosome biogenesis, ribosomal fidelity/translational activity and translational termination (Kamita et al., 2011; Wan et al., 2013)

## 4.2 Post-translational NTA of Naa10

Besides acting co-translationally, accumulating reports have reported post-translational NTA by Naa10. Indeed, despite being reported to be mainly associated with ribosomes in yeast, a major pool of hNaa10 exists in a ribosome-free context, and a fraction of cytosolic hNaa10 even exists independent of the NatA complex (Arnesen et al., 2005a; Van Damme et al., 2011b). In this context it should be mentioned that NatB has also been shown to not always co-express and co-localize with its catalytic counterpart Naa20 in differentiated neurons in mouse, implying that the auxiliary subunit may function either with an unidentified NAT protein partner(s) or possibly in a NAT-independent manner (Ohyama et al., 2012). However, large-scale N-terminomic analyses are shedding light on post-translational NTA by identifying N-terminally acetylated proteins starting beyond position 1 or 2, such as mitochondrial or chloroplast proteins in plants, that become post-translationally NTA after cleavage of their transit peptide (Zybailov et al., 2008; Helbig et al., 2010; Bienvenut et al., 2011; Helsen et al., 2011; Van Damme et al., 2011b; Bienvenut et al., 2012; Huesgen et al., 2013; Van Damme et al., 2014). Until now, it is not clear if a dedicated NAT enzyme resides in the organelles or if, for example, Naa10 is imported into the respective organelle (Bienvenut et al., 2012; Van Damme et al., 2014). In this regard it is interesting to note that monomeric Naa10 seems to have a different substrate specificity, preferentially acetylating acidic N-termini, e.g. the non-canonical substrates  $\gamma$ - and  $\beta$ -actin (Van Damme et al., 2011b; Van Damme et al., 2014). The reason for this change in substrate specificity are structural rearrangements of the substrate binding pocket in Naa10 induced by Naa15 binding, (Liszczyk et al., 2013). However, the occurrence of classical NatA-substrates in organelles

would suggest that somehow the complete NatA complex is present in organelles, although future studies must address this question in more detail.

### 4.3 NAT-independent functions of Naa10 and transcriptional regulation

Many studies have addressed the intercellular localization of Naa10 in a variety of cell systems, showing that Naa10 mainly localized to the cytoplasm and to a lesser extent in the nucleus, but also isoform specific localization patterns of Naa10 have been suggested (Fluge et al., 2002; Sugiura et al., 2003; Bilton et al., 2005; Arnesen et al., 2006a; Arnesen et al., 2006b; Chun et al., 2007; Xu et al., 2012; Park et al., 2014; Zeng et al., 2014). In agreement with this, a functional nuclear localization signal (KRSHRR) has been identified and characterized (Arnesen et al., 2005a; Park et al., 2012; Park et al., 2014). Interestingly, Naa15 also harbors a putative NLS; however, analysis of the nuclear localization of Naa15 revealed discrepant results (Willis et al., 2002; Arnesen et al., 2005a).

The function for a possible nuclear redistribution of Naa10 is not yet clear, but accumulating studies showed that Naa10 directly or indirectly regulates transcriptional activity in different pathways, including Wnt/ $\beta$ -catenin, MAPK, JAK/STAT5, AP-1, mTOR, NF- $\kappa$ B and BMP signaling (Lim et al., 2006; Kaidi et al., 2007; Lim et al., 2008; Kuo et al., 2009; Kuo et al., 2010; Seo et al., 2010; Park et al., 2012; Xu et al., 2012; Yoon et al., 2014; Zeng et al., 2014). However, the exact mechanism of its action is not known. Despite speculations that Naa10 might directly act as a transcription factor, to our knowledge, a direct interaction of Naa10 and promoter regions has only been described for the E-cadherin promoter (Lee et al., 2010a) and the c-Myc promoter (Lim et al., 2008). The goal of future studies will be to exactly analyze whether Naa10 indeed acts as a transcription factor and/or modulates transcription indirectly through acetylation of substrates or via other NAT-independent functions.

Despite the fact that the NAT-dependent function of Naa10 has been addressed in numerous studies, a possible NAT-independent function of Naa10 is widely understudied and the mechanism of such action is still not clear. The use of an enzymatic-dead hNaa10 mutant helped to differentiate between NAT-dependent and -independent functions. This R82A mutation is located in a R<sup>82</sup>-x-x-G<sup>85</sup>-x-A<sup>87</sup> consensus sequence, critical for the binding of acetyl-CoA, and has been shown to exhibit low acetyltransferase activity and inhibited autoacetylation of Naa10 (Asaumi et al., 2005; Seo et al., 2010; Seo et al., 2014). According to the widely accepted idea that the acetyltransferase activity of Naa10 is crucial for its function, it has been shown that disruption of the catalytic activity abrogated Naa10 function to decrease endocytosis of APP and suppress A $\beta$ 40 secretion, to decrease ubiquitination and increase TSC2 stability thereby repressing mTOR signaling, and for doxorubicin-induced NF- $\kappa$ B activation as well as promotion of cyclin D1 expression through acetylation-dependent activation of  $\beta$ -catenin and AP-1 (Asaumi et al., 2005; Kuo et al., 2010; Seo et al., 2010; Park et al., 2012). However, in some cases, eliminating of NAT activity did not affect Naa10 function. For example, reintroduction of Naa10 R82A restored colony forming in Naa10-depleted cells, although not to the same degree as wild type hNaa10, and overexpression of the mutant increased DNMT activity similarly to wild type Naa10 (Lee et al., 2010a). The

Date: 2015-01-28

authors conclude that Naa10 facilitates DNMT1-mediated gene silencing in an acetyltransferase (AT)-independent manner by recruiting DNMT1 to the E-cadherin promoter, where DNMT1 can silence the transcription of the tumor suppressor E-cadherin through methylation (Lee et al., 2010a). Similarly, Naa10 has been shown to competitively bind to PIX proteins in an AT-independent manner, thereby disrupting the GIT-PIX-Paxillin complex, resulting in reduced activation of the cell migration machinery (Hua et al., 2011). However, the authors did not completely rule out acetylation-dependent mechanisms in regulating cell mobility, as the Naa10-R82A mutant may still have some remaining function to acetylate some other specific proteins that participate in cell mobility control (Hua et al., 2011). A different study showed that Naa10 regulates Janus kinase 2-STAT5a transcriptional activity independent of its acetyltransferase activity (Zeng et al., 2014). Particularly, overexpression of either wild type Naa10 or Naa10-R82A in MCF-7 and MDA-MB-231 breast cancer cells induced a similar decrease in STAT5a binding to ID1 promoter, similar inhibition of ID1 protein levels, and similarly reduced migration of these cells (Zeng et al., 2014). Furthermore, because STAT5a was not found to be acetylated at lysine residue(s) and its protein expression was not affected by the exogenous wild-type or mutant Naa10, the authors speculate that the acetyltransferase activity of Naa10 could be dispensable for inhibiting STAT5a-dependent *ID1* expression and suppressing invasiveness of breast cancer cells (Zeng et al., 2014). It should be noted that although STAT5a itself is a potential substrate for NTA by Naa10 according to its sequence (starting: MAG...), the authors did not check the acetylation status of STAT5a. However, in another study, AT-independent activity Naa10 has been implicated in the activation of the 28S proteasome; however, the mechanism for this action is not clear (Min et al., 2013). The authors speculate that Naa10, through binding to components of the 28S activation complex PA28, could sterically hinder peptide entrance into the proteasome, although this would need further investigation (Min et al., 2013).

## Acknowledgements

The laboratory of G.J.L. is supported by funds from the Stanley Institute for Cognitive Genomics at Cold Spring Harbor Laboratory (CSHL). The authors thank Jason O'Rawe for critical reading of the manuscript.

## Competing Interests

G.J.L serves on the medical advisory board of GenePeeks, Inc. and the scientific advisory board of Omicia, Inc. The study did not involve these companies and did not use products from these companies.

## 5 REFERENCES

- Adam, V., Ekblad, M., Sweeney, K., Müller, H., Busch, K.H., Johnsen, C.T., Kang, N.R., Lemoine, N.R. and Halldén, G., 2012. Synergistic and Selective Cancer Cell Killing Mediated by the Oncolytic Adenoviral Mutant AdΔΔ and Dietary Phytochemicals in Prostate Cancer Models. *Hum Gene Ther* 23, 1003-15.
- Aivaliotis, M., Gevaert, K., Falb, M., Tebbe, A., Konstantinidis, K., Bisle, B., Klein, C., Martens, L., Staes, A., Timmerman, E., Van Damme, J., Siedler, F., Pfeiffer, F., Vandekerckhove, J. and Oesterhelt, D., 2007. Large-scale identification of N-terminal peptides in the halophilic archaea *Halobacterium salinarum* and *Natronomonas pharaonis*. *J Proteome Res* 6, 2195-204.
- Akopian, D., Shen, K., Zhang, X. and Shan, S.O., 2013. Signal recognition particle: an essential protein-targeting machine. *Annu Rev Biochem* 82, 693-721.
- Aksnes, H., Osberg, C. and Arnesen, T., 2013. N-Terminal Acetylation by NatC Is Not a General Determinant for Substrate Subcellular Localization in *Saccharomyces cerevisiae*. *PLoS One* 8, e61012.
- Alderson, T.R. and Markley, J.L., 2013. Biophysical characterization of  $\alpha$ -synuclein and its controversial structure. *Intrinsically Disord Proteins* 1, 18-39.
- Ansong, C., Wu, S., Meng, D., Liu, X., Brewer, H.M., Deatherage Kaiser, B.L., Nakayasu, E.S., Cort, J.R., Pevzner, P., Smith, R.D., Heffron, F., Adkins, J.N. and Pasa-Tolic, L., 2013. Top-down proteomics reveals a unique protein S-thiolation switch in *Salmonella Typhimurium* in response to infection-like conditions. *Proc Natl Acad Sci U S A* 110, 10153-8.
- Aparicio, O.M., Billington, B.L. and Gottschling, D.E., 1991. Modifiers of position effect are shared between telomeric and silent mating-type loci in *S. cerevisiae*. *Cell* 66, 1279-87.
- Aragon, A.D., Rodriguez, A.L., Meirelles, O., Roy, S., Davidson, G.S., Tapia, P.H., Allen, C., Joe, R., Benn, D. and Werner-Washburne, M., 2008. Characterization of differentiated quiescent and nonquiescent cells in yeast stationary-phase cultures. *Mol Biol Cell* 19, 1271-80.
- Arendt, C.S. and Hochstrasser, M., 1999. Eukaryotic 20S proteasome catalytic subunit propeptides prevent active site inactivation by N-terminal acetylation and promote particle assembly. *EMBO J* 18, 3575-85.
- Armache, K.J., Garlick, J.D., Canzio, D., Narlikar, G.J. and Kingston, R.E., 2011. Structural basis of silencing: Sir3 BAH domain in complex with a nucleosome at 3.0 Å resolution. *Science* 334, 977-82.
- Arnaudo, N., Fernández, I.S., McLaughlin, S.H., Peak-Chew, S.Y., Rhodes, D. and Martino, F., 2013. The N-terminal acetylation of Sir3 stabilizes its binding to the nucleosome core particle. *Nat Struct Mol Biol*.
- Arnesen, T., 2011. Towards a functional understanding of protein N-terminal acetylation. *PLoS Biol* 9, e1001074.
- Arnesen, T., Anderson, D., Baldersheim, C., Lanotte, M., Varhaug, J.E. and Lillehaug, J.R., 2005a. Identification and characterization of the human ARD1-NATH protein acetyltransferase complex. *Biochem J* 386, 433-43.
- Arnesen, T., Anderson, D., Torsvik, J., Halseth, H.B., Varhaug, J.E. and Lillehaug, J.R., 2006a. Cloning and characterization of hNAT5/hSAN: an evolutionarily conserved component of the NatA protein N-alpha-acetyltransferase complex. *Gene* 371, 291-5.
- Arnesen, T., Betts, M.J., Pendino, F., Liberles, D.A., Anderson, D., Caro, J., Kong, X., Varhaug, J.E. and Lillehaug, J.R., 2006b. Characterization of hARD2, a processed

Date: 2015-01-28

- hARD1 gene duplicate, encoding a human protein N-alpha-acetyltransferase. *BMC Biochem* 7, 13.
- Arnesen, T., Gromyko, D., Kagabo, D., Betts, M.J., Starheim, K.K., Varhaug, J.E., Anderson, D. and Lillehaug, J.R., 2009a. A novel human NatA Nalpha-terminal acetyltransferase complex: hNaal6p-hNaa10p (hNat2-hArd1). *BMC Biochem* 10, 15.
- Arnesen, T., Gromyko, D., Pendino, F., Rynningen, A., Varhaug, J.E. and Lillehaug, J.R., 2006c. Induction of apoptosis in human cells by RNAi-mediated knockdown of hARD1 and NATH, components of the protein N-alpha-acetyltransferase complex. *Oncogene* 25, 4350-60.
- Arnesen, T., Kong, X., Evjenth, R., Gromyko, D., Varhaug, J.E., Lin, Z., Sang, N., Caro, J. and Lillehaug, J.R., 2005b. Interaction between HIF-1 alpha (ODD) and hARD1 does not induce acetylation and destabilization of HIF-1 alpha. *FEBS Lett* 579, 6428-32.
- Arnesen, T., Starheim, K.K., Van Damme, P., Evjenth, R., Dinh, H., Betts, M.J., Rynningen, A., Vandekerckhove, J., Gevaert, K. and Anderson, D., 2010. The chaperone-like protein HYPK acts together with NatA in cotranslational N-terminal acetylation and prevention of Huntingtin aggregation. *Mol Cell Biol* 30, 1898-909.
- Arnesen, T., Van Damme, P., Polevoda, B., Helsens, K., Evjenth, R., Colaert, N., Varhaug, J.E., Vandekerckhove, J., Lillehaug, J.R., Sherman, F. and Gevaert, K., 2009b. Proteomics analyses reveal the evolutionary conservation and divergence of N-terminal acetyltransferases from yeast and humans. *Proc Natl Acad Sci U S A* 106, 8157-62.
- Arnold, R.J., Polevoda, B., Reilly, J.P. and Sherman, F., 1999. The action of N-terminal acetyltransferases on yeast ribosomal proteins. *J Biol Chem* 274, 37035-40.
- Asaumi, M., Iijima, K., Sumioka, A., Iijima-Ando, K., Kirino, Y., Nakaya, T. and Suzuki, T., 2005. Interaction of N-terminal acetyltransferase with the cytoplasmic domain of beta-amyloid precursor protein and its effect on A beta secretion. *J Biochem* 137, 147-55.
- Ashiuchi, M., Yagami, T., Willey, R.J., Padovan, J.C., Chait, B.T., Popowicz, A., Manning, L.R. and Manning, J.M., 2005. N-terminal acetylation and protonation of individual hemoglobin subunits: position-dependent effects on tetramer strength and cooperativity. *Protein Sci* 14, 1458-71.
- Bachmair, A., Finley, D. and Varshavsky, A., 1986. In vivo half-life of a protein is a function of its amino-terminal residue. *Science* 234, 179-86.
- Baerenfaller, K., Grossmann, J., Grobei, M.A., Hull, R., Hirsch-Hoffmann, M., Yalovsky, S., Zimmermann, P., Grossniklaus, U., Gruissem, W. and Baginsky, S., 2008. Genome-scale proteomics reveals *Arabidopsis thaliana* gene models and proteome dynamics. *Science* 320, 938-41.
- Ball, H.L., Giuliani, P., Lucietto, P., Fossati, G. and Mascagni, P., 1994. Chemical synthesis and characterisation of rat chaperonin 10: effect of chain length, ions, heat and N-terminal acetylation on unchaperoned folding into its heptameric form. *Biomed Pept Proteins Nucleic Acids* 1, 39-44.
- Bartels, T., Kim, N.C., Luth, E.S. and Selkoe, D.J., 2014. N-alpha-acetylation of  $\alpha$ -synuclein increases its helical folding propensity, GM1 binding specificity and resistance to aggregation. *PLoS One* 9, e103727.
- Behnia, R., Panic, B., Whyte, J.R. and Munro, S., 2004. Targeting of the Arf-like GTPase Arl3p to the Golgi requires N-terminal acetylation and the membrane protein Sys1p. *Nat Cell Biol* 6, 405-13.
- Bell, S.P., Mitchell, J., Leber, J., Kobayashi, R. and Stillman, B., 1995. The multidomain structure of Orc1p reveals similarity to regulators of DNA replication and transcriptional silencing. *Cell* 83, 563-8.
- Ben-Saadon, R., Fajerman, I., Ziv, T., Hellman, U., Schwartz, A.L. and Ciechanover, A., 2004. The tumor suppressor protein p16(INK4a) and the human papillomavirus



Date: 2015-01-28

- oncoprotein-58 E7 are naturally occurring lysine-less proteins that are degraded by the ubiquitin system. Direct evidence for ubiquitination at the N-terminal residue. *J Biol Chem* 279, 41414-21.
- Benizri, E., Ginouvès, A. and Berra, E., 2008. The magic of the hypoxia-signaling cascade. *Cell Mol Life Sci* 65, 1133-49.
- Bernal-Perez, L.F., Prokai, L. and Ryu, Y., 2012. Selective N-terminal fluorescent labeling of proteins using 4-chloro-7-nitrobenzofurazan: a method to distinguish protein N-terminal acetylation. *Anal Biochem* 428, 13-5.
- Bhattacharyya, S., Yu, H., Mim, C. and Matouschek, A., 2014. Regulated protein turnover: snapshots of the proteasome in action. *Nat Rev Mol Cell Biol* 15, 122-33.
- Bienvenut, W.V., Espagne, C., Martinez, A., Majeran, W., Valot, B., Zivy, M., Vallon, O., Adam, Z., Meinel, T. and Giglione, C., 2011. Dynamics of post-translational modifications and protein stability in the stroma of *Chlamydomonas reinhardtii* chloroplasts. *Proteomics* 11, 1734-50.
- Bienvenut, W.V., Sumpton, D., Martinez, A., Lilla, S., Espagne, C., Meinel, T. and Giglione, C., 2012. Comparative large scale characterization of plant versus mammal proteins reveals similar and idiosyncratic N- $\alpha$ -acetylation features. *Mol Cell Proteomics* 11, M111.015131.
- Bilton, R., Mazure, N., Trottier, E., Hattab, M., Déry, M.A., Richard, D.E., Pouyssegur, J. and Brahimi-Horn, M.C., 2005. Arrest-defective-1 protein, an acetyltransferase, does not alter stability of hypoxia-inducible factor (HIF)-1 $\alpha$  and is not induced by hypoxia or HIF. *J Biol Chem* 280, 31132-40.
- Bonissone, S., Gupta, N., Romine, M., Bradshaw, R.A. and Pevzner, P.A., 2013. N-terminal protein processing: a comparative proteogenomic analysis. *Mol Cell Proteomics* 12, 14-28.
- Brahimi-Horn, M.C., Chiche, J. and Pouyssegur, J., 2007. Hypoxia signalling controls metabolic demand. *Curr Opin Cell Biol* 19, 223-9.
- Caesar, R. and Blomberg, A., 2004. The stress-induced Tfs1p requires NatB-mediated acetylation to inhibit carboxypeptidase Y and to regulate the protein kinase A pathway. *J Biol Chem* 279, 38532-43.
- Caesar, R., Warringer, J. and Blomberg, A., 2006. Physiological importance and identification of novel targets for the N-terminal acetyltransferase NatB. *Eukaryot Cell* 5, 368-78.
- Cargnello, M. and Roux, P.P., 2011. Activation and function of the MAPKs and their substrates, the MAPK-activated protein kinases. *Microbiol Mol Biol Rev* 75, 50-83.
- Chakrabarty, A., Doig, A.J. and Baldwin, R.L., 1993. Helix capping propensities in peptides parallel those in proteins. *Proc Natl Acad Sci U S A* 90, 11332-6.
- Chang, C.C., Lin, M.T., Lin, B.R., Jeng, Y.M., Chen, S.T., Chu, C.Y., Chen, R.J., Chang, K.J., Yang, P.C. and Kuo, M.L., 2006. Effect of connective tissue growth factor on hypoxia-inducible factor 1 $\alpha$  degradation and tumor angiogenesis. *J Natl Cancer Inst* 98, 984-95.
- Chang, H.H., Falick, A.M., Carlton, P.M., Sedat, J.W., DeRisi, J.L. and Marletta, M.A., 2008. N-terminal processing of proteins exported by malaria parasites. *Mol Biochem Parasitol* 160, 107-15.
- Charbaut, E., Redeker, V., Rossier, J. and Sobel, A., 2002. N-terminal acetylation of ectopic recombinant proteins in *Escherichia coli*. *FEBS Lett* 529, 341-5.
- Chen, D., Zhang, J., Minnerly, J., Kaul, T., Riddle, D.L. and Jia, K., 2014. daf-31 Encodes the Catalytic Subunit of N Alpha-Acetyltransferase that Regulates *Caenorhabditis elegans* Development, Metabolism and Adult Lifespan. *PLoS Genet* 10, e1004699.
- Chen, X., Chi, Y., Bloecher, A., Aebersold, R., Clurman, B.E. and Roberts, J.M., 2004. N-acetylation and ubiquitin-independent proteasomal degradation of p21(Cip1). *Mol Cell* 16, 839-47.

Date: 2015-01-28

- Chu, C.W., Hou, F., Zhang, J., Phu, L., Loktev, A.V., Kirkpatrick, D.S., Jackson, P.K., Zhao, Y. and Zou, H., 2011. A novel acetylation of  $\beta$ -tubulin by San modulates microtubule polymerization via down-regulating tubulin incorporation. *Mol Biol Cell* 22, 448-56.
- Chun, K.H., Cho, S.J., Choi, J.S., Kim, S.H., Kim, K.W. and Lee, S.K., 2007. Differential regulation of splicing, localization and stability of mammalian ARD1235 and ARD1225 isoforms. *Biochem Biophys Res Commun* 353, 18-25.
- Chun, Y.S., Lee, K.H., Choi, E., Bae, S.Y., Yeo, E.J., Huang, L.E., Kim, M.S. and Park, J.W., 2003. Phorbol ester stimulates the nonhypoxic induction of a novel hypoxia-inducible factor 1alpha isoform: implications for tumor promotion. *Cancer Res* 63, 8700-7.
- Ciechanover, A. and Ben-Saadon, R., 2004. N-terminal ubiquitination: more protein substrates join in. *Trends Cell Biol* 14, 103-6.
- Clevers, H. and Nusse, R., 2012. Wnt/ $\beta$ -catenin signaling and disease. *Cell* 149, 1192-205.
- Coulton, A.T., East, D.A., Galinska-Rakoczy, A., Lehman, W. and Mulvihill, D.P., 2010. The recruitment of acetylated and unacetylated tropomyosin to distinct actin polymers permits the discrete regulation of specific myosins in fission yeast. *J Cell Sci* 123, 3235-43.
- Cumberlidge, A.G. and Isono, K., 1979. Ribosomal protein modification in *Escherichia coli*. I. A mutant lacking the N-terminal acetylation of protein S5 exhibits thermosensitivity. *J Mol Biol* 131, 169-89.
- de Haan, E.C., Wauben, M.H., Wagenaar-Hilbers, J.P., Grosfeld-Stulemeyer, M.C., Rijkers, D.T., Moret, E.E. and Liskamp, R.M., 2004. Stabilization of peptide guinea pig myelin basic protein 72-85 by N-terminal acetylation-implications for immunological studies. *Mol Immunol* 40, 943-8.
- Deakin, J.F., Doströvsy, J.O. and Smyth, D.G., 1980. Influence of N-terminal acetylation and C-terminal proteolysis on the analgesic activity of beta-endorphin. *Biochem J* 189, 501-6.
- del Alamo, M., Hogan, D.J., Pechmann, S., Albanese, V., Brown, P.O. and Frydman, J., 2011. Defining the specificity of cotranslationally acting chaperones by systematic analysis of mRNAs associated with ribosome-nascent chain complexes. *PLoS Biol* 9, e1001100.
- Demidenko, Z.N., Rapisarda, A., Garayoa, M., Giannakakou, P., Melillo, G. and Blagosklonny, M.V., 2005. Accumulation of hypoxia-inducible factor-1alpha is limited by transcription-dependent depletion. *Oncogene* 24, 4829-38.
- Doig, A.J., Chakrabarty, A., Klingler, T.M. and Baldwin, R.L., 1994. Determination of free energies of N-capping in alpha-helices by modification of the Lifson-Roig helix-coil theory to include N- and C-capping. *Biochemistry* 33, 3396-403.
- Driessen, H.P., de Jong, W.W., Tesser, G.I. and Bloemendal, H., 1985. The mechanism of N-terminal acetylation of proteins. *CRC Crit Rev Biochem* 18, 281-325.
- Esmailpour, T., Riazifar, H., Liu, L., Donkervoort, S., Huang, V.H., Madaan, S., Shoucri, B.M., Busch, A., Wu, J., Towbin, A., Chadwick, R.B., Sequeira, A., Vawter, M.P., Sun, G., Johnston, J.J., Biesecker, L.G., Kawaguchi, R., Sun, H., Kimonis, V. and Huang, T., 2014. A splice donor mutation in NAA10 results in the dysregulation of the retinoic acid signalling pathway and causes Lenz microphthalmia syndrome. *J Med Genet* 51, 185-96.
- Evjenth, R., Hole, K., Karlsen, O.A., Ziegler, M., Arnesen, T. and Lillehaug, J.R., 2009. Human Naa50p (Nat5/San) displays both protein N alpha- and N epsilon-acetyltransferase activity. *J Biol Chem* 284, 31122-9.
- Evjenth, R.H., Brenner, A.K., Thompson, P.R., Arnesen, T., Frøystein, N. and Lillehaug, J.R., 2012. Human protein N-terminal acetyltransferase hNaa50p (hNAT5/hSAN) follows ordered sequential catalytic mechanism: combined kinetic and NMR study. *J Biol Chem* 287, 10081-8.

Date: 2015-01-28

- Fairman, R., Shoemaker, K.R., York, E.J., Stewart, J.M. and Baldwin, R.L., 1989. Further studies of the helix dipole model: effects of a free  $\alpha$ -NH<sub>3</sub><sup>+</sup> or  $\alpha$ -COO<sup>-</sup> group on helix stability. *Proteins* 5, 1-7.
- Falb, M., Aivaliotis, M., Garcia-Rizo, C., Bisle, B., Tebbe, A., Klein, C., Konstantinidis, K., Siedler, F., Pfeiffer, F. and Oesterhelt, D., 2006. Archaeal N-terminal protein maturation commonly involves N-terminal acetylation: a large-scale proteomics survey. *J Mol Biol* 362, 915-24.
- Fath, D.M., Kong, X., Liang, D., Lin, Z., Chou, A., Jiang, Y., Fang, J., Caro, J. and Sang, N., 2006. Histone deacetylase inhibitors repress the transactivation potential of hypoxia-inducible factors independently of direct acetylation of HIF- $\alpha$ . *J Biol Chem* 281, 13612-9.
- Fauvet, B., Fares, M.B., Samuel, F., Dikiy, I., Tandon, A., Eliezer, D. and Lashuel, H.A., 2012. Characterization of Semisynthetic and Naturally N $\alpha$ -Acetylated  $\alpha$ -Synuclein in Vitro and in Intact Cells: IMPLICATIONS FOR AGGREGATION AND CELLULAR PROPERTIES OF  $\alpha$ -SYNUCLEIN. *J Biol Chem* 287, 28243-62.
- Ferrández-Ayela, A., Micol-Ponce, R., Sánchez-García, A.B., Alonso-Peral, M.M., Micol, J.L. and Ponce, M.R., 2013. Mutation of an Arabidopsis NatB N-alpha-terminal acetylation complex component causes pleiotropic developmental defects. *PLoS One* 8, e80697.
- Fielenbach, N. and Antebi, A., 2008. C. elegans dauer formation and the molecular basis of plasticity. *Genes Dev* 22, 2149-65.
- Filner, B. and Marcus, A., 1974. TMV coat protein synthesis in vivo: analysis of the N-terminal acetylation. *Virology* 61, 537-46.
- Fisher, T.S., Etages, S.D., Hayes, L., Crimin, K. and Li, B., 2005. Analysis of ARD1 function in hypoxia response using retroviral RNA interference. *J Biol Chem* 280, 17749-57.
- Fluge, Ø., Bruland, O., Akslen, L.A., Varhaug, J.E. and Lillehaug, J.R., 2002. NATH, a novel gene overexpressed in papillary thyroid carcinomas. *Oncogene* 21, 5056-68.
- Forte, G.M., Pool, M.R. and Stirling, C.J., 2011. N-terminal acetylation inhibits protein targeting to the endoplasmic reticulum. *PLoS Biol* 9, e1001073.
- Fox, C.A., Ehrenhofer-Murray, A.E., Loo, S. and Rine, J., 1997. The origin recognition complex, SIR1, and the S phase requirement for silencing. *Science* 276, 1547-51.
- Foy, H., Jones, J.E., Lewallen, D., Narawane, R., Varhaug, J.E., Thompson, P.R. and Arnesen, T., 2013a. Design, Synthesis, and Kinetic Characterization of Protein N-Terminal Acetyltransferase Inhibitors. *ACS Chem Biol*.
- Foy, H., Van Damme, P., Støve, S.I., Glomnes, N., Evjenth, R., Gevaert, K. and Arnesen, T., 2013b. Protein N-terminal acetyltransferases act as N-terminal propionyltransferases in vitro and in vivo. *Mol Cell Proteomics* 12, 42-54.
- Gartel, A.L., Ye, X., Goufman, E., Shianov, P., Hay, N., Najmabadi, F. and Tyner, A.L., 2001. Myc represses the p21(WAF1/CIP1) promoter and interacts with Sp1/Sp3. *Proc Natl Acad Sci U S A* 98, 4510-5.
- Gautschi, M., Just, S., Mun, A., Ross, S., Rücknagel, P., Dubaquié, Y., Ehrenhofer-Murray, A. and Rospert, S., 2003. The yeast N(alpha)-acetyltransferase NatA is quantitatively anchored to the ribosome and interacts with nascent polypeptides. *Mol Cell Biol* 23, 7403-14.
- Geissenhöner, A., Weise, C. and Ehrenhofer-Murray, A.E., 2004. Dependence of ORC silencing function on NatA-mediated Nalpha acetylation in Saccharomyces cerevisiae. *Mol Cell Biol* 24, 10300-12.
- Gendron, R.L., Adams, L.C. and Paradis, H., 2000. Tubedown-1, a novel acetyltransferase associated with blood vessel development. *Dev Dyn* 218, 300-15.

Date: 2015-01-28

- Gendron, R.L., Good, W.V., Miskiewicz, E., Tucker, S., Phelps, D.L. and Paradis, H., 2006. Tubedown-1 (Tbdn-1) suppression in oxygen-induced retinopathy and in retinopathy of prematurity. *Mol Vis* 12, 108-16.
- Gendron, R.L., Laver, N.V., Good, W.V., Grossniklaus, H.E., Miskiewicz, E., Whelan, M.A., Walker, J. and Paradis, H., 2010. Loss of tubedown expression as a contributing factor in the development of age-related retinopathy. *Invest Ophthalmol Vis Sci* 51, 5267-77.
- Geng, H., Liu, Q., Xue, C., David, L.L., Beer, T.M., Thomas, G.V., Dai, M.S. and Qian, D.Z., 2012. HIF1 $\alpha$  protein stability is increased by acetylation at lysine 709. *J Biol Chem* 287, 35496-505.
- Giglione, C., Fieulaine, S. and Meinel, T., 2014. N-terminal protein modifications: Bringing back into play the ribosome. *Biochimie*.
- Giglione, C., Serero, A., Pierre, M., Boisson, B. and Meinel, T., 2000. Identification of eukaryotic peptide deformylases reveals universality of N-terminal protein processing mechanisms. *EMBO J* 19, 5916-29.
- Goetze, S., Qeli, E., Mosimann, C., Staes, A., Gerrits, B., Roschitzki, B., Mohanty, S., Niederer, E.M., Laczko, E., Timmerman, E., Lange, V., Hafen, E., Aebersold, R., Vandekerckhove, J., Basler, K., Ahrens, C.H., Gevaert, K. and Brunner, E., 2009. Identification and functional characterization of N-terminally acetylated proteins in *Drosophila melanogaster*. *PLoS Biol* 7, e1000236.
- Gordiyenko, Y., Deroo, S., Zhou, M., Videler, H. and Robinson, C.V., 2008. Acetylation of L12 increases interactions in the Escherichia coli ribosomal stalk complex. *J Mol Biol* 380, 404-14.
- Grauffel, C., Abboud, A., Liszczak, G., Marmorstein, R., Arnesen, T. and Reuter, N., 2012. Specificity and versatility of substrate binding sites in four catalytic domains of human N-terminal acetyltransferases. *PLoS One* 7, e52642.
- Greenfield, N.J., Stafford, W.F. and Hitchcock-DeGregori, S.E., 1994. The effect of N-terminal acetylation on the structure of an N-terminal tropomyosin peptide and alpha-tropomyosin. *Protein Sci* 3, 402-10.
- Groll, M., Ditzel, L., Löwe, J., Stock, D., Bochtler, M., Bartunik, H.D. and Huber, R., 1997. Structure of 20S proteasome from yeast at 2.4 Å resolution. *Nature* 386, 463-71.
- Gromyko, D., Arnesen, T., Rynningen, A., Varhaug, J.E. and Lillehaug, J.R., 2010. Depletion of the human N $\alpha$ -terminal acetyltransferase A induces p53-dependent apoptosis and p53-independent growth inhibition. *Int J Cancer* 127, 2777-89.
- Gruschus, J.M., Yap, T.L., Pistolesi, S., Maltsev, A.S. and Lee, J.C., 2013. NMR Structure of Calmodulin Complexed to an N-Terminally Acetylated  $\alpha$ -Synuclein Peptide. *Biochemistry*.
- Grütter, M.G., Märki, W. and Walliser, H.P., 1985. Crystals of the complex between recombinant N-acetylglutamine c and subtilisin. A preliminary characterization. *J Biol Chem* 260, 11436-7.
- Haber, J.E., 2012. Mating-type genes and MAT switching in *Saccharomyces cerevisiae*. *Genetics* 191, 33-64.
- Halic, M., Becker, T., Pool, M.R., Spahn, C.M., Grassucci, R.A., Frank, J. and Beckmann, R., 2004. Structure of the signal recognition particle interacting with the elongation-arrested ribosome. *Nature* 427, 808-14.
- Han, S.H., Ha, J.Y., Kim, K.H., Oh, S.J., Kim, d.J., Kang, J.Y., Yoon, H.J., Kim, S.H., Seo, J.H., Kim, K.W. and Suh, S.W., 2006. Expression, crystallization and preliminary X-ray crystallographic analyses of two N-terminal acetyltransferase-related proteins from *Thermoplasma acidophilum*. *Acta Crystallogr Sect F Struct Biol Cryst Commun* 62, 1127-30.
- Havugimana, P.C., Hart, G.T., Nepusz, T., Yang, H., Turinsky, A.L., Li, Z., Wang, P.I., Boutz, D.R., Fong, V., Phanse, S., Babu, M., Craig, S.A., Hu, P., Wan, C., Vlasblom,



Date: 2015-01-28

- J., Dar, V.U., Bezginov, A., Clark, G.W., Wu, G.C., Wodak, S.J., Tillier, E.R., Paccanaro, A., Marcotte, E.M. and Emili, A., 2012. A census of human soluble protein complexes. *Cell* 150, 1068-81.
- Hayden, M.S. and Ghosh, S., 2012. NF- $\kappa$ B, the first quarter-century: remarkable progress and outstanding questions. *Genes Dev* 26, 203-34.
- Helbig, A.O., Rosati, S., Pijnappel, P.W., van Breukelen, B., Timmers, M.H., Mohammed, S., Slijper, M. and Heck, A.J., 2010. Perturbation of the yeast N-acetyltransferase NatB induces elevation of protein phosphorylation levels. *BMC Genomics* 11, 685.
- Helsens, K., Van Damme, P., Degroove, S., Martens, L., Arnesen, T., Vandekerckhove, J. and Gevaert, K., 2011. Bioinformatics analysis of a *Saccharomyces cerevisiae* N-terminal proteome provides evidence of alternative translation initiation and post-translational N-terminal acetylation. *J Proteome Res* 10, 3578-89.
- Hershko, A., Heller, H., Eytan, E., Kaklij, G. and Rose, I.A., 1984. Role of the alpha-amino group of protein in ubiquitin-mediated protein breakdown. *Proc Natl Acad Sci U S A* 81, 7021-5.
- Higurashi, T., Hines, J.K., Sahi, C., Aron, R. and Craig, E.A., 2008. Specificity of the J-protein Sis1 in the propagation of 3 yeast prions. *Proc Natl Acad Sci U S A* 105, 16596-601.
- Hofmann, I. and Munro, S., 2006. An N-terminally acetylated Arf-like GTPase is localised to lysosomes and affects their motility. *J Cell Sci* 119, 1494-503.
- Holmes, W.M., Mannakee, B.K., Gutenkunst, R.N. and Serio, T.R., 2014. Loss of amino-terminal acetylation suppresses a prion phenotype by modulating global protein folding. *Nat Commun* 5, 4383.
- Honda, S., Asano, T., Kajio, T. and Nishimura, O., 1989. Escherichia coli-derived human interferon-gamma with Cys-Tyr-Cys at the N-terminus is partially N alpha-acetylated. *Arch Biochem Biophys* 269, 612-22.
- Höög, J.O., Weis, M., Zeppezauer, M., Jörnvall, H. and von Bahr-Lindström, H., 1987. Expression in Escherichia coli of active human alcohol dehydrogenase lacking N-terminal acetylation. *Biosci Rep* 7, 969-74.
- Hoshiyasu, S., Kohzuma, K., Yoshida, K., Fujiwara, M., Fukao, Y., Yokota, A. and Akashi, K., 2013. Potential involvement of N-terminal acetylation in the quantitative regulation of the  $\epsilon$  subunit of chloroplast ATP synthase under drought stress. *Biosci Biotechnol Biochem* 77, 998-1007.
- Hou, F., Chu, C.W., Kong, X., Yokomori, K. and Zou, H., 2007. The acetyltransferase activity of San stabilizes the mitotic cohesin at the centromeres in a shugoshin-independent manner. *J Cell Biol* 177, 587-97.
- Hua, K.T., Tan, C.T., Johansson, G., Lee, J.M., Yang, P.W., Lu, H.Y., Chen, C.K., Su, J.L., Chen, P.B., Wu, Y.L., Chi, C.C., Kao, H.J., Shih, H.J., Chen, M.W., Chien, M.H., Chen, P.S., Lee, W.J., Cheng, T.Y., Rosenberger, G., Chai, C.Y., Yang, C.J., Huang, M.S., Lai, T.C., Chou, T.Y., Hsiao, M. and Kuo, M.L., 2011. N- $\alpha$ -acetyltransferase 10 protein suppresses cancer cell metastasis by binding PIX proteins and inhibiting Cdc42/Rac1 activity. *Cancer Cell* 19, 218-31.
- Huesgen, P.F., Alami, M., Lange, P.F., Foster, L.J., Schröder, W.P., Overall, C.M. and Green, B.R., 2013. Proteomic amino-termini profiling reveals targeting information for protein import into complex plastids. *PLoS One* 8, e74483.
- Humbard, M.A., Stevens, S.M. and Maupin-Furlow, J.A., 2006. Posttranslational modification of the 20S proteasomal proteins of the archaeon *Haloferax volcanii*. *J Bacteriol* 188, 7521-30.
- Humbard, M.A., Zhou, G. and Maupin-Furlow, J.A., 2009. The N-terminal penultimate residue of 20S proteasome  $\alpha$ 1 influences its N(alpha) acetylation and protein



Date: 2015-01-28

- levels as well as growth rate and stress responses of *Haloferax volcanii*. *J Bacteriol* 191, 3794-803.
- Huxford, T., Huang, D.B., Malek, S. and Ghosh, G., 1998. The crystal structure of the IkappaBalpha/NF-kappaB complex reveals mechanisms of NF-kappaB inactivation. *Cell* 95, 759-70.
- Hwang, C.S., Shemorry, A. and Varshavsky, A., 2010. N-terminal acetylation of cellular proteins creates specific degradation signals. *Science* 327, 973-7.
- Ingram, A.K., Cross, G.A. and Horn, D., 2000. Genetic manipulation indicates that ARD1 is an essential N(alpha)-acetyltransferase in *Trypanosoma brucei*. *Mol Biochem Parasitol* 111, 309-17.
- Isono, K. and Isono, S., 1980. Ribosomal protein modification in *Escherichia coli*. II. Studies of a mutant lacking the N-terminal acetylation of protein S18. *Mol Gen Genet* 177, 645-51.
- Isono, S. and Isono, K., 1978. Mutations affecting the structural genes and the genes coding for modifying enzymes for ribosomal proteins in *Escherichia coli*. *Mol Gen Genet* 165, 15-20.
- Isono, S. and Isono, K., 1981. Ribosomal protein modification in *Escherichia coli*. III. Studies of mutants lacking an acetylase activity specific for protein L12. *Mol Gen Genet* 183, 473-7.
- Jacobs, M.D. and Harrison, S.C., 1998. Structure of an IkappaBalpha/NF-kappaB complex. *Cell* 95, 749-58.
- Jäger, S., Groll, M., Huber, R., Wolf, D.H. and Heinemeyer, W., 1999. Proteasome beta-type subunits: unequal roles of propeptides in core particle maturation and a hierarchy of active site function. *J Mol Biol* 291, 997-1013.
- Jarvis, J.A., Ryan, M.T., Hoogenraad, N.J., Craik, D.J. and Høj, P.B., 1995. Solution structure of the acetylated and noncleavable mitochondrial targeting signal of rat chaperonin 10. *J Biol Chem* 270, 1323-31.
- Jayawardene, D.S. and Dass, C., 1999. The effect of N-terminal acetylation and the inhibition activity of acetylated enkephalins on the aminopeptidase M-catalyzed hydrolysis of enkephalins. *Peptides* 20, 963-70.
- Jeong, J.W., Bae, M.K., Ahn, M.Y., Kim, S.H., Sohn, T.K., Bae, M.H., Yoo, M.A., Song, E.J., Lee, K.J. and Kim, K.W., 2002. Regulation and destabilization of HIF-1alpha by ARD1-mediated acetylation. *Cell* 111, 709-20.
- John, H., Maronde, E., Forssmann, W.G., Meyer, M. and Adermann, K., 2008. N-terminal acetylation protects glucagon-like peptide GLP-1-(7-34)-amide from DPP-IV-mediated degradation retaining cAMP- and insulin-releasing capacity. *Eur J Med Res* 13, 73-8.
- Johnson, M., Coulton, A.T., Geeves, M.A. and Mulvihill, D.P., 2010. Targeted amino-terminal acetylation of recombinant proteins in *E. coli*. *PLoS One* 5, e15801.
- Jones, J.D. and O'Connor, C.D., 2011. Protein acetylation in prokaryotes. *Proteomics* 11, 3012-22.
- Kaidi, A., Williams, A.C. and Paraskeva, C., 2007. Interaction between beta-catenin and HIF-1 promotes cellular adaptation to hypoxia. *Nat Cell Biol* 9, 210-7.
- Kalvik, T.V. and Arnesen, T., 2013. Protein N-terminal acetyltransferases in cancer. *Oncogene* 32, 269-76.
- Kamita, M., Kimura, Y., Ino, Y., Kamp, R.M., Plevoda, B., Sherman, F. and Hirano, H., 2011. N(alpha)-Acetylation of yeast ribosomal proteins and its effect on protein synthesis. *J Proteomics* 74, 431-41.
- Kang, H.M., Kassam, G., Jarvis, S.E., Fitzpatrick, S.L. and Waisman, D.M., 1997. Characterization of human recombinant annexin II tetramer purified from bacteria: role of N-terminal acetylation. *Biochemistry* 36, 2041-50.

Date: 2015-01-28

- Kang, L., Janowska, M.K., Moriarty, G.M. and Baum, J., 2013. Mechanistic Insight into the Relationship between N-Terminal Acetylation of  $\alpha$ -Synuclein and Fibril Formation Rates by NMR and Fluorescence. *PLoS One* 8, e75018.
- Kang, L., Moriarty, G.M., Woods, L.A., Ashcroft, A.E., Radford, S.E. and Baum, J., 2012. N-terminal acetylation of  $\alpha$ -synuclein induces increased transient helical propensity and decreased aggregation rates in the intrinsically disordered monomer. *Protein Sci* 21, 911-7.
- Kao, C.Y., Los, F.C., Huffman, D.L., Wachi, S., Kloft, N., Husmann, M., Karabrahimi, V., Schwartz, J.L., Bellier, A., Ha, C., Sagong, Y., Fan, H., Ghosh, P., Hsieh, M., Hsu, C.S., Chen, L. and Aroian, R.V., 2011. Global functional analyses of cellular responses to pore-forming toxins. *PLoS Pathog* 7, e1001314.
- Karl, S., Pritschow, Y., Volcic, M., Häcker, S., Baumann, B., Wiesmüller, L., Debatin, K.M. and Fulda, S., 2009. Identification of a novel pro-apoptotic function of NF-kappaB in the DNA damage response. *J Cell Mol Med* 13, 4239-56.
- Ke, Q., Kluz, T. and Costa, M., 2005. Down-regulation of the expression of the FIH-1 and ARD-1 genes at the transcriptional level by nickel and cobalt in the human lung adenocarcinoma A549 cell line. *Int J Environ Res Public Health* 2, 10-3.
- Kendall, R.L. and Bradshaw, R.A., 1992. Isolation and characterization of the methionine aminopeptidase from porcine liver responsible for the co-translational processing of proteins. *J Biol Chem* 267, 20667-73.
- Kikuchi, J., Iwafune, Y., Akiyama, T., Okayama, A., Nakamura, H., Arakawa, N., Kimura, Y. and Hirano, H., 2010. Co- and post-translational modifications of the 26S proteasome in yeast. *Proteomics* 10, 2769-79.
- Kim, G.W., Li, L., Gorbani, M., You, L. and Yang, X.J., 2013. Mice Lacking  $\alpha$ -Tubulin Acetyltransferase 1 Are Viable but Display  $\alpha$ -Tubulin Acetylation Deficiency and Dentate Gyrus Distortion. *J Biol Chem* 288, 20334-50.
- Kim, S.H., Park, J.A., Kim, J.H., Lee, J.W., Seo, J.H., Jung, B.K., Chun, K.H., Jeong, J.W., Bae, M.K. and Kim, K.W., 2006. Characterization of ARD1 variants in mammalian cells. *Biochem Biophys Res Commun* 340, 422-7.
- Kimura, Y., Saeki, Y., Yokosawa, H., Polevoda, B., Sherman, F. and Hirano, H., 2003. N-Terminal modifications of the 19S regulatory particle subunits of the yeast proteasome. *Arch Biochem Biophys* 409, 341-8.
- Kimura, Y., Takaoka, M., Tanaka, S., Sassa, H., Tanaka, K., Polevoda, B., Sherman, F. and Hirano, H., 2000. N(alpha)-acetylation and proteolytic activity of the yeast 20 S proteasome. *J Biol Chem* 275, 4635-9.
- Kirkland, P.A., Humbard, M.A., Daniels, C.J. and Maupin-Furlow, J.A., 2008. Shotgun proteomics of the haloarchaeon *Haloferax volcanii*. *J Proteome Res* 7, 5033-9.
- Klein, E.A. and Assoian, R.K., 2008. Transcriptional regulation of the cyclin D1 gene at a glance. *J Cell Sci* 121, 3853-7.
- Kobayashi, Y., Mizusawa, K., Yamanome, T., Chiba, H. and Takahashi, A., 2009. Possible paracrine function of alpha-melanocyte-stimulating hormone and inhibition of its melanin-dispersing activity by N-terminal acetylation in the skin of the barfin flounder, *Verasper moseri*. *Gen Comp Endocrinol* 161, 419-24.
- Komiya, Y. and Habas, R., 2008. Wnt signal transduction pathways. *Organogenesis* 4, 68-75.
- Koplin, A., Preissler, S., Ilina, Y., Koch, M., Scior, A., Erhardt, M. and Deuerling, E., 2010. A dual function for chaperones SSB-RAC and the NAC nascent polypeptide-associated complex on ribosomes. *J Cell Biol* 189, 57-68.
- Kramer, G., Boehringer, D., Ban, N. and Bukau, B., 2009. The ribosome as a platform for co-translational processing, folding and targeting of newly synthesized proteins. *Nat Struct Mol Biol* 16, 589-97.

Date: 2015-01-28

- Kuo, H.P., Lee, D.F., Chen, C.T., Liu, M., Chou, C.K., Lee, H.J., Du, Y., Xie, X., Wei, Y., Xia, W., Weihua, Z., Yang, J.Y., Yen, C.J., Huang, T.H., Tan, M., Xing, G., Zhao, Y., Lin, C.H., Tsai, S.F., Fidler, I.J. and Hung, M.C., 2010. ARD1 stabilization of TSC2 suppresses tumorigenesis through the mTOR signaling pathway. *Sci Signal* 3, ra9.
- Kuo, H.P., Lee, D.F., Xia, W., Lai, C.C., Li, L.Y. and Hung, M.C., 2009. Phosphorylation of ARD1 by IKKbeta contributes to its destabilization and degradation. *Biochem Biophys Res Commun* 389, 156-61.
- Kuo, M.L., den Besten, W. and Sherr, C.J., 2004. N-Terminal polyubiquitination of the ARF tumor suppressor, a natural lysine-less protein. *Cell Cycle* 3, 1367-9.
- Lange, P.F., Huesgen, P.F., Nguyen, K. and Overall, C.M., 2014. Annotating N termini for the human proteome project: N termini and N $\alpha$ -acetylation status differentiate stable cleaved protein species from degradation remnants in the human erythrocyte proteome. *J Proteome Res* 13, 2028-44.
- Lange, P.F. and Overall, C.M., 2011. TopFIND, a knowledgebase linking protein termini with function. *Nat Methods* 8, 703-4.
- Lee, C.F., Ou, D.S., Lee, S.B., Chang, L.H., Lin, R.K., Li, Y.S., Upadhyay, A.K., Cheng, X., Wang, Y.C., Hsu, H.S., Hsiao, M., Wu, C.W. and Juan, L.J., 2010a. hNaa10p contributes to tumorigenesis by facilitating DNMT1-mediated tumor suppressor gene silencing. *J Clin Invest* 120, 2920-30.
- Lee, F.J., Lin, L.W. and Smith, J.A., 1989. N alpha acetylation is required for normal growth and mating of *Saccharomyces cerevisiae*. *J Bacteriol* 171, 5795-802.
- Lee, M.N., Lee, S.N., Kim, S.H., Kim, B., Jung, B.K., Seo, J.H., Park, J.H., Choi, J.H., Yim, S.H., Lee, M.R., Park, J.G., Yoo, J.Y., Kim, J.H., Lee, S.T., Kim, H.M., Ryeom, S., Kim, K.W. and Oh, G.T., 2010b. Roles of arrest-defective protein 1(225) and hypoxia-inducible factor 1alpha in tumor growth and metastasis. *J Natl Cancer Inst* 102, 426-42.
- Liebman, S.W. and Chernoff, Y.O., 2012. Prions in yeast. *Genetics* 191, 1041-72.
- Lim, J.H., Chun, Y.S. and Park, J.W., 2008. Hypoxia-inducible factor-1alpha obstructs a Wnt signaling pathway by inhibiting the hARD1-mediated activation of beta-catenin. *Cancer Res* 68, 5177-84.
- Lim, J.H., Park, J.W. and Chun, Y.S., 2006. Human arrest defective 1 acetylates and activates beta-catenin, promoting lung cancer cell proliferation. *Cancer Res* 66, 10677-82.
- Lin, S., Tsai, S.C., Lee, C.C., Wang, B.W., Liou, J.Y. and Shyu, K.G., 2004. Berberine inhibits HIF-1alpha expression via enhanced proteolysis. *Mol Pharmacol* 66, 612-9.
- Liszcak, G., Arnesen, T. and Marmorstein, R., 2011. Structure of a ternary Naa50p (NAT5/SAN) N-terminal acetyltransferase complex reveals the molecular basis for substrate-specific acetylation. *J Biol Chem* 286, 37002-10.
- Liszcak, G., Goldberg, J.M., Foy, H., Petersson, E.J., Arnesen, T. and Marmorstein, R., 2013. Molecular basis for N-terminal acetylation by the heterodimeric NatA complex. *Nat Struct Mol Biol*.
- Liszcak, G. and Marmorstein, R., 2013. Implications for the evolution of eukaryotic amino-terminal acetyltransferase (NAT) enzymes from the structure of an archaeal ortholog. *Proc Natl Acad Sci U S A*.
- Liu, C.C., Zhu, H.Y., Dong, X.M., Ning, D.L., Wang, H.X., Li, W.H., Yang, C.P. and Wang, B.C., 2013. Identification and analysis of the acetylated status of poplar proteins reveals analogous N-terminal protein processing mechanisms with other eukaryotes. *PLoS One* 8, e58681.
- Ma, C., Pathak, C., Jang, S., Lee, S.J., Nam, M., Kim, S.J., Im, H. and Lee, B.J., 2014. Structure of *Thermoplasma volcanium* Ard1 belongs to N-acetyltransferase family member suggesting multiple ligand binding modes with acetyl coenzyme A and coenzyme A. *Biochim Biophys Acta* 1844, 1790-7.

Date: 2015-01-28

- Mackay, D.T., Botting, C.H., Taylor, G.L. and White, M.F., 2007. An acetylase with relaxed specificity catalyses protein N-terminal acetylation in *Sulfolobus solfataricus*. *Mol Microbiol* 64, 1540-8.
- Maltsev, A.S., Ying, J. and Bax, A., 2012. Impact of N-terminal acetylation of  $\alpha$ -synuclein on its random coil and lipid binding properties. *Biochemistry* 51, 5004-13.
- Marmorstein, R. and Zhou, M.M., 2014. Writers and readers of histone acetylation: structure, mechanism, and inhibition. *Cold Spring Harb Perspect Biol* 6, a018762.
- Martin, D.T., Gendron, R.L., Jarzembowski, J.A., Perry, A., Collins, M.H., Pushpanathan, C., Miskiewicz, E., Castle, V.P. and Paradis, H., 2007. Tubedown expression correlates with the differentiation status and aggressiveness of neuroblastic tumors. *Clin Cancer Res* 13, 1480-7.
- Martinez, A., Traverso, J.A., Valot, B., Ferro, M., Espagne, C., Ephritikhine, G., Zivy, M., Giglione, C. and Meinel, T., 2008. Extent of N-terminal modifications in cytosolic proteins from eukaryotes. *Proteomics* 8, 2809-31.
- Mawuenyega, K.G., Kaji, H., Yamuchi, Y., Shinkawa, T., Saito, H., Taoka, M., Takahashi, N. and Isobe, T., 2003. Large-scale identification of *Caenorhabditis elegans* proteins by multidimensional liquid chromatography-tandem mass spectrometry. *J Proteome Res* 2, 23-35.
- McCool, K.W. and Miyamoto, S., 2012. DNA damage-dependent NF- $\kappa$ B activation: NEMO turns nuclear signaling inside out. *Immunol Rev* 246, 311-26.
- Michel, H., Hunt, D.F., Shabanowitz, J. and Bennett, J., 1988. Tandem mass spectrometry reveals that three photosystem II proteins of spinach chloroplasts contain N-acetyl-O-phosphothreonine at their NH<sub>2</sub> termini. *J Biol Chem* 263, 1123-30.
- Min, L., Xu, H., Wang, J., Qu, L., Jiang, B., Zeng, Y., Meng, L., Jin, H. and Shou, C., 2013. N- $\alpha$ -acetyltransferase 10 protein is a negative regulator of 28S proteasome through interaction with PA28 $\beta$ . *FEBS Lett*.
- Motwani, T., Poddar, M. and Holmes, S.G., 2012. Sir3 and epigenetic inheritance of silent chromatin in *Saccharomyces cerevisiae*. *Mol Cell Biol* 32, 2784-93.
- Mullen, J.R., Kaye, P.S., Moerschell, R.P., Tsunasawa, S., Gribskov, M., Colavito-Shepanski, M., Grunstein, M., Sherman, F. and Sternglanz, R., 1989. Identification and characterization of genes and mutants for an N-terminal acetyltransferase from yeast. *EMBO J* 8, 2067-75.
- Murphy, C.T. and Hu, P.J., 2013. Insulin/insulin-like growth factor signaling in *C. elegans*. *WormBook*, 1-43.
- Murray-Rust, T.A., Oldham, N.J., Hewitson, K.S. and Schofield, C.J., 2006. Purified recombinant hARD1 does not catalyse acetylation of Lys532 of HIF-1 $\alpha$  fragments in vitro. *FEBS Lett* 580, 1911-8.
- Murthi, A. and Hopper, A.K., 2005. Genome-wide screen for inner nuclear membrane protein targeting in *Saccharomyces cerevisiae*: roles for N-acetylation and an integral membrane protein. *Genetics* 170, 1553-60.
- Myklebust, L.M., Van Damme, P., Stove, S.I., Dorfel, M.J., Abboud, A., Kalvik, T.V., Grauffel, C., Jonckheere, V., Wu, Y., Swensen, J., Kaasa, H., Liszczak, G., Marmorstein, R., Reuter, N., Lyon, G.J., Gevaert, K. and Arnesen, T., 2014. Biochemical and cellular analysis of Ogden syndrome reveals downstream Nt-acetylation defects. *Hum Mol Genet*.
- Nazmi, A.R., Ozorowski, G., Pejic, M., Whitelegge, J.P., Gerke, V. and Luecke, H., 2012. N-terminal acetylation of annexin A2 is required for S100A10 binding. *Biol Chem* 393, 1141-50.
- Nesterchuk, M.V., Sergiev, P.V. and Dontsova, O.A., 2011. Posttranslational Modifications of Ribosomal Proteins in *Escherichia coli*. *Acta Naturae* 3, 22-33.



Date: 2015-01-28

- Niehrs, C., 2012. The complex world of WNT receptor signalling. *Nat Rev Mol Cell Biol* 13, 767-79.
- Ohkawa, N., Sugisaki, S., Tokunaga, E., Fujitani, K., Hayasaka, T., Setou, M. and Inokuchi, K., 2008. N-acetyltransferase ARD1-NAT1 regulates neuronal dendritic development. *Genes Cells* 13, 1171-83.
- Ohrfelt, A., Zetterberg, H., Andersson, K., Persson, R., Secic, D., Brinkmalm, G., Wallin, A., Mulugeta, E., Francis, P.T., Vanmechelen, E., Aarsland, D., Ballard, C., Blennow, K. and Westman-Brinkmalm, A., 2011. Identification of novel  $\alpha$ -synuclein isoforms in human brain tissue by using an online nanoLC-ESI-FTICR-MS method. *Neurochem Res* 36, 2029-42.
- Ohyama, K., Yasuda, K., Onga, K., Kakizuka, A. and Mori, N., 2012. Spatio-temporal expression pattern of the NatB complex, Nat5/Mdm20 in the developing mouse brain: implications for co-operative versus non-co-operative actions of Mdm20 and Nat5. *Gene Expr Patterns* 12, 36-45.
- Onishi, M., Liou, G.G., Buchberger, J.R., Walz, T. and Moazed, D., 2007. Role of the conserved Sir3-BAH domain in nucleosome binding and silent chromatin assembly. *Mol Cell* 28, 1015-28.
- Ouspenski, I.I., Elledge, S.J. and Brinkley, B.R., 1999. New yeast genes important for chromosome integrity and segregation identified by dosage effects on genome stability. *Nucleic Acids Res* 27, 3001-8.
- Pang, A.L., Clark, J., Chan, W.Y. and Rennert, O.M., 2011. Expression of human NAA11 (ARD1B) gene is tissue-specific and is regulated by DNA methylation. *Epigenetics* 6, 1391-9.
- Pang, A.L., Peacock, S., Johnson, W., Bear, D.H., Rennert, O.M. and Chan, W.Y., 2009. Cloning, characterization, and expression analysis of the novel acetyltransferase retrogene *Ard1b* in the mouse. *Biol Reprod* 81, 302-9.
- Paradis, H., Islam, T., Tucker, S., Tao, L., Koubi, S. and Gendron, R.L., 2008. Tubedown associates with cortactin and controls permeability of retinal endothelial cells to albumin. *J Cell Sci* 121, 1965-72.
- Park, E. and Rapoport, T.A., 2012. Mechanisms of Sec61/SecY-mediated protein translocation across membranes. *Annu Rev Biophys* 41, 21-40.
- Park, E.C. and Szostak, J.W., 1992. ARD1 and NAT1 proteins form a complex that has N-terminal acetyltransferase activity. *EMBO J* 11, 2087-93.
- Park, J., Kanayama, A., Yamamoto, K. and Miyamoto, Y., 2012. ARD1 binding to RIP1 mediates doxorubicin-induced NF- $\kappa$ B activation. *Biochem Biophys Res Commun* 422, 291-7.
- Park, J.H., Seo, J.H., Wee, H.J., Vo, T.T., Lee, E.J., Choi, H., Cha, J.H., Ahn, B.J., Shin, M.W., Bae, S.J. and Kim, K.W., 2014. Nuclear translocation of hARD1 contributes to proper cell cycle progression. *PLoS One* 9, e105185.
- Pech, M., Spreter, T., Beckmann, R. and Beatrix, B., 2010. Dual binding mode of the nascent polypeptide-associated complex reveals a novel universal adapter site on the ribosome. *J Biol Chem* 285, 19679-87.
- Pechmann, S., Willmund, F. and Frydman, J., 2013. The ribosome as a hub for protein quality control. *Mol Cell* 49, 411-21.
- Perdiz, D., Mackeh, R., Poüs, C. and Baillet, A., 2011. The ins and outs of tubulin acetylation: more than just a post-translational modification? *Cell Signal* 23, 763-71.
- Permyakov, S.E., Vologzhannikova, A.A., Emelyanenko, V.I., Knyazeva, E.L., Kazakov, A.S., Lapteva, Y.S., Permyakova, M.E., Zhadan, A.P. and Permyakov, E.A., 2012. The impact of alpha-N-acetylation on structural and functional status of parvalbumin. *Cell Calcium* 52, 366-76.



Date: 2015-01-28

- Pesaresi, P., Gardner, N.A., Masiero, S., Dietzmann, A., Eichacker, L., Wickner, R., Salamini, F. and Leister, D., 2003. Cytoplasmic N-terminal protein acetylation is required for efficient photosynthesis in Arabidopsis. *Plant Cell* 15, 1817-32.
- Pezza, J.A., Langseth, S.X., Raupp Yamamoto, R., Doris, S.M., Ulin, S.P., Salomon, A.R. and Serio, T.R., 2009. The NatA acetyltransferase couples Sup35 prion complexes to the [PSI<sup>+</sup>] phenotype. *Mol Biol Cell* 20, 1068-80.
- Pezza, J.A., Villali, J., Sindi, S.S. and Serio, T.R., 2014. Amyloid-associated activity contributes to the severity and toxicity of a prion phenotype. *Nat Commun* 5, 4384.
- Piton, A., Redin, C. and Mandel, J.L., 2013. XLID-Causing Mutations and Associated Genes Challenged in Light of Data From Large-Scale Human Exome Sequencing. *Am J Hum Genet*.
- Polevoda, B., Arnesen, T. and Sherman, F., 2009. A synopsis of eukaryotic Nalpha-terminal acetyltransferases: nomenclature, subunits and substrates. *BMC Proc* 3 Suppl 6, S2.
- Polevoda, B., Brown, S., Cardillo, T.S., Rigby, S. and Sherman, F., 2008. Yeast N(alpha)-terminal acetyltransferases are associated with ribosomes. *J Cell Biochem* 103, 492-508.
- Polevoda, B., Cardillo, T.S., Doyle, T.C., Bedi, G.S. and Sherman, F., 2003. Nat3p and Mdm20p are required for function of yeast NatB Nalpha-terminal acetyltransferase and of actin and tropomyosin. *J Biol Chem* 278, 30686-97.
- Polevoda, B., Norbeck, J., Takakura, H., Blomberg, A. and Sherman, F., 1999. Identification and specificities of N-terminal acetyltransferases from *Saccharomyces cerevisiae*. *EMBO J* 18, 6155-68.
- Polevoda, B. and Sherman, F., 2003a. Composition and function of the eukaryotic N-terminal acetyltransferase subunits. *Biochem Biophys Res Commun* 308, 1-11.
- Polevoda, B. and Sherman, F., 2003b. N-terminal acetyltransferases and sequence requirements for N-terminal acetylation of eukaryotic proteins. *J Mol Biol* 325, 595-622.
- Pool, M.R., Stumm, J., Fulga, T.A., Sinning, I. and Dobberstein, B., 2002. Distinct modes of signal recognition particle interaction with the ribosome. *Science* 297, 1345-8.
- Poot, R.A., Jeeninga, R.E., Pleij, C.W. and van Duin, J., 1997. Acetylation of ribosomal protein S5 affected by defects in the central pseudoknot in 16S ribosomal RNA? *FEBS Lett* 401, 175-9.
- Popp, B., Støve, S.I., Ende, S., Myklebust, L.M., Hoyer, J., Sticht, H., Azzarello-Burri, S., Rauch, A., Arnesen, T. and Reis, A., 2014. De novo missense mutations in the NAA10 gene cause severe non-syndromic developmental delay in males and females. *Eur J Hum Genet*.
- Pruitt, K.D., Tatusova, T. and Maglott, D.R., 2007. NCBI reference sequences (RefSeq): a curated non-redundant sequence database of genomes, transcripts and proteins. *Nucleic Acids Res* 35, D61-5.
- Ramagopal, S. and Subramanian, A.R., 1974. Alteration in the acetylation level of ribosomal protein L12 during growth cycle of *Escherichia coli*. *Proc Natl Acad Sci U S A* 71, 2136-40.
- Rauch, A., Wiczorek, D., Graf, E., Wieland, T., Ende, S., Schwarzmayer, T., Albrecht, B., Bartholdi, D., Beygo, J., Di Donato, N., Dufke, A., Cremer, K., Hempel, M., Horn, D., Hoyer, J., Joset, P., Röpke, A., Moog, U., Riess, A., Thiel, C.T., Tzschach, A., Wiesener, A., Wohlleber, E., Zweier, C., Ekici, A.B., Zink, A.M., Rump, A., Meisinger, C., Grallert, H., Sticht, H., Schenck, A., Engels, H., Rappold, G., Schröck, E., Wieacker, P., Riess, O., Meitinger, T., Reis, A. and Strom, T.M., 2012. Range of genetic mutations associated with severe non-syndromic sporadic intellectual disability: an exome sequencing study. *Lancet* 380, 1674-82.

Date: 2015-01-28

- Raue, U., Oellerer, S. and Rospert, S., 2007. Association of protein biogenesis factors at the yeast ribosomal tunnel exit is affected by the translational status and nascent polypeptide sequence. *J Biol Chem* 282, 7809-16.
- Recht, M.I. and Williamson, J.R., 2001. Central domain assembly: thermodynamics and kinetics of S6 and S18 binding to an S15-RNA complex. *J Mol Biol* 313, 35-48.
- Robson, A. and Collinson, I., 2006. The structure of the Sec complex and the problem of protein translocation. *EMBO Rep* 7, 1099-103.
- Rope, A.F., Wang, K., Evjenth, R., Xing, J., Johnston, J.J., Swensen, J.J., Johnson, W.E., Moore, B., Huff, C.D., Bird, L.M., Carey, J.C., Opitz, J.M., Stevens, C.A., Jiang, T., Schank, C., Fain, H.D., Robison, R., Dalley, B., Chin, S., South, S.T., Pysker, T.J., Jorde, L.B., Hakonarson, H., Lillehaug, J.R., Biesecker, L.G., Yandell, M., Arnesen, T. and Lyon, G.J., 2011. Using VAAST to identify an X-linked disorder resulting in lethality in male infants due to N-terminal acetyltransferase deficiency. *Am J Hum Genet* 89, 28-43.
- Roy-Chaudhuri, B., Kirthi, N., Kelley, T. and Culver, G.M., 2008. Suppression of a cold-sensitive mutation in ribosomal protein S5 reveals a role for RimJ in ribosome biogenesis. *Mol Microbiol* 68, 1547-59.
- Rual, J.F., Venkatesan, K., Hao, T., Hirozane-Kishikawa, T., Dricot, A., Li, N., Berriz, G.F., Gibbons, F.D., Dreze, M., Ayivi-Guedehoussou, N., Klitgord, N., Simon, C., Boxem, M., Milstein, S., Rosenberg, J., Goldberg, D.S., Zhang, L.V., Wong, S.L., Franklin, G., Li, S., Albala, J.S., Lim, J., Fraughton, C., Llamas, E., Cevik, S., Bex, C., Lamesch, P., Sikorski, R.S., Vandenhaute, J., Zoghbi, H.Y., Smolyar, A., Bosak, S., Sequerra, R., Doucette-Stamm, L., Cusick, M.E., Hill, D.E., Roth, F.P. and Vidal, M., 2005. Towards a proteome-scale map of the human protein-protein interaction network. *Nature* 437, 1173-8.
- Ruault, M., De Meyer, A., Loiodice, I. and Taddei, A., 2011. Clustering heterochromatin: Sir3 promotes telomere clustering independently of silencing in yeast. *J Cell Biol* 192, 417-31.
- Rusche, L.N., Kirchmaier, A.L. and Rine, J., 2003. The establishment, inheritance, and function of silenced chromatin in *Saccharomyces cerevisiae*. *Annu Rev Biochem* 72, 481-516.
- Sampath, V., Yuan, P., Wang, I.X., Prugar, E., van Leeuwen, F. and Sternglanz, R., 2009. Mutational analysis of the Sir3 BAH domain reveals multiple points of interaction with nucleosomes. *Mol Cell Biol* 29, 2532-45.
- Sánchez-Puig, N. and Fersht, A.R., 2006. Characterization of the native and fibrillar conformation of the human Nalpha-acetyltransferase ARD1. *Protein Sci* 15, 1968-76.
- Scheepens, A., Mould, R., Hofmann, O. and Brittain, T., 1995. Some effects of post-translational N-terminal acetylation of the human embryonic zeta globin protein. *Biochem J* 310 ( Pt 2), 597-600.
- Scott, D.C., Monda, J.K., Bennett, E.J., Harper, J.W. and Schulman, B.A., 2011. N-terminal acetylation acts as an avidity enhancer within an interconnected multiprotein complex. *Science* 334, 674-8.
- Sedwick, C., 2011. SRP and NAC: guiding a nascent protein's first steps. *PLoS Biol* 9, e1001103.
- Seo, J.H., Cha, J.H., Park, J.H., Jeong, C.H., Park, Z.Y., Lee, H.S., Oh, S.H., Kang, J.H., Suh, S.W., Kim, K.H., Ha, J.Y., Han, S.H., Kim, S.H., Lee, J.W., Park, J.A., Jeong, J.W., Lee, K.J., Oh, G.T., Lee, M.N., Kwon, S.W., Lee, S.K., Chun, K.H., Lee, S.J. and Kim, K.W., 2010. Arrest defective 1 autoacetylation is a critical step in its ability to stimulate cancer cell proliferation. *Cancer Res* 70, 4422-32.

Date: 2015-01-28

- Seo, J.H., Park, J.H., Lee, E.J., Vo, T.T., Choi, H., Jang, J.K., Wee, H.J., Ahn, B.J., Cha, J.H., Shin, M.W. and Kim, K.W., 2014. Autoacetylation regulates differentially the roles of ARD1 variants in tumorigenesis. *Int J Oncol*.
- Setty, S.R., Strohlic, T.I., Tong, A.H., Boone, C. and Burd, C.G., 2004. Golgi targeting of ARF-like GTPase Arl3p requires its Nalpha-acetylation and the integral membrane protein Sys1p. *Nat Cell Biol* 6, 414-9.
- Shemorry, A., Hwang, C.S. and Varshavsky, A., 2013. Control of protein quality and stoichiometries by N-terminal acetylation and the N-end rule pathway. *Mol Cell* 50, 540-51.
- Shida, T., Cueva, J.G., Xu, Z., Goodman, M.B. and Nachury, M.V., 2010. The major alpha-tubulin K40 acetyltransferase alphaTAT1 promotes rapid ciliogenesis and efficient mechanosensation. *Proc Natl Acad Sci U S A* 107, 21517-22.
- Shin, D.H., Chun, Y.S., Lee, K.H., Shin, H.W. and Park, J.W., 2009. Arrest defective-1 controls tumor cell behavior by acetylating myosin light chain kinase. *PLoS One* 4, e7451.
- Shin, S.H., Yoon, H., Chun, Y.S., Shin, H.W., Lee, M.N., Oh, G.T. and Park, J.W., 2014. Arrest defective 1 regulates the oxidative stress response in human cells and mice by acetylating methionine sulfoxide reductase A. *Cell Death Dis* 5, e1490.
- Shoemaker, K.R., Kim, P.S., York, E.J., Stewart, J.M. and Baldwin, R.L., 1987. Tests of the helix dipole model for stabilization of alpha-helices. *Nature* 326, 563-7.
- Singer, J.M. and Shaw, J.M., 2003. Mdm20 protein functions with Nat3 protein to acetylate Tpm1 protein and regulate tropomyosin-actin interactions in budding yeast. *Proc Natl Acad Sci U S A* 100, 7644-9.
- Soromani, C., Zeng, N., Hollemeyer, K., Heinzle, E., Klein, M.C., Tretter, T., Seaman, M.N. and Römisch, K., 2012. N-acetylation and phosphorylation of Sec complex subunits in the ER membrane. *BMC Cell Biol* 13, 34.
- Starheim, K.K., Gevaert, K. and Arnesen, T., 2012. Protein N-terminal acetyltransferases: when the start matters. *Trends Biochem Sci* 37, 152-61.
- Starheim, K.K., Gromyko, D., Evjenth, R., Rynningen, A., Varhaug, J.E., Lillehaug, J.R. and Arnesen, T., 2009a. Knockdown of human N alpha-terminal acetyltransferase complex C leads to p53-dependent apoptosis and aberrant human Arl8b localization. *Mol Cell Biol* 29, 3569-81.
- Starheim, K.K., Gromyko, D., Velde, R., Varhaug, J.E. and Arnesen, T., 2009b. Composition and biological significance of the human Nalpha-terminal acetyltransferases. *BMC Proc* 3 Suppl 6, S3.
- Starling, A.P., Sharma, R.P., East, J.M. and Lee, A.G., 1996. The effect of N-terminal acetylation on Ca(2+)-ATPase inhibition by phospholamban. *Biochem Biophys Res Commun* 226, 352-5.
- Steglich, B., Sazer, S. and Ekwall, K., 2013. Transcriptional regulation at the yeast nuclear envelope. *Nucleus* 4, 379-389.
- Stone, E.M., Reifsnyder, C., McVey, M., Gazo, B. and Pillus, L., 2000. Two classes of sir3 mutants enhance the sir1 mutant mating defect and abolish telomeric silencing in *Saccharomyces cerevisiae*. *Genetics* 155, 509-22.
- Stone, E.M., Swanson, M.J., Romeo, A.M., Hicks, J.B. and Sternglanz, R., 1991. The SIR1 gene of *Saccharomyces cerevisiae* and its role as an extragenic suppressor of several mating-defective mutants. *Mol Cell Biol* 11, 2253-62.
- Strous, G.J., Berns, A.J. and Bloemendal, H., 1974. N-terminal acetylation of the nascent chains of alpha-crystallin. *Biochem Biophys Res Commun* 58, 876-84.
- Strous, G.J., van Westreenen, H. and Bloemendal, H., 1973. Synthesis of lens protein in vitro. N-terminal acetylation of alpha-crystallin. *Eur J Biochem* 38, 79-85.

Date: 2015-01-28

- Sugiura, N., Adams, S.M. and Corriveau, R.A., 2003. An evolutionarily conserved N-terminal acetyltransferase complex associated with neuronal development. *J Biol Chem* 278, 40113-20.
- Sugiura, N., Patel, R.G. and Corriveau, R.A., 2001. N-methyl-D-aspartate receptors regulate a group of transiently expressed genes in the developing brain. *J Biol Chem* 276, 14257-63.
- Sweeny, E.A. and Shorter, J., 2008. Prion proteostasis: Hsp104 meets its supporting cast. *Prion* 2, 135-40.
- Takakura, H., Tsunasawa, S., Miyagi, M. and Warner, J.R., 1992. NH<sub>2</sub>-terminal acetylation of ribosomal proteins of *Saccharomyces cerevisiae*. *J Biol Chem* 267, 5442-5.
- Takao, T., Kobayashi, M., Nishimura, O. and Shimonishi, Y., 1987. Chemical characterization of recombinant human leukocyte interferon A using fast atom bombardment mass spectrometry. *J Biol Chem* 262, 3541-7.
- Talks, K.L., Turley, H., Gatter, K.C., Maxwell, P.H., Pugh, C.W., Ratcliffe, P.J. and Harris, A.L., 2000. The expression and distribution of the hypoxia-inducible factors HIF-1 $\alpha$  and HIF-2 $\alpha$  in normal human tissues, cancers, and tumor-associated macrophages. *Am J Pathol* 157, 411-21.
- Tanaka, S., Matsushita, Y., Yoshikawa, A. and Isono, K., 1989. Cloning and molecular characterization of the gene rimL which encodes an enzyme acetylating ribosomal protein L12 of *Escherichia coli* K12. *Mol Gen Genet* 217, 289-93.
- Tanimoto, K., Makino, Y., Pereira, T. and Poellinger, L., 2000. Mechanism of regulation of the hypoxia-inducible factor-1  $\alpha$  by the von Hippel-Lindau tumor suppressor protein. *EMBO J* 19, 4298-309.
- Terhorst, C., Möller, W., Laursen, R. and Wittmann-Liebold, B., 1973. The primary structure of an acidic protein from 50-S ribosomes of *Escherichia coli* which is involved in GTP hydrolysis dependent on elongation factors G and T. *Eur J Biochem* 34, 138-52.
- Tipton, K.A., Verges, K.J. and Weissman, J.S., 2008. In vivo monitoring of the prion replication cycle reveals a critical role for Sis1 in delivering substrates to Hsp104. *Mol Cell* 32, 584-91.
- Tokunaga, F., Aruga, R., Iwanaga, S., Tanaka, K., Ichihara, A., Takao, T. and Shimonishi, Y., 1990. The NH<sub>2</sub>-terminal residues of rat liver proteasome (multicatalytic proteinase complex) subunits, C2, C3 and C8, are N  $\alpha$ -acetylated. *FEBS Lett* 263, 373-5.
- Trexler, A.J. and Rhoades, E., 2012. N-Terminal acetylation is critical for forming  $\alpha$ -helical oligomer of  $\alpha$ -synuclein. *Protein Sci* 21, 601-5.
- Tribioli, C., Mancini, M., Plassart, E., Bione, S., Rivella, S., Sala, C., Torri, G. and Toniolo, D., 1994. Isolation of new genes in distal Xq28: transcriptional map and identification of a human homologue of the ARD1 N-acetyl transferase of *Saccharomyces cerevisiae*. *Hum Mol Genet* 3, 1061-7.
- Utsumi, T., Sato, M., Nakano, K., Takemura, D., Iwata, H. and Ishisaka, R., 2001. Amino acid residue penultimate to the amino-terminal gly residue strongly affects two cotranslational protein modifications, N-myristoylation and N-acetylation. *J Biol Chem* 276, 10505-13.
- Van Damme, P., Arnesen, T. and Gevaert, K., 2011a. Protein  $\alpha$ -N-acetylation studied by N-terminomics. *FEBS J* 278, 3822-34.
- Van Damme, P., Evjenth, R., Foyn, H., Demeyer, K., De Bock, P.J., Lillehaug, J.R., Vandekerckhove, J., Arnesen, T. and Gevaert, K., 2011b. Proteome-derived peptide libraries allow detailed analysis of the substrate specificities of N( $\alpha$ )-acetyltransferases and point to hNaa10p as the post-translational actin N( $\alpha$ )-acetyltransferase. *Mol Cell Proteomics* 10, M110.004580.
- Van Damme, P., Hole, K., Pimenta-Marques, A., Helsens, K., Vandekerckhove, J., Martinho, R.G., Gevaert, K. and Arnesen, T., 2011c. NatF contributes to an evolutionary shift in



Date: 2015-01-28

- protein N-terminal acetylation and is important for normal chromosome segregation. *PLoS Genet* 7, e1002169.
- Van Damme, P., Lasa, M., Polevoda, B., Gazquez, C., Elosegui-Artola, A., Kim, D.S., De Juan-Pardo, E., Demeyer, K., Hole, K., Larrea, E., Timmerman, E., Prieto, J., Arnesen, T., Sherman, F., Gevaert, K. and Aldabe, R., 2012. N-terminal acetylome analyses and functional insights of the N-terminal acetyltransferase NatB. *Proc Natl Acad Sci U S A* 109, 12449-54.
- Van Damme, P., Støve, S.I., Glomnes, N., Gevaert, K. and Arnesen, T., 2014. A *Saccharomyces cerevisiae* model reveals in vivo functional impairment of the Ogden syndrome N-terminal acetyltransferase Naa10S37P mutant. *Mol Cell Proteomics*.
- van Deventer, S., Menendez-Benito, V., van Leeuwen, F. and Neefjes, J., 2014. N-terminal acetylation and replicative age affect proteasome localization and cell fitness during aging. *J Cell Sci*.
- Van Doren, S.R., Wei, S., Gao, G., DaGue, B.B., Palmier, M.O., Bahudhanapati, H. and Brew, K., 2008. Inactivation of N-TIMP-1 by N-terminal acetylation when expressed in bacteria. *Biopolymers* 89, 960-8.
- van Welsem, T., Frederiks, F., Verzijlbergen, K.F., Faber, A.W., Nelson, Z.W., Egan, D.A., Gottschling, D.E. and van Leeuwen, F., 2008. Synthetic lethal screens identify gene silencing processes in yeast and implicate the acetylated amino terminus of Sir3 in recognition of the nucleosome core. *Mol Cell Biol* 28, 3861-72.
- Varshavsky, A., 2011. The N-end rule pathway and regulation by proteolysis. *Protein Sci*.
- Vetting, M.W., Bareich, D.C., Yu, M. and Blanchard, J.S., 2008. Crystal structure of RimI from *Salmonella typhimurium* LT2, the GNAT responsible for N(alpha)-acetylation of ribosomal protein S18. *Protein Sci* 17, 1781-90.
- Vetting, M.W., S de Carvalho, L.P., Yu, M., Hegde, S.S., Magnet, S., Roderick, S.L. and Blanchard, J.S., 2005. Structure and functions of the GNAT superfamily of acetyltransferases. *Arch Biochem Biophys* 433, 212-26.
- Voorhees, R.M., Fernandez, I.S., Scheres, S.H. and Hegde, R.S., 2014. Structure of the mammalian ribosome-Sec61 complex to 3.4 Å resolution. *Cell* 157, 1632-43.
- Wan, K., Tsuchihashi, K., Kanda, K., Shimoji, K. and Mizuta, K., 2013. Nα-acetyltransferase NatA is involved in ribosome synthesis in *Saccharomyces cerevisiae*. *Biosci Biotechnol Biochem* 77, 631-8.
- Wang, F., Li, G., Altaf, M., Lu, C., Currie, M.A., Johnson, A. and Moazed, D., 2013. Heterochromatin protein Sir3 induces contacts between the amino terminus of histone H4 and nucleosomal DNA. *Proc Natl Acad Sci U S A* 110, 8495-500.
- Wang, X., Chen, C.F., Baker, P.R., Chen, P.L., Kaiser, P. and Huang, L., 2007. Mass spectrometric characterization of the affinity-purified human 26S proteasome complex. *Biochemistry* 46, 3553-65.
- Wang, X., Connelly, J.J., Wang, C.L. and Sternglanz, R., 2004. Importance of the Sir3 N terminus and its acetylation for yeast transcriptional silencing. *Genetics* 168, 547-51.
- Wang, Y., Mijares, M., Gall, M.D., Turan, T., Javier, A., Bornemann, D.J., Manage, K. and Warrior, R., 2010. *Drosophila* variable nurse cells encodes arrest defective 1 (ARD1), the catalytic subunit of the major N-terminal acetyltransferase complex. *Dev Dyn* 239, 2813-27.
- Wang, Z., Guo, J., Li, Y., Bavarva, J.H., Qian, C., Brahimi-Horn, M.C., Tan, D. and Liu, W., 2012. Inactivation of androgen-induced regulator ARD1 inhibits androgen receptor acetylation and prostate tumorigenesis. *Proc Natl Acad Sci U S A* 109, 3053-8.
- Warnhoff, K., Murphy, J.T., Kumar, S., Schneider, D.L., Peterson, M., Hsu, S., Guthrie, J., Robertson, J.D. and Kornfeld, K., 2014. The DAF-16 FOXO Transcription Factor Regulates natc-1 to Modulate Stress Resistance in *Caenorhabditis elegans*, Linking



Date: 2015-01-28

- Insulin/IGF-1 Signaling to Protein N-Terminal Acetylation. *PLoS Genet* 10, e1004703.
- Wegrzyn, R.D., Hofmann, D., Merz, F., Nikolay, R., Rauch, T., Graf, C. and Deuerling, E., 2006. A conserved motif is prerequisite for the interaction of NAC with ribosomal protein L23 and nascent chains. *J Biol Chem* 281, 2847-57.
- White-Ziegler, C.A., Black, A.M., Eliades, S.H., Young, S. and Porter, K., 2002. The N-acetyltransferase RimJ responds to environmental stimuli to repress pap fimbrial transcription in *Escherichia coli*. *J Bacteriol* 184, 4334-42.
- Whiteway, M., Freedman, R., Van Arsdell, S., Szostak, J.W. and Thorner, J., 1987. The yeast *ARD1* gene product is required for repression of cryptic mating-type information at the *HML* locus. *Mol Cell Biol* 7, 3713-22.
- Whiteway, M. and Szostak, J.W., 1985. The *ARD1* gene of yeast functions in the switch between the mitotic cell cycle and alternative developmental pathways. *Cell* 43, 483-92.
- Williams, B.C., Garrett-Engle, C.M., Li, Z., Williams, E.V., Rosenman, E.D. and Goldberg, M.L., 2003. Two putative acetyltransferases, *san* and *deco*, are required for establishing sister chromatid cohesion in *Drosophila*. *Curr Biol* 13, 2025-36.
- Willis, D.M., Loewy, A.P., Charlton-Kachigian, N., Shao, J.S., Ornitz, D.M. and Towler, D.A., 2002. Regulation of osteocalcin gene expression by a novel Ku antigen transcription factor complex. *J Biol Chem* 277, 37280-91.
- Wilson, T.E., 2002. A genomics-based screen for yeast mutants with an altered recombination/end-joining repair ratio. *Genetics* 162, 677-88.
- Wu, J., Chang, S., Gong, X., Liu, D. and Ma, Q., 2006. Identification of N-terminal acetylation of recombinant human prothymosin alpha in *Escherichia coli*. *Biochim Biophys Acta* 1760, 1241-7.
- Xiao, K., McClatchy, D.B., Shukla, A.K., Zhao, Y., Chen, M., Shenoy, S.K., Yates, J.R. and Lefkowitz, R.J., 2007. Functional specialization of beta-arrestin interactions revealed by proteomic analysis. *Proc Natl Acad Sci U S A* 104, 12011-6.
- Xiao, Q., Zhang, F., Nacev, B.A., Liu, J.O. and Pei, D., 2010. Protein N-terminal processing: substrate specificity of *Escherichia coli* and human methionine aminopeptidases. *Biochemistry* 49, 5588-99.
- Xu, H., Jiang, B., Meng, L., Ren, T., Zeng, Y., Wu, J., Qu, L. and Shou, C., 2012. N- $\alpha$ -acetyltransferase 10 protein inhibits apoptosis through RelA/p65-regulated MCL1 expression. *Carcinogenesis* 33, 1193-202.
- Yamada, R. and Bradshaw, R.A., 1991. Rat liver polysome N alpha-acetyltransferase: isolation and characterization. *Biochemistry* 30, 1010-6.
- Yi, C.H., Pan, H., Seebacher, J., Jang, I.H., Hyberts, S.G., Heffron, G.J., Vander Heiden, M.G., Yang, R., Li, F., Locasale, J.W., Sharfi, H., Zhai, B., Rodriguez-Mias, R., Luithardt, H., Cantley, L.C., Daley, G.Q., Asara, J.M., Gygi, S.P., Wagner, G., Liu, C.F. and Yuan, J., 2011. Metabolic regulation of protein N-alpha-acetylation by Bcl-xL promotes cell survival. *Cell* 146, 607-20.
- Yi, C.H., Sogah, D.K., Boyce, M., Degterev, A., Christofferson, D.E. and Yuan, J., 2007. A genome-wide RNAi screen reveals multiple regulators of caspase activation. *J Cell Biol* 179, 619-26.
- Yoo, Y.G., Kong, G. and Lee, M.O., 2006. Metastasis-associated protein 1 enhances stability of hypoxia-inducible factor-1alpha protein by recruiting histone deacetylase 1. *EMBO J* 25, 1231-41.
- Yoon, H., Kim, H.L., Chun, Y.S., Shin, D.H., Lee, K.H., Shin, C.S., Lee, D.Y., Kim, H.H., Lee, Z.H., Ryoo, H.M., Lee, M.N., Taeg Oh, G. and Park, J.W., 2014. NAA10 controls osteoblast differentiation and bone formation as a feedback regulator of Runx2. *Nat Commun* 5, 5176.

Date: 2015-01-28

- Yoshikawa, A., Isono, S., Sheback, A. and Isono, K., 1987. Cloning and nucleotide sequencing of the genes rimI and rimJ which encode enzymes acetylating ribosomal proteins S18 and S5 of Escherichia coli K12. *Mol Gen Genet* 209, 481-8.
- Zabrocki, P., Bastiaens, I., Delay, C., Bammens, T., Ghillebert, R., Pellens, K., De Virgilio, C., Van Leuven, F. and Winderickx, J., 2008. Phosphorylation, lipid raft interaction and traffic of alpha-synuclein in a yeast model for Parkinson. *Biochim Biophys Acta* 1783, 1767-80.
- Zattas, D., Adle, D.J., Rubenstein, E.M. and Hochstrasser, M., 2013. N-terminal acetylation of the yeast Derlin Der1 is essential for Hrd1 ubiquitin-ligase activity toward luminal ER substrates. *Mol Biol Cell* 24, 890-900.
- Zeng, Y., Min, L., Han, Y., Meng, L., Liu, C., Xie, Y., Dong, B., Wang, L., Jiang, B., Xu, H., Zhuang, Q., Zhao, C., Qu, L. and Shou, C., 2014. Inhibition of STAT5a by Naa10p contributes to decreased breast cancer metastasis. *Carcinogenesis* 35, 2244-53.
- Zhang, Y., Berndt, U., Götz, H., Tais, A., Oellerer, S., Wölfle, T., Fitzke, E. and Rospert, S., 2012. NAC functions as a modulator of SRP during the early steps of protein targeting to the endoplasmic reticulum. *Mol Biol Cell* 23, 3027-40.
- Zhong, H., De Marzo, A.M., Laughner, E., Lim, M., Hilton, D.A., Zagzag, D., Buechler, P., Isaacs, W.B., Semenza, G.L. and Simons, J.W., 1999. Overexpression of hypoxia-inducible factor 1alpha in common human cancers and their metastases. *Cancer Res* 59, 5830-5.
- Zhu, H.Y., Li, C.M., Wang, L.F., Bai, H., Li, Y.P., Yu, W.X., Xia, D.A. and Liu, C.C., 2014. In Silico Identification and Characterization of N-Terminal Acetyltransferase Genes of Poplar (*Populus trichocarpa*). *Int J Mol Sci* 15, 1852-64.
- Zybailov, B., Rutschow, H., Friso, G., Rudella, A., Emanuelsson, O., Sun, Q. and van Wijk, K.J., 2008. Sorting signals, N-terminal modifications and abundance of the chloroplast proteome. *PLoS One* 3, e1994.
